# Supplementary material for: Copper-catalyzed enantioselective sulfonylation from sulfur dioxide: generation of tertiary propargylic sulfones
Source: Royal Society of Chemistry journal article supplement (doi:10.1039/d4qo02389g), 2025-01-01
Supplement: d4qo02389g1.pdf [file d4qo02389g1.pdf]

# Copper-Catalyzed Enantioselective Sulfonylation from Sulfur Dioxide: Generation of Tertiary Propargylic Sulfones

Chen Guo,<sup>[a]</sup> Jiapian Huang,<sup>[b]</sup> Shengqing Ye,<sup>\*[a]</sup> Min Yang<sup>\*[b]</sup> and Jie Wu<sup>\*[a,c]</sup>

<sup>[a]</sup>*School of Pharmaceutical and Chemical Engineering & Institute for Advanced Studies, Taizhou University,  
Taizhou 318000 (China)*

<sup>[b]</sup>*School of Pharmacy, Jiangxi Provincial Key Laboratory of Tissue Engineering, Gannan Medical University,  
Ganzhou 341000 (China)*

<sup>[c]</sup>*State Key Laboratory of Organometallic Chemistry, Shanghai Institute of Organic Chemistry, Chinese Academy  
of Sciences, Shanghai 200032 (China)*

## Supporting Information

### Table of Content

|                                                                                                                                                |     |
|------------------------------------------------------------------------------------------------------------------------------------------------|-----|
| 1 Supplementary Notes .....                                                                                                                    | S2  |
| 2. The substrates involved in the reactions and their synthesis .....                                                                          | S3  |
| 2.1 General procedure for the preparation of cyclic carbonates .....                                                                           | S3  |
| 2.2 General procedure for the preparation of cyclopropanol 2. <sup>2</sup> .....                                                               | S4  |
| 3. General procedure for the reaction of propargylic cyclic carbonates 1, cyclopropanols<br>2, and DABCO·(SO <sub>2</sub> ) <sub>2</sub> ..... | S5  |
| 4. Optimization of the ligands.....                                                                                                            | S6  |
| 5. Characterization of all products and HPLC chromatograph.....                                                                                | S7  |
| 6. Crystal data and structural refinement for 3ai.....                                                                                         | S44 |
| 7. NMR spectra of compounds .....                                                                                                              | S49 |
| 8. References.....                                                                                                                             | S86 |

## 1 Supplementary Notes

All glassware was thoroughly oven-dried. Chemicals and solvents were either purchased from commercial suppliers or purified by standard techniques. Thin-layer chromatography plates were visualized by exposure to ultraviolet light and/or  $I_2$ . Flash chromatography was carried out using silica gel (200–300 mesh).  $^1\text{H}$  NMR and  $^{13}\text{C}$  NMR spectra were recorded on a Bruker AM-400 (400 MHz). The spectra were recorded in deuteriochloroform ( $\text{CDCl}_3$ ) as solvent at room temperature,  $^1\text{H}$  and  $^{13}\text{C}$  NMR chemical shifts are reported in ppm relative to the residual solvent peak. The residual solvent signals were used as references and the chemical shifts were converted to the TMS scale ( $\text{CDCl}_3$ :  $\delta_{\text{H}} = 7.26$  ppm,  $\delta_{\text{C}} = 77.0$  ppm). Data for  $^1\text{H}$  NMR are reported as follows: chemical shift ( $\delta$  ppm), multiplicity (s = singlet, d = doublet, t = triplet, m = multiplet, dd = doublet, br = broad), integration, coupling constant (Hz) and assignment. Data for  $^{13}\text{C}$  NMR are reported as chemical shift. Electrospray-ionisation HRMS data were acquired on a Q-TOF mass spectrometer (Waters SYNAPT G2-Si) LC-MS TOF. The enantiomeric excess values were determined by chiral HPLC with a Shimadzu instrument and a Daicel CHIRALCEL and CHIRALPAK column.

## 2. The substrates involved in the reactions and their synthesis

### 2.1 General procedure for the preparation of cyclic carbonates

The propargylic cyclic carbonates **1** are known compounds, which were prepared according to literatures.<sup>1</sup>

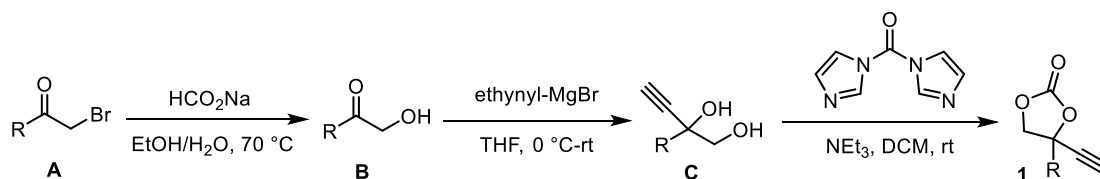

To a mixture of HCOONa (204 mmol), EtOH (80 mL), and H<sub>2</sub>O (40 mL) was added compound **A** (30 mmol). The mixture was then stirred for 12 h at 70 °C in oil bath. After concentrated under vacuum, the residue was added EtOAc (100 mL) and H<sub>2</sub>O (50 mL). The aqueous layer was extracted with EtOAc (50 mL × 3). The combined organic layers were dried over anhydrous Na<sub>2</sub>SO<sub>4</sub> and then concentrated under vacuum to give the crude **B**.

To the solution of **B** in THF (50 mL) was dropwisely added ethynylmagnesium bromide (0.5 M in THF, 180 mL) at 0 °C with ice-water bath. The mixture was then stirred for 12 h at room temperature. After quenched with NH<sub>4</sub>Cl (sat.), the aqueous layer was extracted with EtOAc (50 mL × 3). The combined organic layers were dried over anhydrous Na<sub>2</sub>SO<sub>4</sub> and concentrated under vacuum to give the crude **C**.

To the solution of **C** in DCM (40 mL) was added sequentially Et<sub>3</sub>N (30 mmol) and 1,1'-carbonyldiimidazole (30 mmol). The resulted mixture was stirred for 12 h at room temperature. After concentrated under vacuum, the residue was purified by flash column chromatography on silica gel (petroleum ether/ethyl acetate = 10/1) to give the substrate **1**.

## 2.2 General procedure for the preparation of cyclopropanol **2**.<sup>2</sup>

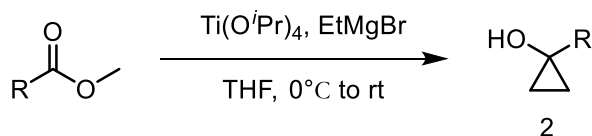

Ethyl magnesium bromide (1.0 M in THF, 17.5 mmol, 3.5 equiv) in THF was added dropwisely over 30 min at -10 °C to a solution of ester (5.0 mmol, 1.0 equiv) and titanium isopropoxide (7.0 mmol, 1.4 equiv) in THF (20 mL, 0.25 M). The mixture was warmed to room temperature and stirred overnight. Then the mixture was quenched with water, and the precipitated solid was removed by filtration. The filtrate was extracted with ethyl acetate, washed with water, and dried over Na<sub>2</sub>SO<sub>4</sub>. Followed by filtration and concentration, the residue was purified by column chromatography to afford cyclopropanol **2**.

### 3. General procedure for the reaction of propargylic cyclic carbonates

#### 1, cyclopropanols 2, and DABCO·(SO<sub>2</sub>)<sub>2</sub>

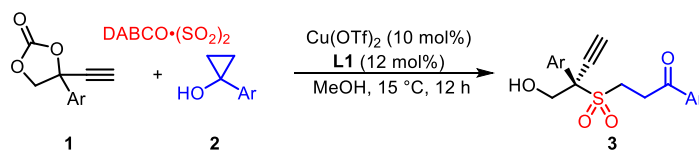

In a screw-capped vial, Cu(OTf)<sub>2</sub> (3.6 mg, 10 mol %) and L1 (4 mg, 12 mol %) were combined with MeOH (2 mL). The resultant solution was stirred for 30 min at room temperature. Propargylic cyclic carbonate **1** (0.1 mmol, 1.0 equiv), cyclopropanol **2** (0.15 mmol, 1.5 equiv), and DABCO·(SO<sub>2</sub>)<sub>2</sub> (36.0 mg, 0.15 mmol, 1.5 equiv) were added under N<sub>2</sub> atmosphere. The mixture was stirred at 15 °C for 12 h. Then the mixture was purified directly by flash column chromatography (*n*-Hexane/EtOAc (v/v): 3/1 - 8/1) to provide the desired product **3**.

## 4. Optimization of the ligands

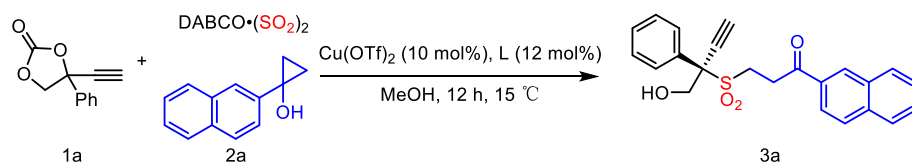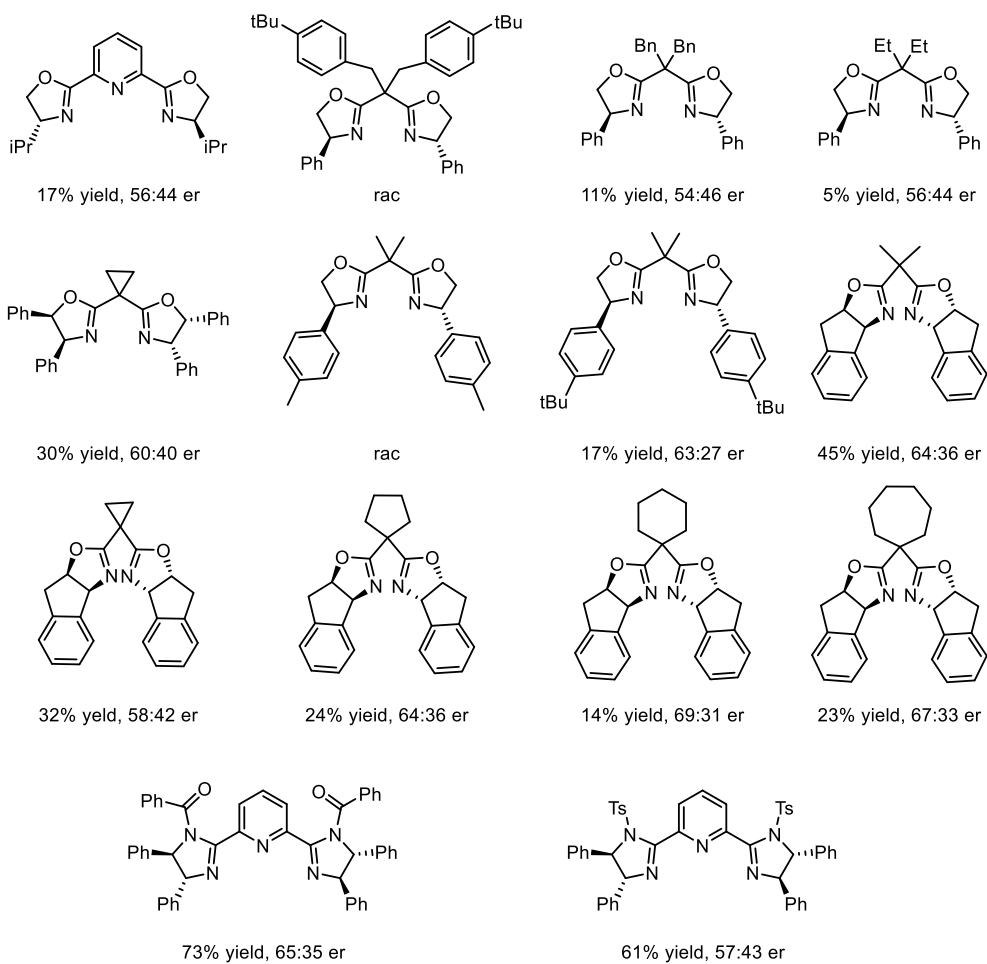

## 5. Characterization of all products and HPLC chromatograph

### (R)-3-((1-hydroxy-2-phenylbut-3-yn-2-yl)sulfonyl)-1-(naphthalen-2-yl)propan-1-one (3a)

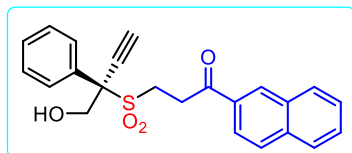

Purification by flash chromatography (*n*-hexane/ethyl acetate = 4/1). yellow solid, 82% yield, 95:5 er.  $[\alpha]_D^{25} = -11.5$  ( $c = 0.1$ ,  $\text{CHCl}_3$ );  $^1\text{H NMR}$  (400 MHz,  $\text{CDCl}_3$ )  $\delta$  (ppm) 8.42 (s, 1H), 7.96 (d,  $J = 8.4$  Hz, 2H), 7.91 – 7.81 (m, 4H), 7.59 (dt,  $J = 14.3, 6.9$  Hz, 2H), 7.50 – 7.42 (m, 3H), 4.80 (dd,  $J = 11.9, 6.8$  Hz, 1H), 4.22 (dd,  $J = 11.9, 7.3$  Hz, 1H), 3.91 – 3.81 (m, 1H), 3.70 – 3.43 (m, 3H), 3.09 (s, 1H), 2.76 (t,  $J = 7.2$  Hz, 1H);  $^{13}\text{C NMR}$  (100 MHz,  $\text{CDCl}_3$ )  $\delta$  (ppm) 195.6, 135.9, 133.1, 132.4, 130.4, 130.1, 129.7, 128.9, 127.8, 127.1, 123.5, 81.5, 71.9, 65.6, 45.3, 30.4; HRMS (ESI) for  $\text{C}_{23}\text{H}_{20}\text{O}_4\text{S}$   $[\text{M}+\text{Na}]^+$  calcd. 415.1293, found: 415.0984.

**HPLC analysis:** CHIRALPAK ID (Hexane/*i*-PrOH) = 60:40, flow rate = 1.0 mL/min, wave length = 247 nm,  $t_R = 30.565$  min (major),  $t_R = 39.384$  min (minor).

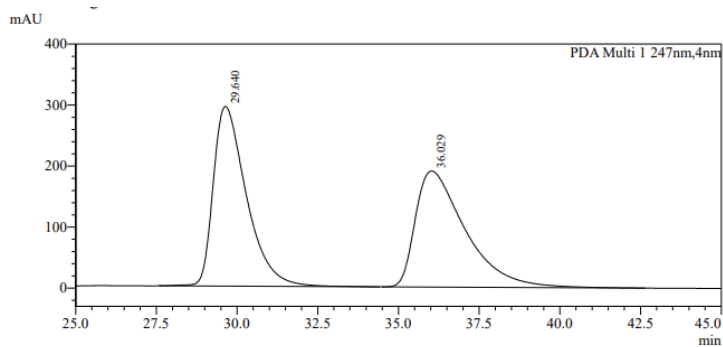

<Peak Table>

| PDA Ch1 247nm |           |          |        |        |
|---------------|-----------|----------|--------|--------|
| Peak#         | Ret. Time | Area     | Height | Aera%  |
| 1             | 29.640    | 21113213 | 294614 | 50.691 |
| 2             | 36.029    | 20537291 | 190298 | 49.309 |

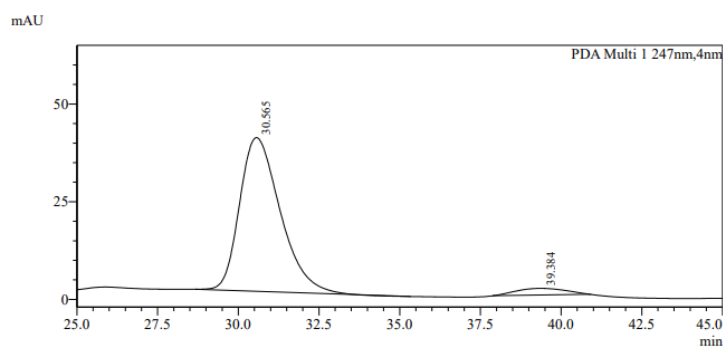

<Peak Table>

| PDA Ch1 247nm |           |         |        |        |
|---------------|-----------|---------|--------|--------|
| Peak#         | Ret. Time | Area    | Height | Aera%  |
| 1             | 30.565    | 3453461 | 39329  | 94.938 |
| 2             | 39.384    | 184149  | 1713   | 5.062  |

**(R)-3-((1-hydroxy-2-(p-tolyl)but-3-yn-2-yl)sulfonyl)-1-(naphthalen-2-yl)propan-1-one (3b)**

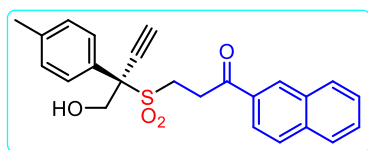

Purification by flash chromatography (*n*-hexane/ethyl acetate = 4/1). yellow solid, 77% yield, 93.5:6.5 er.  $[\alpha]_D^{25} = 88.2$  ( $c = 0.24$ ,  $\text{CHCl}_3$ );  $^1\text{H NMR}$  (400 MHz,  $\text{CDCl}_3$ )  $\delta$  (ppm) 8.41 (s, 1H), 7.95 (d,  $J = 8.4$  Hz, 2H), 7.87 (dd,  $J = 8.3, 4.0$  Hz, 2H), 7.71 (d,  $J = 8.2$  Hz, 2H), 7.59 (dt,  $J = 14.4, 7.0$  Hz, 2H), 7.25 (s, 2H), 4.77 (dd,  $J = 11.7, 6.0$  Hz, 1H), 4.20 (dd,  $J = 11.7, 6.4$  Hz, 1H), 3.85 – 3.77 (m, 1H), 3.65 – 3.44 (m, 3H), 3.07 (s, 1H), 2.79 (t,  $J = 6.5$  Hz, 1H), 2.35 (s, 3H);  $^{13}\text{C NMR}$  (100 MHz,  $\text{CDCl}_3$ )  $\delta$  (ppm) 195.7, 140.2, 135.9, 133.1, 132.4, 130.1, 129.7, 128.9, 128.7, 127.8, 127.3, 127.0, 123.5, 81.3, 77.5, 71.7, 65.6, 45.2, 30.4, 21.2; HRMS (ESI) for  $\text{C}_{24}\text{H}_{22}\text{O}_4\text{S}$   $[\text{M}+\text{Na}]^+$  calcd. 429.1239, found: 429.1136. HPLC analysis: CHIRALPAK ID (Hexane/*i*-PrOH) = 60:40, flow rate = 1.0 mL/min, wave length = 227 nm,  $t_R = 21.712$  min (major),  $t_R = 26.270$  min (minor).

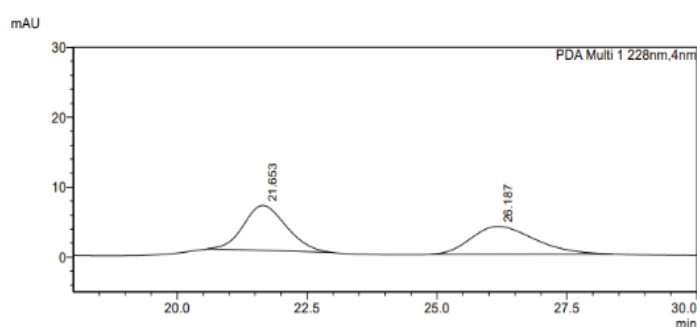

<Peak Table>

| PDA Ch1 228nm |           |        |        |        |
|---------------|-----------|--------|--------|--------|
| Peak#         | Ret. Time | Area   | Height | Aera%  |
| 1             | 21.653    | 370755 | 6432   | 52.160 |
| 2             | 26.187    | 340051 | 3979   | 47.840 |

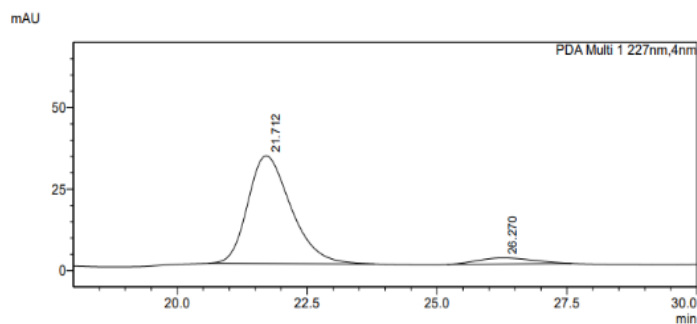

<Peak Table>

| PDA Ch1 227nm |           |         |        |        |
|---------------|-----------|---------|--------|--------|
| Peak#         | Ret. Time | Area    | Height | Aera%  |
| 1             | 21.712    | 1912918 | 33022  | 93.278 |
| 2             | 26.270    | 137847  | 1859   | 6.722  |



**(R)-3-((1-hydroxy-2-(4-methoxyphenyl)but-3-yn-2-yl)sulfonyl)-1-(naphthalen-2-yl)propan-1-one (3c)**

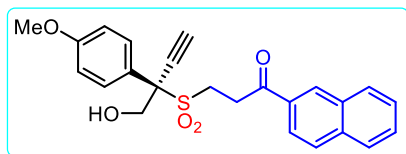

Purification by flash chromatography (*n*-hexane/ethyl acetate = 4/1). yellow solid, 66% yield, 90:10 er.  $[\alpha]_D^{25} = -12.7$  ( $c = 0.2$ ,  $\text{CHCl}_3$ );  $^1\text{H NMR}$  (400 MHz,  $\text{CDCl}_3$ )  $\delta$  (ppm) 8.41 (s, 1H), 7.96 (dd,  $J = 8.6, 1.7$  Hz, 2H), 7.89 – 7.86 (m, 2H), 7.79 – 7.71 (m, 2H), 7.64 – 7.55 (m, 2H), 7.00 – 6.92 (m,

2H), 4.75 (dd,  $J = 11.8, 6.9$  Hz, 1H), 4.19 (dd,  $J = 11.9, 7.2$  Hz, 1H), 3.86 – 3.77 (m, 4H), 3.69 – 3.53 (m, 2H), 3.52 – 3.42 (m, 1H), 3.07 (s, 1H), 2.76 (t,  $J = 7.2$  Hz, 1H);  $^{13}\text{C NMR}$  (100 MHz,  $\text{CDCl}_3$ )  $\delta$  (ppm) 195.7, 160.8, 135.9, 133.1, 132.4, 130.2, 129.7, 128.9, 128.7, 127.8, 127.0, 123.5, 122.0, 114.4, 81.2, 71.4, 65.6, 55.4, 45.1, 30.4; HRMS (ESI) for  $\text{C}_{24}\text{H}_{22}\text{O}_5\text{S}$   $[\text{M}+\text{Na}]^+$  calcd. 445.1188, found: 445.1084.

HPLC analysis: CHIRALPAK ID (Hexane/*i*-PrOH) = 60:40, flow rate = 1.0 mL/min, wave length = 215 nm,  $t_R = 55.996$  min (major),  $t_R = 70.721$  min (minor).

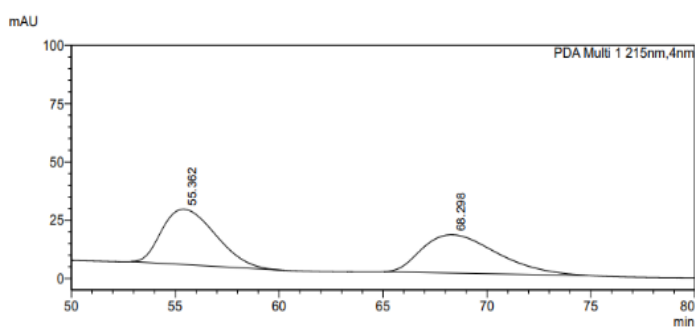

<Peak Table>

| PDA Ch1 215nm |           |         |        |        |
|---------------|-----------|---------|--------|--------|
| Peak#         | Ret. Time | Area    | Height | Aera%  |
| 1             | 55.362    | 4275313 | 23725  | 50.826 |
| 2             | 68.298    | 4136397 | 16407  | 49.174 |

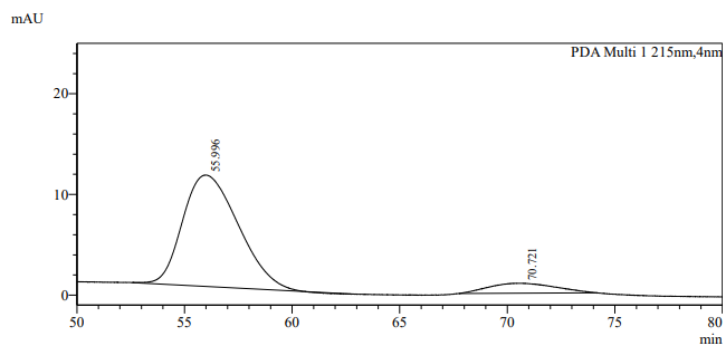

<Peak Table>

| PDA Ch1 215nm |           |         |        |        |
|---------------|-----------|---------|--------|--------|
| Peak#         | Ret. Time | Area    | Height | Aera%  |
| 1             | 55.996    | 1991024 | 11059  | 90.362 |
| 2             | 70.721    | 212351  | 989    | 9.638  |

**(R)-3-((2-([1,1'-biphenyl]-4-yl)-1-hydroxybut-3-yn-2-yl)sulfonyl)-1-(naphthalen-2-yl)propan-1-one (3d)**

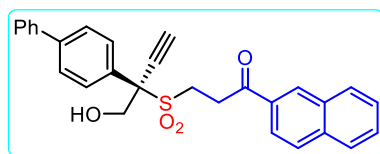

Purification by flash chromatography (*n*-hexane/ethyl acetate = 4/1), white solid, 80% yield, 93:7 er.  $[\alpha]_D^{25} = 7.4$  ( $c = 0.1$ ,  $\text{CHCl}_3$ );  $^1\text{H NMR}$  (400 MHz,  $\text{CDCl}_3$ )  $\delta$  (ppm) 8.39 (s, 1H), 7.96 – 7.83 (m, 6H), 7.67 (d,  $J = 8.3$  Hz, 2H), 7.62 – 7.51 (m, 4H), 7.40 (m, 3H), 4.82 (dd,  $J = 11.7, 6.5$  Hz, 1H), 4.27 (dd,  $J = 11.6, 6.9$  Hz, 1H), 3.89 (m, 1H), 3.65 (m, 2H), 3.54 – 3.41 (m, 1H), 3.12 (s, 1H), 2.85 (t,  $J = 6.3$  Hz, 1H);  $^{13}\text{C NMR}$  (100 MHz,  $\text{CDCl}_3$ )  $\delta$  (ppm) 195.6, 142.8, 139.8, 135.9, 133.1, 132.4, 130.1, 129.7, 129.3, 128.8, 127.9, 127.6, 127.1, 123.5, 81.5, 71.8, 65.6, 45.5, 30.5; HRMS (ESI) for  $\text{C}_{29}\text{H}_{24}\text{O}_4\text{S}$   $[\text{M}+\text{Na}]^+$  calcd. 491.1395, found: 491.1284.

HPLC analysis: CHIRALPAK ID (Hexane/*i*-PrOH) = 60:40, flow rate = 1.0 mL/min, wave length = 247 nm,  $t_R = 42.417$  min (major),  $t_R = 80.940$  min (minor).

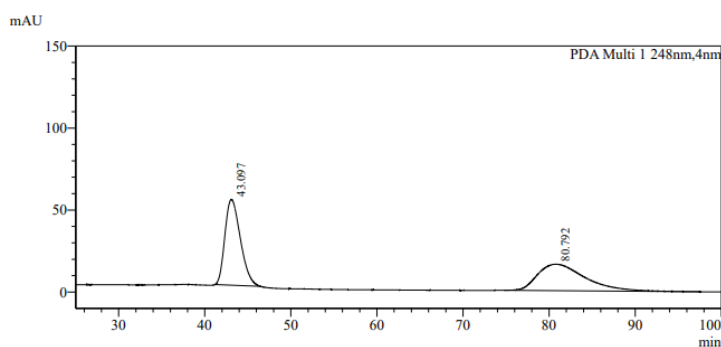

<Peak Table>

| PDA Ch1 248nm |           |         |        |        |
|---------------|-----------|---------|--------|--------|
| Peak#         | Ret. Time | Area    | Height | Aera%  |
| 1             | 43.097    | 6536979 | 52288  | 51.252 |
| 2             | 80.792    | 6217699 | 16143  | 48.748 |

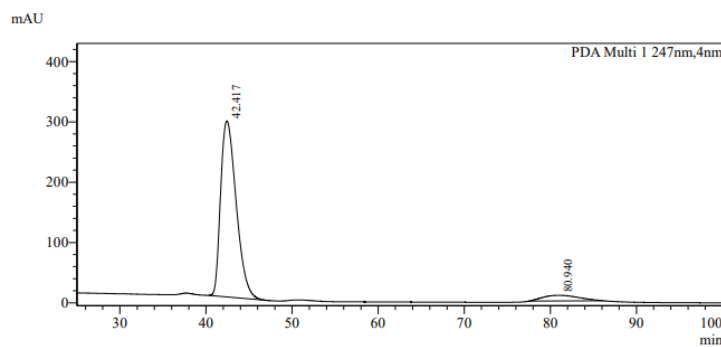

<Peak Table>

| PDA Ch1 247nm |           |          |        |        |
|---------------|-----------|----------|--------|--------|
| Peak#         | Ret. Time | Area     | Height | Aera%  |
| 1             | 42.417    | 36729547 | 291701 | 93.113 |
| 2             | 80.940    | 2716679  | 9368   | 6.887  |

**(R)-3-((2-(4-fluorophenyl)-1-hydroxybut-3-yn-2-yl)sulfonyl)-1-(naphthalen-2-yl)propan-1-one (3e)**

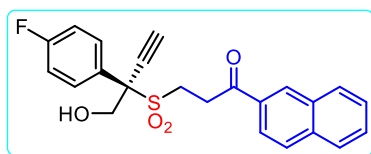

Purification by flash chromatography (*n*-hexane/ethyl acetate = 4/1). yellow solid, 75% yield, 90:10 er.  $[\alpha]_D^{25} = -7.1$  ( $c = 0.1$ ,  $\text{CHCl}_3$ );  $^1\text{H NMR}$  (400 MHz,  $\text{CDCl}_3$ )  $\delta$  (ppm) 8.44 (s, 1H), 8.00 – 7.93 (m, 2H), 7.90 – 7.81 (m, 4H), 7.60 (dt,  $J = 21.2, 6.9$  Hz, 2H), 7.15 (t,  $J = 8.6$  Hz, 2H), 4.74 (dd,  $J = 11.9, 7.0$  Hz, 1H), 4.19 (dd,  $J = 11.9, 7.0$  Hz, 1H), 3.94 – 3.85 (m, 1H), 3.72 – 3.51 (m, 3H), 3.10 (s, 1H), 2.84 (t,  $J = 7.2$  Hz, 1H);  $^{13}\text{C NMR}$  (100 MHz,  $\text{CDCl}_3$ )  $\delta$  (ppm) 195.6, 162.3 (d,  $J = 250.0$  Hz), 135.9, 133.1, 132.4, 130.9 (d,  $J = 8.0$  Hz), 130.2, 129.7, 129.0, 128.8, 127.8, 127.1, 126.1 (d,  $J = 3.0$  Hz), 123.5, 116.0 (d,  $J = 25.0$  Hz), 81.7, 77.2, 71.3, 65.8, 45.5, 30.3; HRMS (ESI) for  $\text{C}_{23}\text{H}_{19}\text{FO}_4\text{S}$   $[\text{M}+\text{Na}]^+$  calcd. 433.0988, found: 433.0881.

HPLC analysis: CHIRALPAK ID (Hexane/*i*-PrOH) = 70:30, flow rate = 0.7 mL/min, wave length = 248 nm,  $t_R = 46.057$  min (major),  $t_R = 69.506$  min (minor).

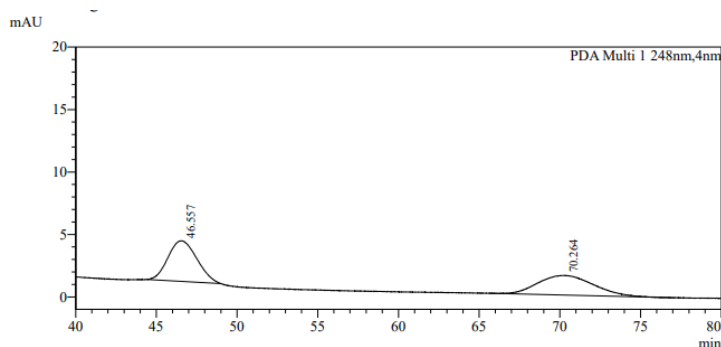

<Peak Table>

| PDA Ch1 248nm |           |        |        |        |
|---------------|-----------|--------|--------|--------|
| Peak#         | Ret. Time | Area   | Height | Aera%  |
| 1             | 46.557    | 404243 | 3246   | 51.858 |
| 2             | 70.264    | 375281 | 1574   | 48.142 |

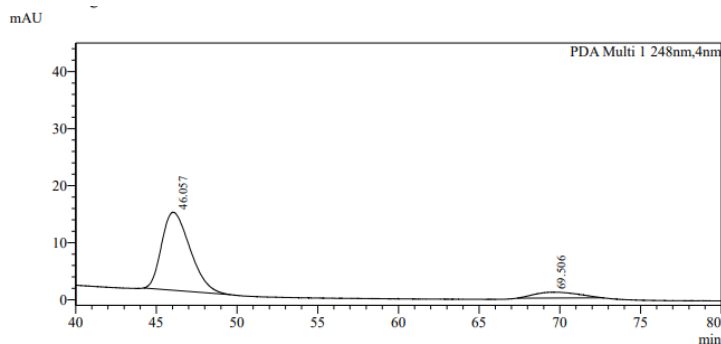

<Peak Table>

| PDA Ch1 248nm |           |         |        |        |
|---------------|-----------|---------|--------|--------|
| Peak#         | Ret. Time | Area    | Height | Aera%  |
| 1             | 46.057    | 1676353 | 13670  | 89.766 |
| 2             | 69.506    | 191109  | 1021   | 10.234 |

**(R)-3-((2-(4-chlorophenyl)-1-hydroxybut-3-yn-2-yl)sulfonyl)-1-(naphthalen-2-yl)propan-1-one (3f)**

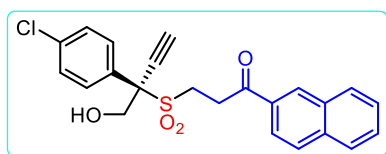

Purification by flash chromatography (*n*-hexane/ethyl acetate = 4/1). white solid, 80% yield, 93:7 er.  $[\alpha]_D^{25} = -6.4$  ( $c = 0.2$ ,  $\text{CHCl}_3$ );  $^1\text{H NMR}$  (400 MHz,  $\text{CDCl}_3$ )  $\delta$  (ppm) 8.43 (s, 1H), 7.96 (d,  $J = 8.4$  Hz, 2H), 7.92 – 7.84 (m, 2H), 7.78 (d,  $J = 8.7$  Hz, 2H), 7.59 (ddd,  $J = 14.9, 13.9, 6.9$  Hz, 2H), 7.43 (d,  $J = 8.7$  Hz, 2H), 4.73 (d,  $J = 11.8$  Hz, 1H), 4.19 (d,  $J = 11.8$  Hz, 1H), 3.93 – 3.84 (m, 1H), 3.70 – 3.49 (m, 3H), 3.11 (s, 1H), 2.91 (s, 1H);  $^{13}\text{C NMR}$  (100 MHz,  $\text{CDCl}_3$ )  $\delta$  (ppm) 195.6, 136.4, 135.9, 133.1, 132.4, 130.3, 130.2, 129.7, 129.2, 129.0, 128.9, 128.8, 127.8, 127.1, 123.5, 81.8, 71.4, 65.7, 45.6, 30.3; HRMS (ESI) for  $\text{C}_{23}\text{H}_{19}\text{ClO}_4\text{S}$   $[\text{M}+\text{Na}]^+$  calcd. 449.0693, found: 449.0580. HPLC analysis: CHIRALPAK ID (Hexane/*i*-PrOH) = 60:40, flow rate = 1.0 mL/min, wave length = 247 nm,  $t_R = 25.480$  min (major),  $t_R = 40.893$  min (minor).

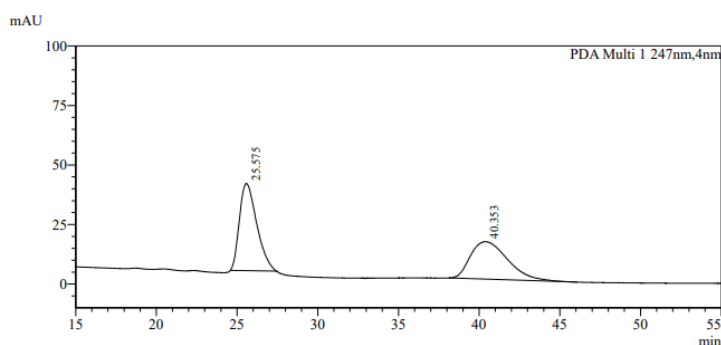

<Peak Table>

| PDA Ch1 247nm |           |         |        |        |
|---------------|-----------|---------|--------|--------|
| Peak#         | Ret. Time | Area    | Height | Aera%  |
| 1             | 25.575    | 2740585 | 36613  | 51.918 |
| 2             | 40.353    | 2538116 | 15722  | 48.082 |

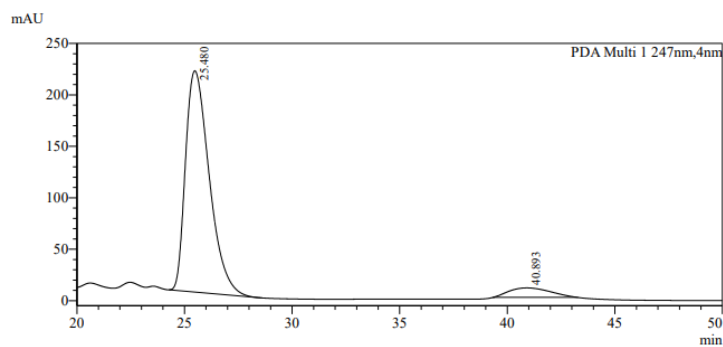

<Peak Table>

| PDA Ch1 247nm |           |          |        |        |
|---------------|-----------|----------|--------|--------|
| Peak#         | Ret. Time | Area     | Height | Aera%  |
| 1             | 25.480    | 16532222 | 215068 | 93.071 |
| 2             | 40.893    | 1230772  | 9216   | 6.929  |

**(R)-3-((2-(4-bromophenyl)-1-hydroxybut-3-yn-2-yl)sulfonyl)-1-(naphthalen-2-yl)propan-1-one (3g)**

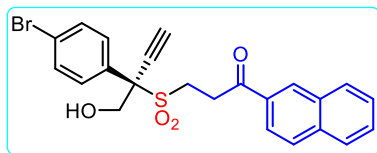

Purification by flash chromatography (*n*-hexane/ethyl acetate = 4/1). white solid, 56% yield, 94:6 er.  $[\alpha]_D^{25} = -10.5$  ( $c = 0.4$ ,  $\text{CHCl}_3$ );  $^1\text{H NMR}$  (400 MHz,  $\text{CDCl}_3$ )  $\delta$  (ppm) 8.44 (s, 1H), 7.97 (dd,  $J = 8.5, 1.4$  Hz, 2H), 7.91 – 7.85 (m, 2H), 7.74 – 7.68 (m, 2H), 7.64 – 7.55 (m, 4H), 4.72 (dd,  $J = 11.9, 6.9$  Hz, 1H), 4.19 (dd,  $J = 11.9, 7.0$  Hz, 1H), 3.92 – 3.84 (m, 1H), 3.72 – 3.50 (m, 3H), 3.10 (s, 1H), 2.86 (t,  $J = 7.1$  Hz, 1H);  $^{13}\text{C NMR}$  (100 MHz,  $\text{CDCl}_3$ )  $\delta$  (ppm) 195.5, 135.9, 133.0, 132.4, 132.1, 130.5, 130.2, 129.7, 129.4, 129.0, 128.8, 127.8, 127.1, 124.7, 123.5, 81.8, 71.5, 65.7, 45.6, 30.3; HRMS (ESI) for  $\text{C}_{23}\text{H}_{19}\text{BrO}_4\text{S}$   $[\text{M}+\text{Na}]^+$  calcd. 493.0187, found: 493.0080.

HPLC analysis: CHIRALPAK ID (Hexane/*i*-PrOH) = 60:40, flow rate = 1.0 mL/min, wave length = 247 nm,  $t_R = 28.172$  min (major),  $t_R = 47.245$  min (minor).

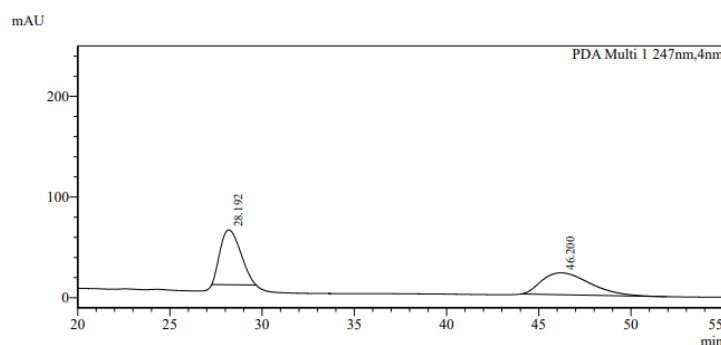

<Peak Table>

| PDA Ch1 247nm |           |         |        |        |
|---------------|-----------|---------|--------|--------|
| Peak#         | Ret. Time | Area    | Height | Aera%  |
| 1             | 28.192    | 4196505 | 54485  | 51.258 |
| 2             | 46.200    | 3990520 | 21772  | 48.742 |

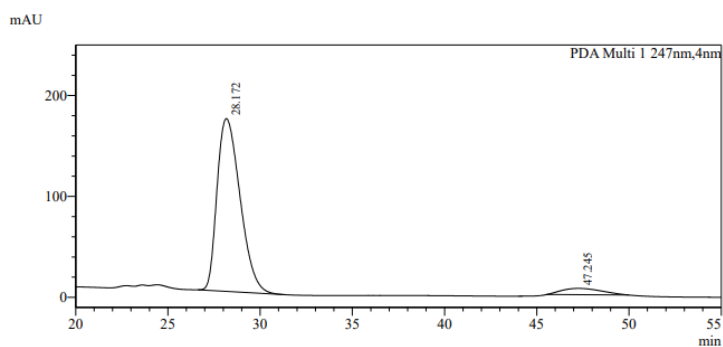

<Peak Table>

| PDA Ch1 247nm |           |          |        |        |
|---------------|-----------|----------|--------|--------|
| Peak#         | Ret. Time | Area     | Height | Aera%  |
| 1             | 28.172    | 14896825 | 171252 | 94.003 |
| 2             | 47.245    | 950430   | 6274   | 5.997  |

**(R)-3-((1-hydroxy-2-(3-methoxyphenyl)but-3-yn-2-yl)sulfonyl)-1-(naphthalen-2-yl)propan-1-one (3h)**

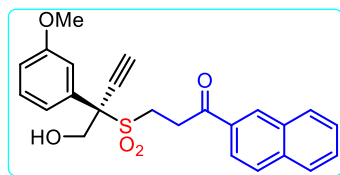

Purification by flash chromatography (*n*-hexane/ethyl acetate = 4/1). yellow solid, 65% yield, 92:8 er.  $[\alpha]_D^{25} = -6.7$  ( $c = 0.1$ ,  $\text{CHCl}_3$ );

$^1\text{H NMR}$  (400 MHz,  $\text{CDCl}_3$ )  $\delta$  (ppm) 8.40 (s, 1H), 7.97 – 7.91 (m, 2H), 7.87 – 7.84 (m, 2H), 7.58 (ddd,  $J = 15.0, 13.8, 6.9$  Hz, 2H), 7.45 – 7.34 (m, 3H), 6.96 (dd,  $J = 8.1, 1.7$  Hz, 1H), 4.75 (dd,  $J =$

11.8, 5.9 Hz, 1H), 4.20 (dd,  $J = 11.8, 6.1$  Hz, 1H), 3.86 – 3.79 (m, 4H), 3.66 – 3.45 (m, 3H), 3.09 (s, 1H), 2.94 (s, 1H);  $^{13}\text{C NMR}$  (100 MHz,  $\text{CDCl}_3$ )  $\delta$  (ppm) 195.7, 159.8, 135.8, 133.1, 132.4, 131.8, 130.2, 130.0, 129.7, 128.9, 128.7, 127.8, 127.0, 123.5, 121.0, 115.1, 81.5, 71.9, 65.7, 55.4, 45.5, 30.4; HRMS (ESI) for  $\text{C}_{24}\text{H}_{22}\text{O}_5\text{S}$   $[\text{M}+\text{Na}]^+$  calcd. 445.1188, found: 445.1084.

HPLC analysis: CHIRALPAK ID (Hexane/*i*-PrOH) = 60:40, flow rate = 1.0 mL/min, wave length = 248 nm,  $t_R = 42.083$  min (major),  $t_R = 53.241$  min (minor).

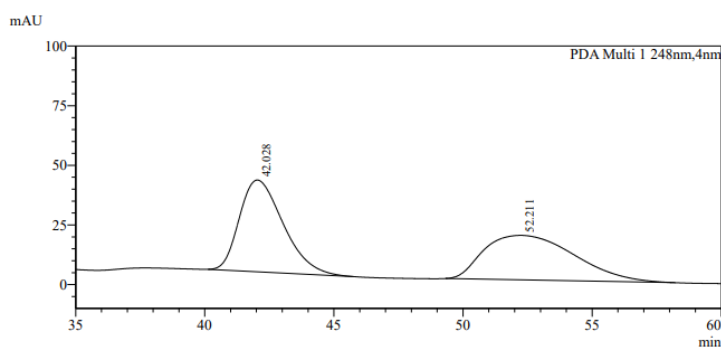

<Peak Table>

| PDA Ch1 248nm |           |         |        |        |
|---------------|-----------|---------|--------|--------|
| Peak#         | Ret. Time | Area    | Height | Aera%  |
| 1             | 42.028    | 4544700 | 38455  | 49.959 |
| 2             | 52.211    | 4552090 | 18645  | 50.041 |

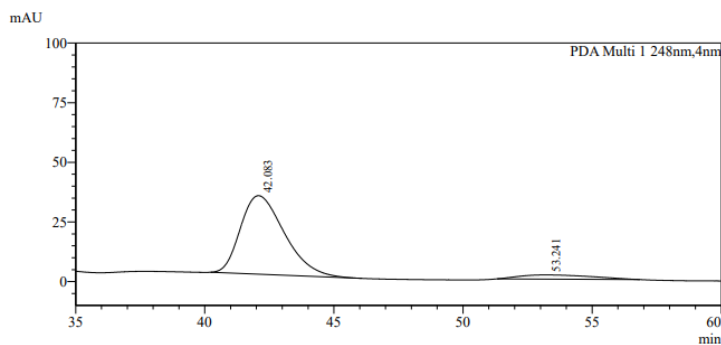

<Peak Table>

| PDA Ch1 248nm |           |         |        |        |
|---------------|-----------|---------|--------|--------|
| Peak#         | Ret. Time | Area    | Height | Aera%  |
| 1             | 42.083    | 3903259 | 32920  | 91.996 |
| 2             | 53.241    | 339597  | 1735   | 8.004  |

**(R)-3-((2-(3-chlorophenyl)-1-hydroxybut-3-yn-2-yl)sulfonyl)-1-(naphthalen-2-yl)propan-1-one (3i)**

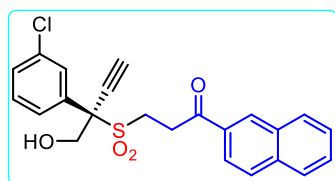

Purification by flash chromatography (*n*-hexane/ethyl acetate = 4/1). white solid, 60% yield, 92.5:7.5 er.  $[\alpha]_D^{25} = -6.8$  ( $c = 0.19$ ,  $\text{CHCl}_3$ );  $^1\text{H NMR}$  (400 MHz,  $\text{CDCl}_3$ )  $\delta$  (ppm) 8.43 (s, 1H), 7.99 – 7.92 (m, 2H), 7.88 – 7.85 (m, 3H), 7.73 (d,  $J = 7.6$  Hz, 1H), 7.65 – 7.52 (m, 2H), 7.46 – 7.33 (m, 2H), 4.72 (d,  $J = 11.8$  Hz, 1H), 4.18 (d,  $J = 11.8$  Hz, 1H), 3.95 – 3.85 (m, 1H), 3.75 – 3.51 (m, 3H), 3.13 (s, 1H), 3.05 (s, 1H);  $^{13}\text{C NMR}$  (100 MHz,  $\text{CDCl}_3$ )  $\delta$  (ppm) 195.6, 135.9, 135.0, 133.0, 132.4, 130.4, 130.1, 129.7, 129.1, 128.7, 127.8, 127.0, 123.5, 82.0, 76.9, 71.5, 65.8, 45.8, 30.3; HRMS (ESI) for  $\text{C}_{23}\text{H}_{19}\text{ClO}_4\text{S}$   $[\text{M}+\text{Na}]^+$  calcd. 449.0693, found: 449.0582.

HPLC analysis: CHIRALPAK AD-H (Hexane/*i*-PrOH) = 70:30, flow rate = 1.0 mL/min, wave length = 247 nm,  $t_R = 19.789$  min (minor),  $t_R = 22.710$  min (major).

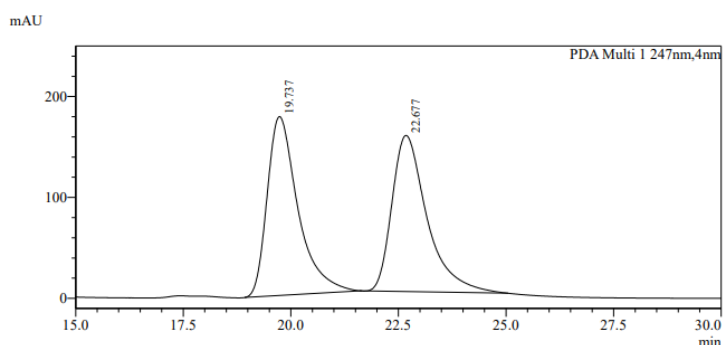

<Peak Table>

| PDA Ch1 247nm |           |         |        |        |
|---------------|-----------|---------|--------|--------|
| Peak#         | Ret. Time | Area    | Height | Aera%  |
| 1             | 19.737    | 8822615 | 177290 | 50.088 |
| 2             | 22.677    | 8791574 | 154762 | 49.912 |

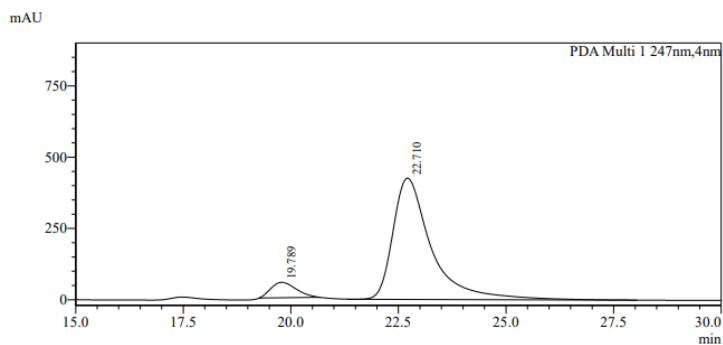

<Peak Table>

| PDA Ch1 247nm |           |          |        |        |
|---------------|-----------|----------|--------|--------|
| Peak#         | Ret. Time | Area     | Height | Aera%  |
| 1             | 19.789    | 2204560  | 54097  | 7.705  |
| 2             | 22.710    | 26406777 | 425171 | 92.295 |

**(R)-3-((2-(3-bromophenyl)-1-hydroxybut-3-yn-2-yl)sulfonyl)-1-(naphthalen-2-yl)propan-1-one (3j)**

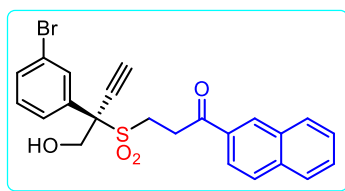

Purification by flash chromatography (*n*-hexane/ethyl acetate = 4/1). yellow solid, 65% yield, 92.5:7.5 er.  $[\alpha]_D^{25} = 9.2$  ( $c = 0.5$ ,  $\text{CHCl}_3$ );  $^1\text{H NMR}$  (400 MHz,  $\text{CDCl}_3$ )  $\delta$  (ppm) 8.42 (s, 1H), 8.01 – 7.92 (m, 3H), 7.86 (dd,  $J = 8.1, 6.1$  Hz, 2H), 7.77 (d,  $J = 8.0$  Hz, 1H), 7.64 – 7.52 (m, 3H), 7.31 (t,  $J = 8.0$  Hz, 1H), 4.71 (d,  $J = 11.9$  Hz, 1H), 4.18 (d,  $J = 11.8$  Hz, 1H), 3.90 (td,  $J = 10.9, 2.3$  Hz, 1H), 3.73 – 3.60 (m, 2H), 3.59 – 3.46 (m, 1H), 3.13 (s, 1H), 3.04 (s, 1H);  $^{13}\text{C NMR}$  (100 MHz,  $\text{CDCl}_3$ )  $\delta$  (ppm) 195.6, 135.9, 133.1, 132.6, 132.4, 132.0, 130.3, 129.7, 129.0, 128.7, 127.8, 127.5, 127.1, 123.5, 123.0, 82.1, 71.5, 65.8, 45.8, 30.3; HRMS (ESI) for  $\text{C}_{23}\text{H}_{19}\text{BrO}_4\text{S}$   $[\text{M}+\text{Na}]^+$  calcd. 493.0187, found: 493.0081.

HPLC analysis: CHIRALPAK AD-H (Hexane/*i*-PrOH) = 70:30, flow rate = 1.0 mL/min, wave length = 247 nm,  $t_R = 22.833$  min (minor),  $t_R = 26.192$  min (major).

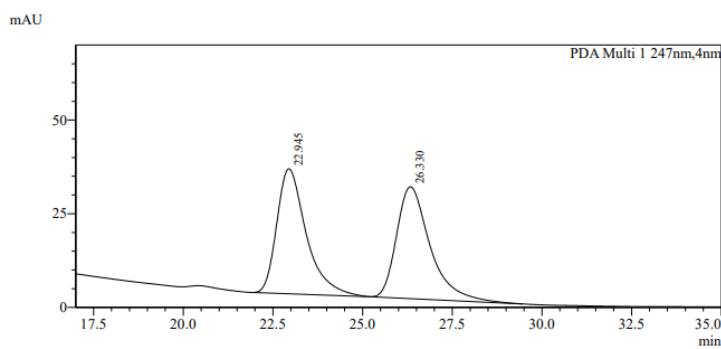

<Peak Table>

| PDA Ch1 247nm |           |         |        |        |
|---------------|-----------|---------|--------|--------|
| Peak#         | Ret. Time | Area    | Height | Aera%  |
| 1             | 22.945    | 1906744 | 33357  | 49.524 |
| 2             | 26.330    | 1943436 | 29822  | 50.476 |

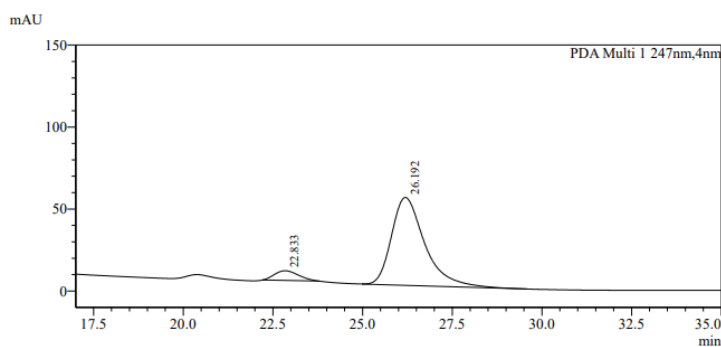

<Peak Table>

| PDA Ch1 247nm |           |         |        |        |
|---------------|-----------|---------|--------|--------|
| Peak#         | Ret. Time | Area    | Height | Aera%  |
| 1             | 22.833    | 276882  | 5919   | 7.386  |
| 2             | 26.192    | 3471702 | 53563  | 92.614 |



**(R)-3-((2-(2-fluorophenyl)-1-hydroxybut-3-yn-2-yl)sulfonyl)-1-(naphthalen-2-yl)propan-1-one (3k)**

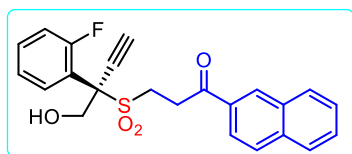

Purification by flash chromatography (*n*-hexane/ethyl acetate = 4/1). white solid 38% yield, 91:9 er.  $[\alpha]_D^{25} = -6.9$  ( $c = 0.16$ ,  $\text{CHCl}_3$ );

$^1\text{H NMR}$  (400 MHz,  $\text{CDCl}_3$ )  $\delta$  (ppm) 8.46 (s, 1H), 8.00 – 7.92 (m, 3H), 7.92 – 7.84 (m, 2H), 7.59 (dt,  $J = 21.1, 7.2$  Hz, 2H), 7.49

– 7.40 (m, 1H), 7.26 (t,  $J = 7.6$  Hz, 1H), 7.15 (dd,  $J = 12.0, 8.5$  Hz, 1H), 5.02 (d,  $J = 11.9$  Hz, 1H), 4.42 (dd,  $J = 12.0, 5.2$  Hz, 1H), 3.99 – 3.88 (m, 1H), 3.79 – 3.57 (m, 3H), 3.09 (s, 1H), 2.84 (s, 1H);  $^{13}\text{C NMR}$  (100 MHz,  $\text{CDCl}_3$ )  $\delta$  (ppm) 195.6, 161.3 (d,  $J = 251$  Hz), 135.9, 133.1, 132.7 (d,  $J = 3$  Hz), 132.4, 132.2, 132.1, 130.2, 129.7, 128.9, 128.7, 127.8, 127.1, 124.7 (d,  $J = 3$  Hz), 123.5, 117.5, 117.5 (d,  $J = 11$  Hz), 117.3, 81.3, 72.2 (d,  $J = 5$  Hz), 64.1 (d,  $J = 13$  Hz), 45.3, 30.3; HRMS (ESI) for  $\text{C}_{23}\text{H}_{19}\text{FO}_4\text{S}$   $[\text{M}+\text{Na}]^+$  calcd. 433.0988, found: 433.0884.

HPLC analysis: CHIRALPAK ID (Hexane/*i*-PrOH) = 60:40, flow rate = 1.0 mL/min, wave length = 247 nm,  $t_R = 29.116$  min (minor),  $t_R = 35.372$  min (major).

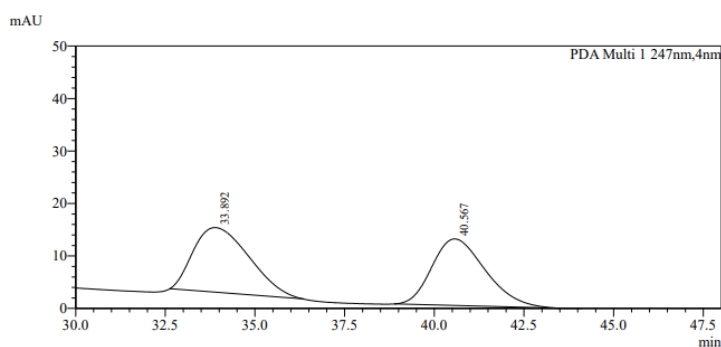

<Peak Table>

| PDA Ch1 247nm |           |         |        |        |
|---------------|-----------|---------|--------|--------|
| Peak#         | Ret. Time | Area    | Height | Aera%  |
| 1             | 33.892    | 1336425 | 12302  | 50.464 |
| 2             | 40.567    | 1311874 | 12681  | 49.536 |

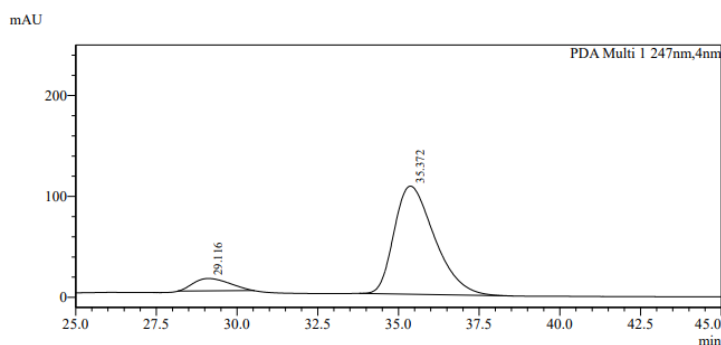

<Peak Table>

| PDA Ch1 247nm |           |         |        |        |
|---------------|-----------|---------|--------|--------|
| Peak#         | Ret. Time | Area    | Height | Aera%  |
| 1             | 29.116    | 950942  | 12273  | 9.210  |
| 2             | 35.372    | 9374576 | 107163 | 90.790 |

**(R)-3-((2-(3,4-dichlorophenyl)-1-hydroxybut-3-yn-2-yl)sulfonyl)-1-(naphthalen-2-yl)propan-1-one (3I)**

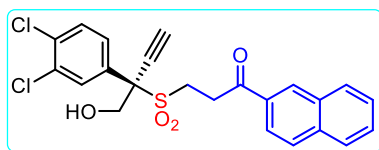

Purification by flash chromatography (*n*-hexane/ethyl acetate = 4/1). white solid, 80% yield, 92:8 er.  $[\alpha]_D^{25} = -5.8$  ( $c = 0.1$ ,  $\text{CHCl}_3$ );  $^1\text{H NMR}$  (400 MHz,  $\text{CDCl}_3$ )  $\delta$  (ppm) 8.46 (s, 1H), 8.00 – 7.94 (m, 3H), 7.92 – 7.85 (m, 2H), 7.68 (dd,  $J = 8.5, 2.3$  Hz, 1H), 7.65 – 7.54 (m, 2H), 7.52 (d,  $J = 8.5$  Hz, 1H), 4.68 (d,  $J = 11.8$  Hz, 1H), 4.18 (d,  $J = 11.8$  Hz, 1H), 3.97 – 3.87 (m, 1H), 3.76 – 3.55 (m, 3H), 3.13 (s, 1H), 2.91 (s, 1H);  $^{13}\text{C NMR}$  (100 MHz,  $\text{CDCl}_3$ )  $\delta$  (ppm) 195.5, 135.9, 134.7, 133.3, 133.0, 132.4, 131.0, 130.8, 130.5, 130.2, 129.7, 129.0, 128.8, 128.1, 127.8, 127.1, 123.5, 82.2, 71.1, 65.8, 45.9, 30.3; HRMS (ESI) for  $\text{C}_{23}\text{H}_{18}\text{Cl}_2\text{O}_4\text{S}$   $[\text{M}+\text{Na}]^+$  calcd. 483.0303, found: 483.0195.

HPLC analysis: CHIRALPAK OZ-H (Hexane/*i*-PrOH) = 70:30, flow rate = 1.0 mL/min, wave length = 245 nm,  $t_R = 16.277$  min (minor),  $t_R = 21.573$  min (major).

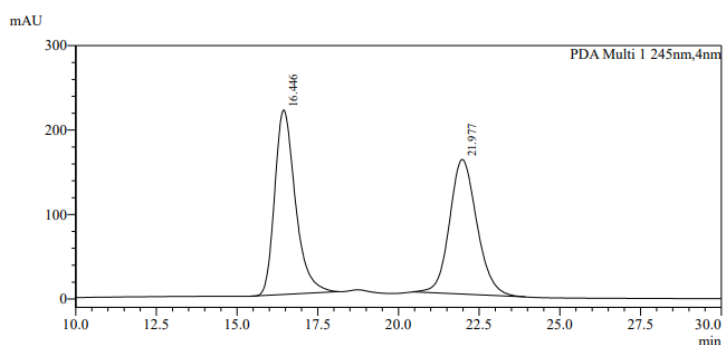

<Peak Table>

| PDA Ch1 245nm |           |         |        |        |
|---------------|-----------|---------|--------|--------|
| Peak#         | Ret. Time | Area    | Height | Aera%  |
| 1             | 16.446    | 9754295 | 218494 | 50.899 |
| 2             | 21.977    | 9409613 | 159437 | 49.101 |

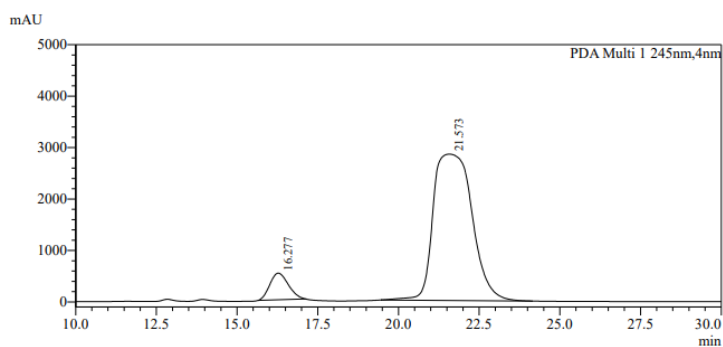

<Peak Table>

| PDA Ch1 245nm |           |           |         |        |
|---------------|-----------|-----------|---------|--------|
| Peak#         | Ret. Time | Area      | Height  | Aera%  |
| 1             | 16.277    | 20730899  | 518981  | 7.987  |
| 2             | 21.573    | 238839519 | 2845219 | 92.013 |

**(R)-3-((2-(3,4-dimethoxyphenyl)-1-hydroxybut-3-yn-2-yl)sulfonyl)-1-(naphthalen-2-yl)propan-1-one (3m)**

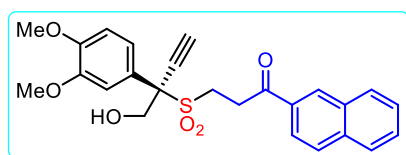

Purification by flash chromatography (*n*-hexane/ethyl acetate = 4/1). white solid, 68% yield, 86.5:13.5 er.  $[\alpha]_D^{25} = -14.1$  ( $c = 0.13$ ,  $\text{CHCl}_3$ );  $^1\text{H NMR}$  (400 MHz,  $\text{CDCl}_3$ )  $\delta$  (ppm) 8.42 (s, 1H), 7.97 (d,  $J = 8.3$  Hz, 2H), 7.93 – 7.85 (m, 2H), 7.66 – 7.54 (m, 2H), 7.41 (dd,  $J = 8.5$ , 2.0 Hz, 1H), 7.35 (d,  $J = 2.0$  Hz, 1H), 6.91 (d,  $J = 8.5$  Hz, 1H), 4.74 (dd,  $J = 11.7$ , 4.9 Hz, 1H), 4.21 (dd,  $J = 11.8$ , 5.2 Hz, 1H), 3.93 (s, 3H), 3.89 – 3.81 (m, 4H), 3.65 – 3.47 (m, 3H), 3.08 (s, 1H), 2.74 (s, 1H);  $^{13}\text{C NMR}$  (100 MHz,  $\text{CDCl}_3$ )  $\delta$  (ppm) 195.6, 150.4, 149.1, 135.9, 133.1, 132.4, 130.2, 129.7, 128.9, 128.7, 127.8, 127.1, 123.5, 122.3, 121.7, 111.7, 111.1, 81.3, 71.7, 65.7, 56.0, 45.2, 30.4; HRMS (ESI) for  $\text{C}_{25}\text{H}_{24}\text{O}_6\text{S}$   $[\text{M}+\text{Na}]^+$  calcd. 475.1294, found: 475.1182.

CHIRALPAK AD-H (Hexane/*i*-PrOH) = 70:30, flow rate = 0.7 mL/min, wave length = 247 nm,  $t_R = 43.667$  min (major),  $t_R = 49.758$  min (minor).

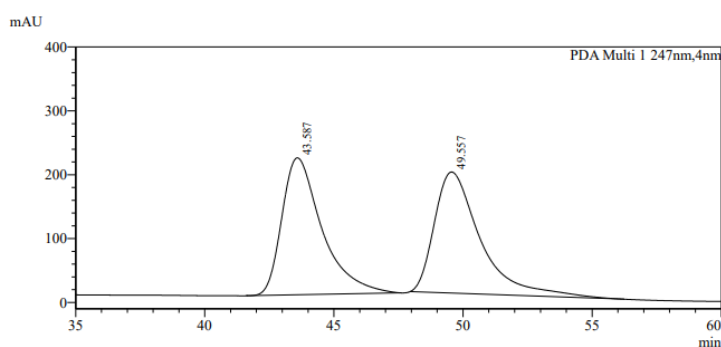

<Peak Table>

| PDA Ch1 247nm |           |          |        |        |
|---------------|-----------|----------|--------|--------|
| Peak#         | Ret. Time | Area     | Height | Aera%  |
| 1             | 43.587    | 23170888 | 214477 | 49.620 |
| 2             | 49.557    | 23525778 | 189657 | 50.380 |

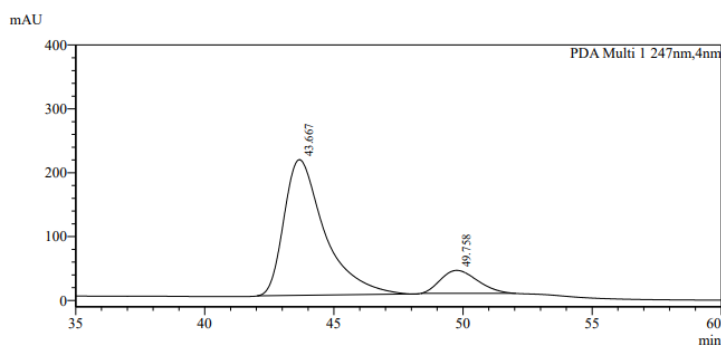

<Peak Table>

| PDA Ch1 247nm |           |          |        |        |
|---------------|-----------|----------|--------|--------|
| Peak#         | Ret. Time | Area     | Height | Aera%  |
| 1             | 43.667    | 23285040 | 212508 | 86.661 |
| 2             | 49.758    | 3583946  | 35956  | 13.339 |

**(R)-4-((2-(3,4-dichlorophenyl)-1-hydroxybut-3-yn-2-yl)sulfonyl)-1-phenylbutan-2-one (3n)**

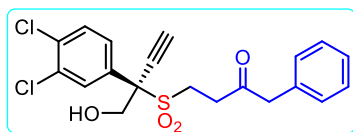

Purification by flash chromatography (*n*-hexane/ethyl acetate = 4/1). white solid, 80% yield, 92:8 er.  $[\alpha]_D^{25} = -19.1$  ( $c = 0.6$ ,  $\text{CHCl}_3$ );

$^1\text{H NMR}$  (400 MHz,  $\text{CDCl}_3$ )  $\delta$  (ppm) 7.85 (d,  $J = 2.2$  Hz, 1H), 7.59 (dd,  $J = 8.5, 2.2$  Hz, 1H), 7.48 (d,  $J = 8.5$  Hz, 1H), 7.35 –

7.28 (m, 3H), 7.20 – 7.15 (m, 2H), 4.57 (dd,  $J = 11.8, 6.8$  Hz, 1H), 4.08 (dd,  $J = 11.8, 6.4$  Hz, 1H), 3.73 (s, 2H), 3.69 – 3.60 (m, 1H), 3.48 – 3.38 (m, 1H), 3.03 (s, 1H), 3.00 – 2.96 (m, 1H), 2.94 – 2.84 (m, 2H);  $^{13}\text{C NMR}$  (100 MHz,  $\text{CDCl}_3$ )  $\delta$  (ppm) 204.2, 134.6, 133.2, 133.1, 130.9, 130.7, 130.4, 129.4, 129.0, 128.0, 127.5, 82.1, 70.9, 65.7, 50.0, 47.8, 45.6, 33.7, 33.2; HRMS (ESI) for  $\text{C}_{20}\text{H}_{18}\text{Cl}_2\text{O}_4\text{S}$   $[\text{M}+\text{Na}]^+$  calcd. 447.0303, found: 447.0146.

CHIRALPAK AD-H (Hexane/*i*-PrOH) = 90:10, flow rate = 1.0 mL/min, wave length = 207 nm,  $t_R = 48.257$  min (major),  $t_R = 53.804$  min (minor).

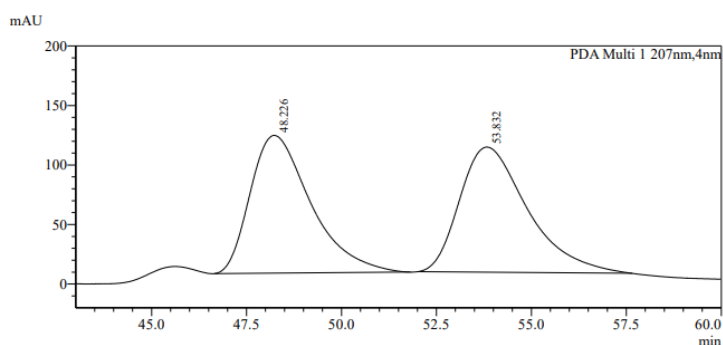

<Peak Table>

| PDA Ch1 207nm |           |          |        |        |
|---------------|-----------|----------|--------|--------|
| Peak#         | Ret. Time | Area     | Height | Aera%  |
| 1             | 48.226    | 12840528 | 115746 | 49.515 |
| 2             | 53.832    | 13092174 | 105172 | 50.485 |

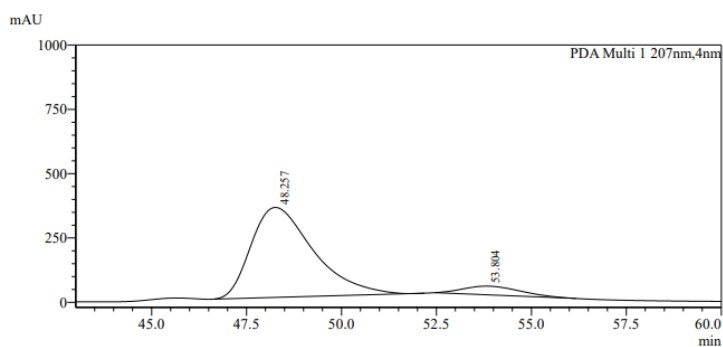

<Peak Table>

| PDA Ch1 207nm |           |          |        |        |
|---------------|-----------|----------|--------|--------|
| Peak#         | Ret. Time | Area     | Height | Aera%  |
| 1             | 48.257    | 39913766 | 349673 | 91.873 |
| 2             | 53.804    | 3530714  | 33386  | 8.127  |

**(R)-1-(4-chlorophenyl)-4-((2-(3,4-dichlorophenyl)-1-hydroxybut-3-yn-2-yl)sulfonyl)butan-2-one (3o)**

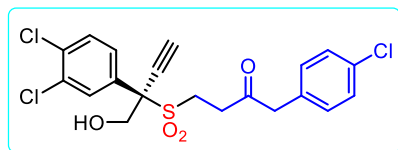

Purification by flash chromatography (*n*-hexane/ethyl acetate = 4/1). white solid, 82% yield, 93:7 er.  $[\alpha]_D^{25} = -9.7$  ( $c = 0.69$ ,  $\text{CHCl}_3$ );  $^1\text{H NMR}$  (400 MHz,  $\text{CDCl}_3$ )  $\delta$  (ppm) 7.86 (s, 1H), 7.59 (d,  $J = 8.2$  Hz, 1H), 7.49 (d,  $J = 8.4$  Hz, 1H), 7.30 (d,  $J = 7.8$  Hz, 2H), 7.13 – 7.09 (m, 2H), 4.58 (d,  $J = 10.5$  Hz, 1H), 4.09 (d,  $J = 10.9$  Hz, 1H), 3.74 – 3.64 (m, 3H), 3.52 – 3.41 (m, 1H), 3.06 – 2.89 (m, 4H);  $^{13}\text{C NMR}$  (100 MHz,  $\text{CDCl}_3$ )  $\delta$  (ppm) 203.6, 134.7, 133.5, 133.3, 131.5, 130.9, 130.8, 130.7, 130.3, 129.1, 128.0, 82.1, 71.0, 65.7, 49.1, 49.0, 47.8, 45.5, 33.9, 33.3; HRMS (ESI) for  $\text{C}_{20}\text{H}_{17}\text{Cl}_3\text{O}_4\text{S}$   $[\text{M}+\text{Na}]^+$  calcd. 480.9913, found: 480.9803. CHIRALPAK AD-H (Hexane/*i*-PrOH) = 90:10, flow rate = 1.0 mL/min, wave length = 206 nm,  $t_R = 68.838$  min (major),  $t_R = 70.502$  min (minor).

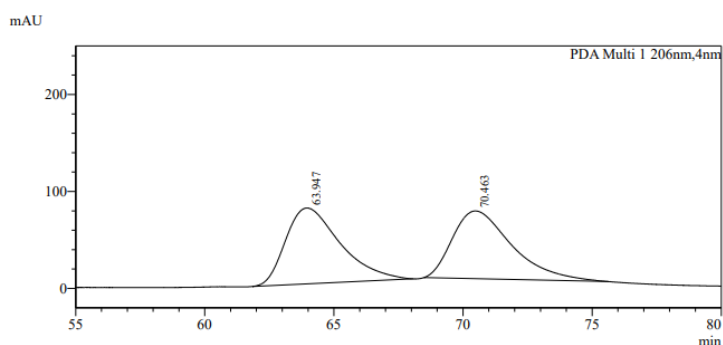

<Peak Table>

| PDA Ch1 206nm |           |          |        |        |
|---------------|-----------|----------|--------|--------|
| Peak#         | Ret. Time | Area     | Height | Aera%  |
| 1             | 63.947    | 11497572 | 78250  | 50.762 |
| 2             | 70.463    | 11152212 | 69869  | 49.238 |

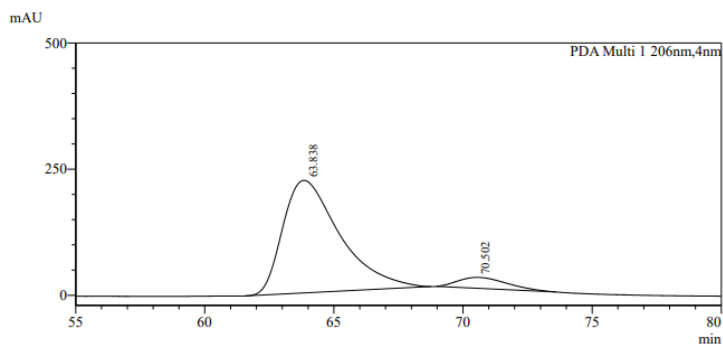

<Peak Table>

| PDA Ch1 206nm |           |          |        |        |
|---------------|-----------|----------|--------|--------|
| Peak#         | Ret. Time | Area     | Height | Aera%  |
| 1             | 63.838    | 34346409 | 223056 | 92.331 |
| 2             | 70.502    | 2852893  | 21354  | 7.669  |

**(R)-1-(4-bromophenyl)-4-((2-(3,4-dichlorophenyl)-1-hydroxybut-3-yn-2-yl)sulfonyl)butan-2-one (3p)**

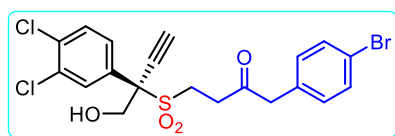

Purification by flash chromatography (*n*-hexane/ethyl acetate = 4/1). white solid, 65% yield, 91:9 er.  $[\alpha]_D^{25} = 5.4$  ( $c = 0.17$ ,  $\text{CHCl}_3$ );  $^1\text{H NMR}$  (400 MHz,  $\text{CDCl}_3$ )  $\delta$  (ppm) 7.86 (d,  $J = 2.0$  Hz, 1H), 7.60 (dd,  $J = 8.5, 2.1$  Hz, 1H), 7.50 – 7.45 (m, 3H), 7.06 (t,  $J = 7.5$  Hz, 3H), 4.60 (d,  $J = 11.9$  Hz, 1H), 4.10 (d,  $J = 11.8$  Hz, 1H), 3.73 (s, 2H), 3.69 – 3.62 (m, 1H), 3.51 – 3.39 (m, 1H), 3.26 (t,  $J = 7.0$  Hz, 1H), 3.06 (s, 1H), 3.01 – 2.98 (m, 1H);  $^{13}\text{C NMR}$  (100 MHz,  $\text{CDCl}_3$ )  $\delta$  (ppm) 203.4, 134.7, 133.3, 132.0, 131.2, 130.9, 130.7, 130.3, 128.0, 121.6, 82.1, 71.0, 65.8, 49.2, 47.9, 45.5, 33.9, 33.3; HRMS (ESI) for  $\text{C}_{20}\text{H}_{17}\text{BrCl}_2\text{O}_4\text{S}$   $[\text{M}+\text{H}]^+$  calcd. 502.9408, found: 502.0252.

CHIRALPAK AY-H (Hexane/*i*-PrOH) = 80:20, flow rate = 1.0 mL/min, wave length = 203 nm,  $t_R = 20.225$  min (major),  $t_R = 26.165$  min (minor).

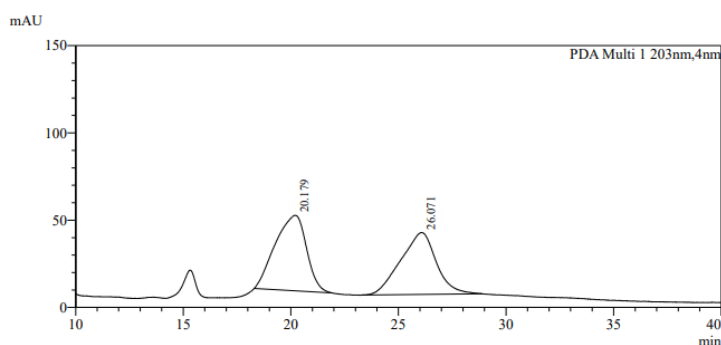

<Peak Table>

| PDA Ch1 203nm |           |         |        |        |
|---------------|-----------|---------|--------|--------|
| Peak#         | Ret. Time | Area    | Height | Aera%  |
| 1             | 20.179    | 4367166 | 43235  | 51.605 |
| 2             | 26.071    | 4095465 | 35499  | 48.395 |

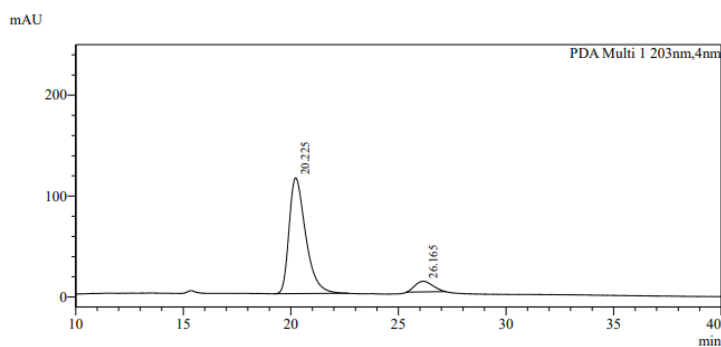

<Peak Table>

| PDA Ch1 203nm |           |         |        |        |
|---------------|-----------|---------|--------|--------|
| Peak#         | Ret. Time | Area    | Height | Aera%  |
| 1             | 20.225    | 6164126 | 114791 | 91.087 |
| 2             | 26.165    | 603205  | 10556  | 8.913  |

**(R)-4-((2-(3,4-dichlorophenyl)-1-hydroxybut-3-yn-2-yl)sulfonyl)-1-(3,4-dimethoxyphenyl)butan-2-one (3g)**

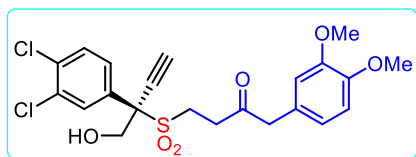

Purification by flash chromatography (*n*-hexane/ethyl acetate = 4/1). yellow solid, 76% yield, 90.5:9.5 er.  $[\alpha]_D^{25} = -15.2$  ( $c = 0.1$ ,  $\text{CHCl}_3$ );  $^1\text{H NMR}$  (400 MHz,  $\text{CDCl}_3$ )  $\delta$  (ppm) 7.86 (d,  $J = 2.2$  Hz, 1H), 7.60 (dd,  $J = 8.5, 2.3$  Hz, 1H), 7.49 (d,  $J = 8.5$  Hz, 1H), 6.83 (d,  $J = 8.1$  Hz, 1H), 6.72 (dd,  $J =$

8.1, 1.9 Hz, 1H), 6.68 (d,  $J = 1.8$  Hz, 1H), 4.59 (dd,  $J = 11.9, 7.1$  Hz, 1H), 4.10 (dd,  $J = 11.9, 6.7$  Hz, 1H), 3.86 (d,  $J = 4.0$  Hz, 6H), 3.68 – 3.63 (m, 3H), 3.47 – 3.38 (m, 1H), 3.05 (s, 1H), 3.02 – 2.81 (m, 3H);  $^{13}\text{C NMR}$  (100 MHz,  $\text{CDCl}_3$ )  $\delta$  (ppm) 204.5, 149.2, 148.4, 134.6, 133.2, 130.9, 130.7, 130.4, 128.0, 125.6, 121.7, 112.3, 111.5, 82.1, 70.9, 65.7, 55.9, 49.6, 45.5, 32.9; HRMS (ESI) for  $\text{C}_{22}\text{H}_{22}\text{Cl}_2\text{O}_6\text{S}$   $[\text{M}+\text{Na}]^+$  calcd. 507.0514, found: 507.0407.

CHIRALPAK AD-H (Hexane/*i*-PrOH) = 70:30, flow rate = 1.0 mL/min, wave length = 206 nm,  $t_R = 13.397$  min (major),  $t_R = 19.992$  min (minor).

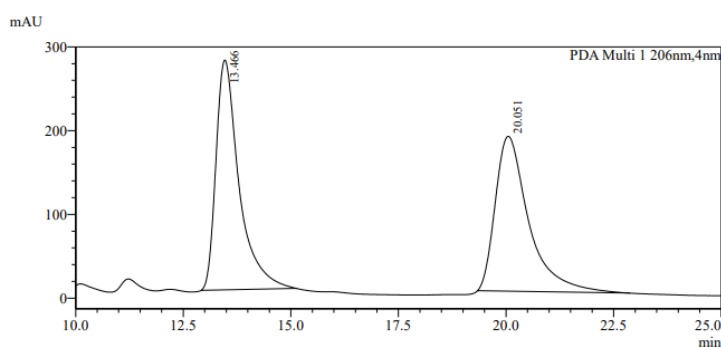

<Peak Table>

| PDA Ch1 206nm |           |          |        |        |
|---------------|-----------|----------|--------|--------|
| Peak#         | Ret. Time | Area     | Height | Aera%  |
| 1             | 13.466    | 10230610 | 274268 | 50.587 |
| 2             | 20.051    | 9993133  | 184855 | 49.413 |

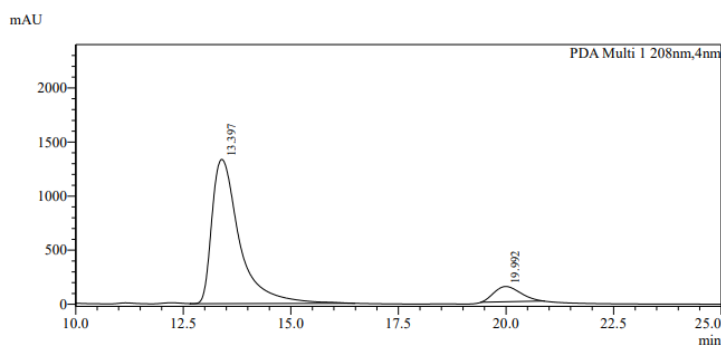

<Peak Table>

| PDA Ch1 208nm |           |          |         |        |
|---------------|-----------|----------|---------|--------|
| Peak#         | Ret. Time | Area     | Height  | Aera%  |
| 1             | 13.397    | 59494239 | 1332736 | 90.685 |
| 2             | 19.992    | 6110835  | 141583  | 9.315  |

**(R)-1-(3,4-dichlorophenyl)-4-((2-(3,4-dichlorophenyl)-1-hydroxybut-3-yn-2-yl)sulfonyl)butan-2-one (3r)**

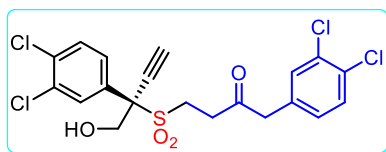

Purification by flash chromatography (*n*-hexane/ethyl acetate = 4/1); white solid, 48% yield, 90:10 er.  $[\alpha]_D^{25} = -10.9$  ( $c = 0.1$ ,  $\text{CHCl}_3$ );  $^1\text{H NMR}$  (400 MHz,  $\text{CDCl}_3$ )  $\delta$  (ppm) 7.87 (d,  $J = 2.2$  Hz, 1H), 7.60 (dd,  $J = 8.5, 2.2$  Hz, 1H), 7.50 (d,  $J = 8.5$  Hz, 1H), 7.40 (d,  $J = 8.1$  Hz, 1H), 7.30 – 7.27 (m, 1H), 7.01 (dd,  $J = 8.2, 1.9$  Hz, 1H), 4.60 (d,  $J = 11.7$  Hz, 1H), 4.11 (d,  $J = 11.7$  Hz, 1H), 3.74 – 3.68 (m, 3H), 3.53 – 3.44 (m, 1H), 3.08 (s, 1H), 3.04 – 2.92 (m, 2H), 2.81 (s, 1H);  $^{13}\text{C NMR}$  (100 MHz,  $\text{CDCl}_3$ )  $\delta$  (ppm) 202.87 (s), 134.7, 133.3, 133.1, 132.8, 131.7, 131.4, 130.9, 130.7, 130.2, 128.9, 128.0, 82.2, 71.1, 65.8, 48.5, 47.9, 45.6, 34.1, 33.5; HRMS (ESI) for  $\text{C}_{20}\text{H}_{16}\text{Cl}_4\text{O}_4\text{S}$   $[\text{M}+\text{Na}]^+$  calcd. 514.9523, found: 514.9418.

CHIRALPAK AD-3 (Hexane/*i*-PrOH) = 70:30, flow rate = 0.2 mL/min, wave length = 206 nm,  $t_R = 65.683$  min (major),  $t_R = 69.096$  min (minor).

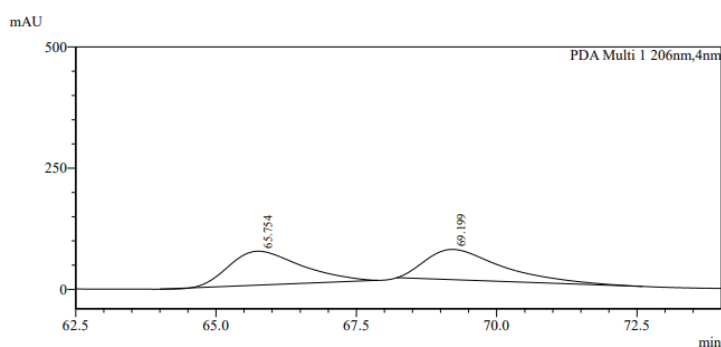

<Peak Table>

| PDA Ch1 206nm |           |         |        |        |
|---------------|-----------|---------|--------|--------|
| Peak#         | Ret. Time | Area    | Height | Aera%  |
| 1             | 65.754    | 6265851 | 70047  | 51.090 |
| 2             | 69.199    | 5998468 | 62277  | 48.910 |

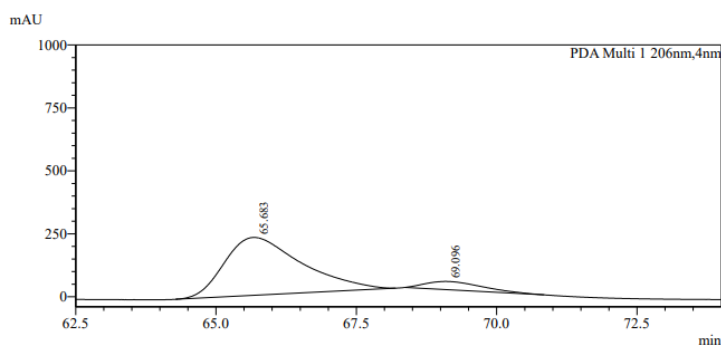

<Peak Table>

| PDA Ch1 206nm |           |          |        |        |
|---------------|-----------|----------|--------|--------|
| Peak#         | Ret. Time | Area     | Height | Aera%  |
| 1             | 65.683    | 21993957 | 229981 | 90.493 |
| 2             | 69.096    | 2310599  | 32293  | 9.507  |



**(R)-1-(3-chlorophenyl)-4-((2-(3,4-dichlorophenyl)-1-hydroxybut-3-yn-2-yl)sulfonyl)butan-2-one (3s)**

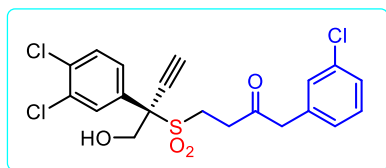

Purification by flash chromatography (*n*-hexane/ethyl acetate = 4/1). yellow solid, 80% yield, 94:6 er.  $[\alpha]_D^{25} = -16.6$  ( $c = 0.8$ ,  $\text{CHCl}_3$ );  $^1\text{H NMR}$  (400 MHz,  $\text{CDCl}_3$ )  $\delta$  (ppm) 7.86 (s, 1H), 7.60 (d,  $J = 6.8$  Hz, 1H), 7.49 (d,  $J = 8.5$  Hz, 1H), 7.26 (s, 2H), 7.18 (s, 1H), 7.06 (d,  $J = 3.1$  Hz, 1H), 4.59 (d,  $J = 11.1$  Hz, 1H), 4.10 (d,  $J = 11.3$  Hz, 1H), 3.75 – 3.65 (m, 3H), 3.53 – 3.40 (m, 1H), 3.07 – 2.86 (m, 4H);  $^{13}\text{C NMR}$  (100 MHz,  $\text{CDCl}_3$ )  $\delta$  (ppm) 203.3, 134.9, 134.7, 133.3, 130.9, 130.7, 130.3, 130.1, 129.6, 128.0, 127.7, 127.7, 82.2, 71.0, 65.8, 49.3, 45.5, 33.4; HRMS (ESI) for  $\text{C}_{20}\text{H}_{17}\text{Cl}_3\text{O}_4\text{S}$   $[\text{M}+\text{Na}]^+$  calcd. 480.9913, found: 480.9803.

CHIRALPAK AD-H (Hexane/*i*-PrOH) = 90:10, flow rate = 0.6 mL/min, wave length = 206 nm,  $t_R = 94.576$  min (major),  $t_R = 101.612$  min (minor).

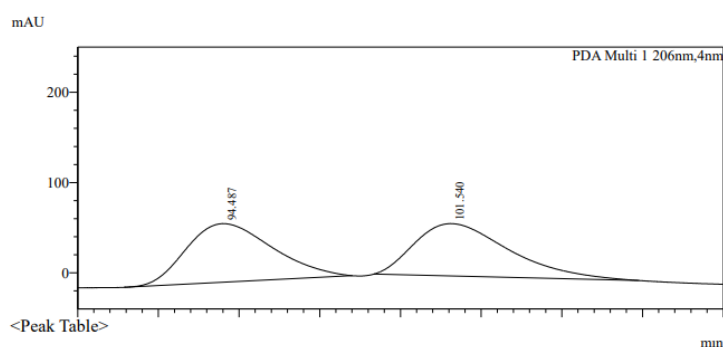

<Peak Table>

| Peak# | Ret. Time | Area     | Height | Aera%  |
|-------|-----------|----------|--------|--------|
| 1     | 94.487    | 12028009 | 64972  | 50.404 |
| 2     | 101.540   | 11835126 | 57979  | 49.596 |

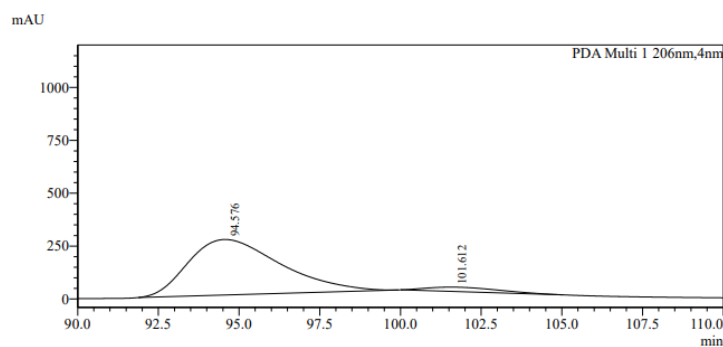

<Peak Table>

| Peak# | Ret. Time | Area     | Height | Aera%  |
|-------|-----------|----------|--------|--------|
| 1     | 94.576    | 52198110 | 262277 | 94.172 |
| 2     | 101.612   | 3230279  | 20351  | 5.828  |

**(R)-4-((2-(3,4-dichlorophenyl)-1-hydroxybut-3-yn-2-yl)sulfonyl)-1-(3-methoxyphenyl)butan-2-one (3t)**

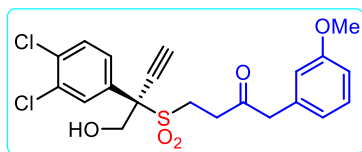

Purification by flash chromatography (*n*-hexane/ethyl acetate = 4/1). yellow solid, 71% yield, 88:12 er.  $[\alpha]_D^{25} = -11.0$  ( $c = 0.46$ ,  $\text{CHCl}_3$ );  $^1\text{H NMR}$  (400 MHz,  $\text{CDCl}_3$ )  $\delta$  (ppm) 7.86 (d,  $J = 2.2$  Hz, 1H), 7.59 (dd,  $J = 8.5, 2.2$  Hz, 1H), 7.49 (d,  $J = 8.5$  Hz, 1H),

7.28 – 7.23 (m, 1H), 6.82 (dd,  $J = 8.3, 2.3$  Hz, 1H), 6.79 – 6.69 (m, 2H), 4.58 (dd,  $J = 11.7, 5.0$  Hz, 1H), 4.09 (dd,  $J = 11.7, 4.4$  Hz, 1H), 3.79 (s, 3H), 3.71 – 3.61 (m, 3H), 3.47 – 3.37 (m, 1H), 3.04 (s, 1H), 3.02 – 2.83 (m, 3H);  $^{13}\text{C NMR}$  (100 MHz,  $\text{CDCl}_3$ )  $\delta$  (ppm) 204.1, 160.0, 134.6, 134.6, 133.2, 130.9, 130.7, 130.4, 130.0, 128.0, 121.7, 115.1, 112.9, 82.1, 76.5, 70.9, 65.7, 55.3, 50.1, 45.5, 33.1; HRMS (ESI) for  $\text{C}_{21}\text{H}_{20}\text{Cl}_2\text{O}_5\text{S}$   $[\text{M}+\text{Na}]^+$  calcd. 477.0408, found: 477.0304.

CHIRALPAK OD-H (Hexane/*i*-PrOH) = 70:30, flow rate = 1.0 mL/min, wave length = 207 nm,  $t_R = 17.328$  min (major),  $t_R = 20.202$  min (minor).

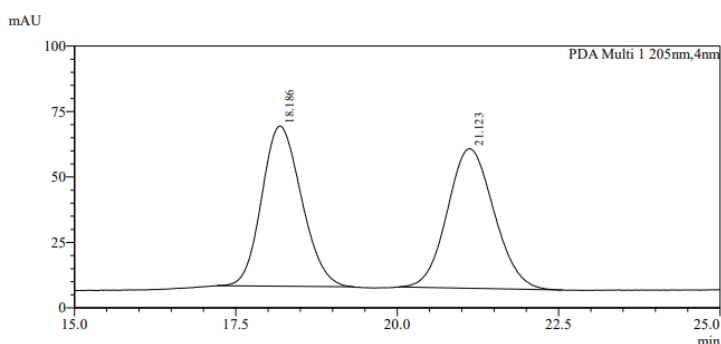

<Peak Table>

| Peak# | Ret. Time | Area    | Height | Aera%  |
|-------|-----------|---------|--------|--------|
| 1     | 18.186    | 2623405 | 61172  | 49.391 |
| 2     | 21.123    | 2688141 | 53332  | 50.609 |

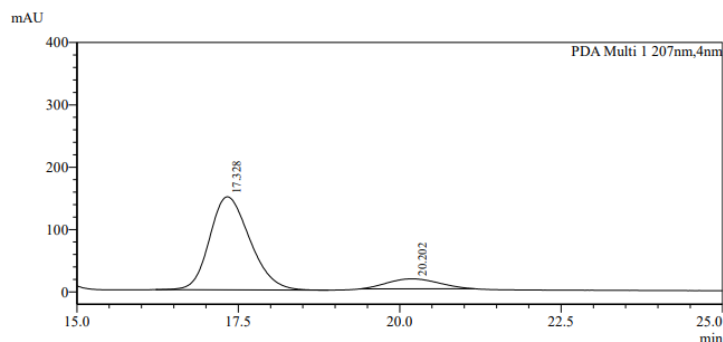

<Peak Table>

| Peak# | Ret. Time | Area    | Height | Aera%  |
|-------|-----------|---------|--------|--------|
| 1     | 17.328    | 6483417 | 149213 | 88.028 |
| 2     | 20.202    | 881734  | 15994  | 11.972 |

**(R)-4-((2-(3,4-dichlorophenyl)-1-hydroxybut-3-yn-2-yl)sulfonyl)-1-(o-tolyl)butan-2-one (3u)**

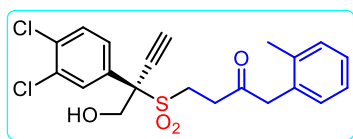

Purification by flash chromatography (*n*-hexane/ethyl acetate = 4/1). yellow solid, 74% yield, 88:12 er.  $[\alpha]_D^{25} = -15.7$  (*c* = 0.33, CHCl<sub>3</sub>); <sup>1</sup>H NMR (400 MHz, CDCl<sub>3</sub>) δ (ppm) 7.86 (s, 1H), 7.59 (d, *J* = 8.5 Hz, 1H), 7.48 (d, *J* = 8.4 Hz, 1H), 7.20 – 7.09 (m, 4H), 4.57 (d, *J* = 11.8 Hz, 1H), 4.08 (d, *J* = 11.8 Hz, 1H), 3.75 (s, 2H), 3.71 – 3.64 (m, 1H), 3.49 – 3.41 (m, 1H), 3.03 (s, 1H), 3.00 – 2.84 (m, 3H), 2.22 (s, 3H); <sup>13</sup>C NMR (100 MHz, CDCl<sub>3</sub>) δ (ppm) 204.2, 136.9, 134.6, 133.2, 132.0, 130.9, 130.7, 130.4, 128.0, 127.8, 126.5, 82.1, 65.8, 48.2, 45.6, 33.2, 19.7; HRMS (ESI) for C<sub>21</sub>H<sub>20</sub>Cl<sub>2</sub>O<sub>4</sub>S [M+Na]<sup>+</sup> calcd. 461.0459, found: 461.0350. CHIRALPAK IF (Hexane/*i*-PrOH) = 70:30, flow rate = 1.0 mL/min, wave length = 206 nm, *t*<sub>R</sub> = 8.704 min (major), *t*<sub>R</sub> = 14.741 min (minor).

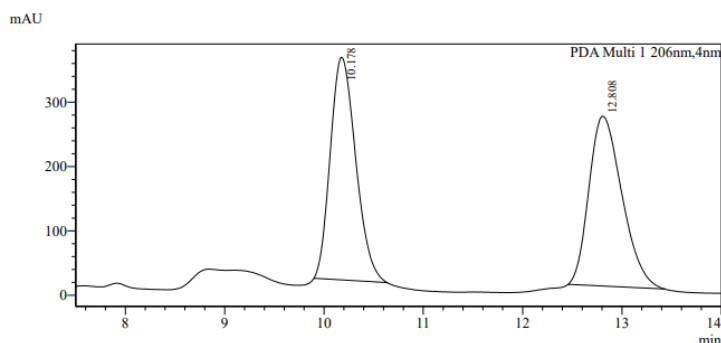

<Peak Table>

| PDA Ch1 206nm |           |         |        |        |
|---------------|-----------|---------|--------|--------|
| Peak#         | Ret. Time | Area    | Height | Aera%  |
| 1             | 10.178    | 6159433 | 345931 | 50.216 |
| 2             | 12.808    | 6106452 | 264016 | 49.784 |

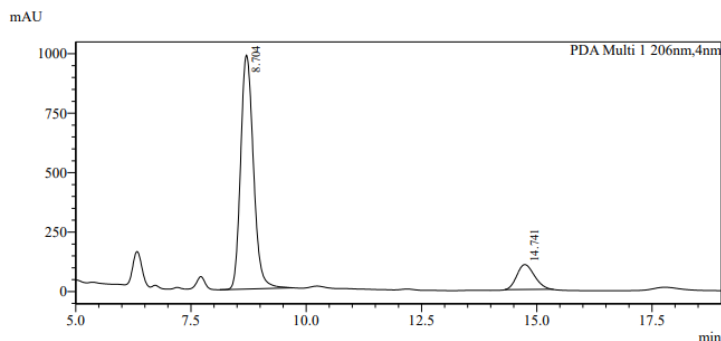

<Peak Table>

| PDA Ch1 206nm |           |          |        |        |
|---------------|-----------|----------|--------|--------|
| Peak#         | Ret. Time | Area     | Height | Aera%  |
| 1             | 8.704     | 19023365 | 983650 | 87.263 |
| 2             | 14.741    | 2776760  | 104874 | 12.737 |

**(R)-4-((2-(3,4-dichlorophenyl)-1-hydroxybut-3-yn-2-yl)sulfonyl)-1-(2-fluorophenyl)butan-2-one (3v)**

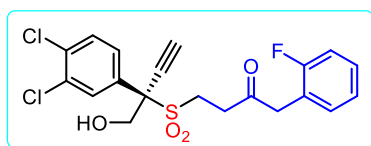

Purification by flash chromatography (*n*-hexane/ethyl acetate = 4/1). yellow solid, 83% yield, 94:6 er.  $[\alpha]_D^{25} = -13.4$  (*c* = 0.1, CHCl<sub>3</sub>); <sup>1</sup>H NMR (400 MHz, CDCl<sub>3</sub>) δ (ppm) 7.86 (d, *J* = 1.5 Hz, 1H), 7.64 – 7.56 (m, 1H), 7.48 (d, *J* = 8.5 Hz, 1H), 7.29 – 7.25 (m, 1H), 7.20 – 7.01 (m, 4H), 4.57 (d, *J* = 11.4 Hz, 1H), 4.08 (d, *J* = 11.6 Hz, 1H), 3.77 (s, 2H), 3.72 – 3.64 (m, 1H), 3.55 – 3.44 (m, 1H), 3.06 – 2.97 (m, 3H); <sup>13</sup>C NMR (100 MHz, CDCl<sub>3</sub>) δ (ppm) 202.9, 160.9 (d, *J* = 245.9 Hz), 134.6, 133.3, 131.7, 131.6, 130.9, 130.7, 130.4, 129.6, 129.5, 128.0, 124.5, 124.5, 120.6 (d, *J* = 16.1 Hz), 115.7, 115.5, 82.1, 76.4, 71.0, 65.8, 45.5, 43.1, 43.1, 33.3; HRMS (ESI) for C<sub>20</sub>H<sub>17</sub>Cl<sub>2</sub>FO<sub>4</sub>S [M+Na]<sup>+</sup> calcd. 465.0209, found: 465.0303.

CHIRALPAK AD-H (Hexane/*i*-PrOH) = 90:10, flow rate = 1.0 mL/min, wave length = 207 nm, *t*<sub>R</sub> = 50.995 min (major), *t*<sub>R</sub> = 55.541 min (minor).

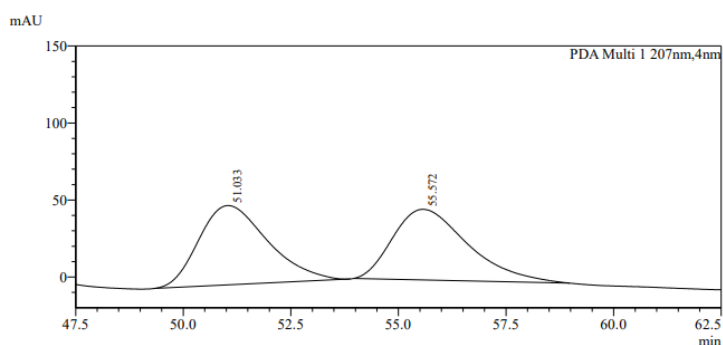

<Peak Table>

| PDA Ch1 207nm |           |         |        |        |
|---------------|-----------|---------|--------|--------|
| Peak#         | Ret. Time | Area    | Height | Aera%  |
| 1             | 51.033    | 5727370 | 51562  | 50.730 |
| 2             | 55.572    | 5562510 | 45844  | 49.270 |

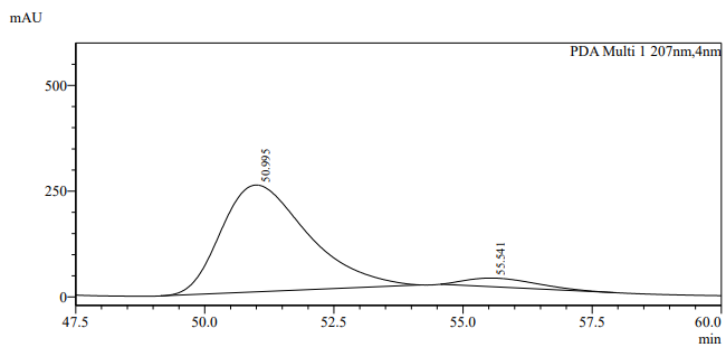

<Peak Table>

| PDA Ch1 207nm |           |          |        |        |
|---------------|-----------|----------|--------|--------|
| Peak#         | Ret. Time | Area     | Height | Aera%  |
| 1             | 50.995    | 29570216 | 252517 | 93.755 |
| 2             | 55.541    | 1969702  | 20216  | 6.245  |

**(R)-3-((2-(3,4-dichlorophenyl)-1-hydroxybut-3-yn-2-yl)sulfonyl)-1-(furan-3-yl)propan-1-one (3w)**

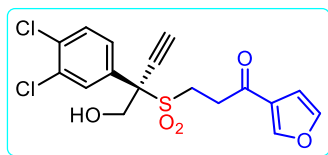

Purification by flash chromatography (*n*-hexane/ethyl acetate = 4/1). yellow solid, 45% yield, 90:10 er.  $[\alpha]_D^{25} = 55.6$  ( $c = 0.15$ ,  $\text{CHCl}_3$ );  $^1\text{H}$

**NMR (400 MHz,  $\text{CDCl}_3$ )**  $\delta$  (ppm) 8.08 (s, 1H), 7.91 (d,  $J = 1.9$  Hz, 1H), 7.64 (dd,  $J = 8.5, 1.9$  Hz, 1H), 7.53 – 7.44 (m, 2H), 6.76 (s, 1H), 4.65 (d,  $J = 11.4$  Hz, 1H), 4.15 (d,  $J = 12.0$  Hz, 1H), 3.91 –

3.81 (m, 1H), 3.66 – 3.53 (m, 1H), 3.38 – 3.19 (m, 2H), 3.11 (s, 1H), 2.88 (s, 1H);  $^{13}\text{C}$  **NMR (100 MHz,  $\text{CDCl}_3$ )**  $\delta$  (ppm) 190.2, 147.8, 144.6, 134.7, 133.3, 131.0, 130.7, 130.4, 128.1, 126.8, 108.4, 82.2, 71.1, 65.8, 45.4, 31.5; HRMS (ESI) for  $\text{C}_{17}\text{H}_{14}\text{Cl}_2\text{O}_5\text{S}$   $[\text{M}+\text{Na}]^+$  calcd. 422.9939, found: 422.9834.

CHIRALPAK AD-H (Hexane/*i*-PrOH) = 90:10, flow rate = 1.0 mL/min, wave length = 207 nm,  $t_R = 89.580$  min (major),  $t_R = 95.094$  min (minor).

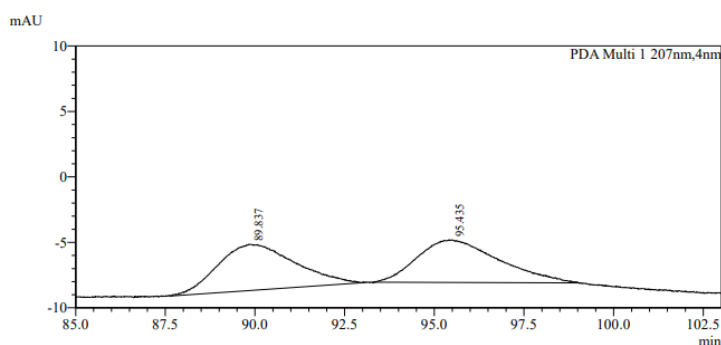

<Peak Table>

| PDA Ch1 207nm |           |        |        |        |
|---------------|-----------|--------|--------|--------|
| Peak#         | Ret. Time | Area   | Height | Aera%  |
| 1             | 89.837    | 523829 | 3539   | 50.460 |
| 2             | 95.435    | 514268 | 3256   | 49.540 |

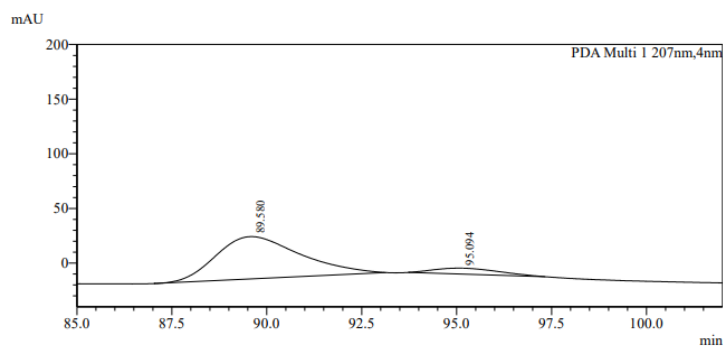

<Peak Table>

| PDA Ch1 207nm |           |         |        |        |
|---------------|-----------|---------|--------|--------|
| Peak#         | Ret. Time | Area    | Height | Aera%  |
| 1             | 89.580    | 5967861 | 38750  | 90.281 |
| 2             | 95.094    | 642448  | 5437   | 9.719  |

**(R)-4-((2-(3,4-dichlorophenyl)-1-hydroxybut-3-yn-2-yl)sulfonyl)-1-(thiophen-2-yl)butan-2-one (3x)**

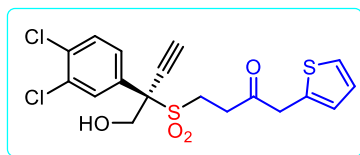

Purification by flash chromatography (*n*-hexane/ethyl acetate = 4/1). white solid, 49% yield, 91.5:8.5 er.  $[\alpha]_D^{25} = -16.1$  (*c* = 0.2,  $\text{CHCl}_3$ );  $^1\text{H NMR}$  (400 MHz,  $\text{CDCl}_3$ )  $\delta$  (ppm) 7.87 (d, *J* = 2.2 Hz, 1H), 7.60 (dd, *J* = 8.5, 2.2 Hz, 1H), 7.50 (d, *J* = 8.5 Hz, 1H), 7.24 (d, *J* = 4.2 Hz, 1H), 7.00 – 6.97 (m, 1H), 6.90 (dd, *J* = 9.7, 3.0 Hz, 1H), 4.60 (dd, *J* = 11.7, 5.3 Hz, 1H), 4.11 (dd, *J* = 11.8, 4.7 Hz, 1H), 3.94 (s, 2H), 3.73 – 3.63 (m, 1H), 3.51 – 3.41 (m, 1H), 3.27 (t, *J* = 7.1 Hz, 1H), 3.05 – 2.95 (m, 2H), 2.81 (s, 1H);  $^{13}\text{C NMR}$  (100 MHz,  $\text{CDCl}_3$ )  $\delta$  (ppm) 202.8, 134.7, 134.0, 133.3, 130.9, 130.7, 130.3, 128.0, 127.4, 127.3, 125.6, 82.1, 71.0, 65.8, 47.8, 45.5, 43.6, 43.5, 33.5, 33.0; HRMS (ESI) for  $\text{C}_{18}\text{H}_{16}\text{Cl}_2\text{O}_4\text{S}_2$   $[\text{M}+\text{Na}]^+$  calcd. 452.9867, found: 452.9760.

CHIRALPAK AY-H (Hexane/*i*-PrOH) = 80:20, flow rate = 1.0 mL/min, wave length = 204 nm,  $t_R$  = 19.428 min (major),  $t_R$  = 27.809 min (minor).

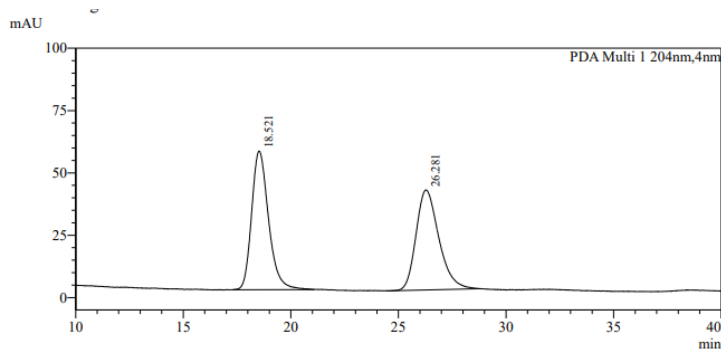

<Peak Table>

| PDA Ch1 204nm |           |         |        |        |
|---------------|-----------|---------|--------|--------|
| Peak#         | Ret. Time | Area    | Height | Aera%  |
| 1             | 18.521    | 3043800 | 55642  | 50.749 |
| 2             | 26.281    | 2953940 | 40096  | 49.251 |

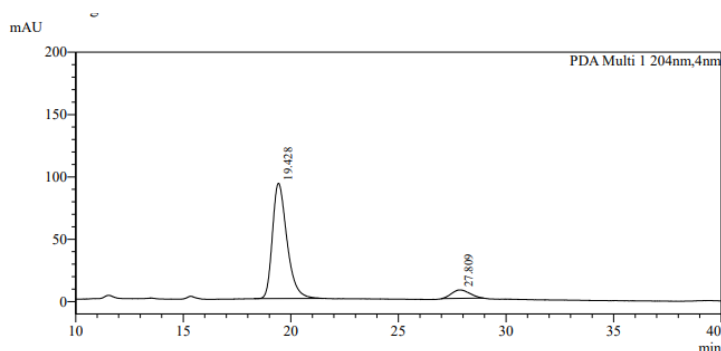

<Peak Table>

| PDA Ch1 204nm |           |         |        |        |
|---------------|-----------|---------|--------|--------|
| Peak#         | Ret. Time | Area    | Height | Aera%  |
| 1             | 19.428    | 4339947 | 92450  | 91.637 |
| 2             | 27.809    | 396070  | 6758   | 8.363  |

**(R)-1-((2-(3,4-dichlorophenyl)-1-hydroxybut-3-yn-2-yl)sulfonyl)-4-methyl-4-phenylpentan-3-one (3y)**

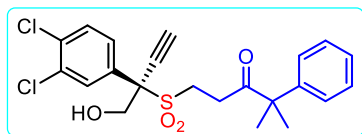

Purification by flash chromatography (*n*-hexane/ethyl acetate = 4/1). colorless oil, 85% yield, 92:8 er.  $[\alpha]_D^{25} = -17.9$  ( $c = 0.6$ ,  $\text{CHCl}_3$ );  $^1\text{H NMR}$  (400 MHz,  $\text{CDCl}_3$ )  $\delta$  (ppm) 7.83 (d,  $J = 2.2$  Hz, 1H), 7.56 (dd,  $J = 8.5, 2.3$  Hz, 1H), 7.46 (d,  $J = 8.5$  Hz, 1H), 7.38 – 7.32 (m, 2H), 7.29 – 7.25 (m, 1H), 7.23 – 7.19 (m, 2H), 4.55 (d,  $J = 11.8$  Hz, 1H), 4.07 (d,  $J = 11.8$  Hz, 1H), 3.60 – 3.47 (m, 1H), 3.42 – 3.31 (m, 1H), 2.99 (s, 1H), 2.93 (s, 1H), 2.82 – 2.70 (m, 1H), 2.69 – 2.59 (m, 1H), 1.49 (d,  $J = 5.1$  Hz, 6H);  $^{13}\text{C NMR}$  (100 MHz,  $\text{CDCl}_3$ )  $\delta$  (ppm) 209.2, 142.9, 134.5, 133.2, 130.9, 130.7, 130.5, 129.0, 128.0, 127.4, 126.0, 82.0, 76.5, 70.8, 65.7, 52.2, 46.1, 29.5, 25.3, 25.2; HRMS (ESI) for  $\text{C}_{22}\text{H}_{22}\text{Cl}_2\text{O}_4\text{S}$   $[\text{M}+\text{Na}]^+$  calcd. 475.0616, found: 475.0514. CHIRALPAK AD-H (Hexane/*i*-PrOH) = 90:10, flow rate = 1.0 mL/min, wave length = 207 nm,  $t_R = 25.604$  min (major),  $t_R = 35.861$  min (minor).

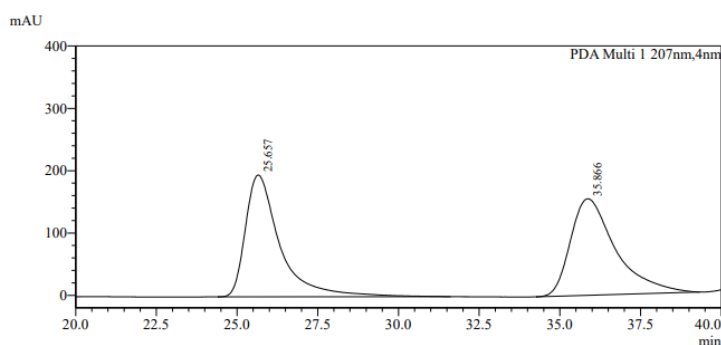

<Peak Table>

| PDA Ch1 207nm |           |          |        |        |
|---------------|-----------|----------|--------|--------|
| Peak#         | Ret. Time | Area     | Height | Aera%  |
| 1             | 25.657    | 14585654 | 195281 | 49.234 |
| 2             | 35.866    | 15039555 | 154861 | 50.766 |

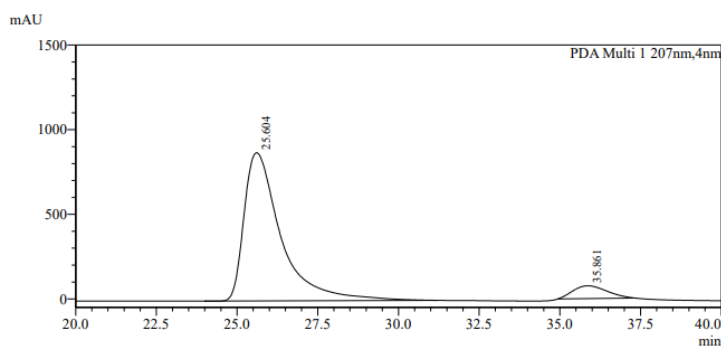

<Peak Table>

| PDA Ch1 207nm |           |          |        |        |
|---------------|-----------|----------|--------|--------|
| Peak#         | Ret. Time | Area     | Height | Aera%  |
| 1             | 25.604    | 69750502 | 875457 | 92.630 |
| 2             | 35.861    | 5549856  | 75630  | 7.370  |

**(R)-4-((2-(3,4-dichlorophenyl)-1-hydroxybut-3-yn-2-yl)sulfonyl)-1,1-diphenylbutan-2-one (3z)**

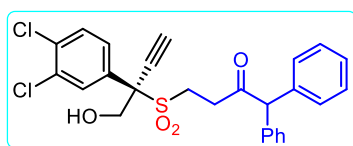

Purification by flash chromatography (*n*-hexane/ethyl acetate = 4/1). colorless oil, 57% yield, 94.5:5.5 er.  $[\alpha]_D^{25} = -12.1$  ( $c = 0.36$ ,  $\text{CHCl}_3$ );  $^1\text{H NMR}$  (400 MHz,  $\text{CDCl}_3$ )  $\delta$  (ppm) 7.85 (d,  $J = 2.3$  Hz, 1H), 7.58 (dd,  $J = 8.5, 2.3$  Hz, 1H), 7.47 (d,  $J = 8.5$  Hz, 1H),

7.35 – 7.27 (m, 6H), 7.21 – 7.17 (m, 4H), 5.13 (s, 1H), 4.56 (dd,  $J = 11.8, 5.6$  Hz, 1H), 4.07 (dd,  $J = 11.8, 5.2$  Hz, 1H), 3.72 – 3.61 (m, 1H), 3.52 – 3.41 (m, 1H), 3.13 – 2.96 (m, 3H), 2.83 (s, 1H);  $^{13}\text{C NMR}$  (100 MHz,  $\text{CDCl}_3$ )  $\delta$  (ppm) 204.7, 137.4, 137.4, 134.6, 133.3, 130.9, 130.7, 130.4, 128.9, 128.0, 82.1, 76.4, 71.0, 65.7, 64.3, 45.8, 34.1; HRMS (ESI) for  $\text{C}_{26}\text{H}_{22}\text{Cl}_2\text{O}_4\text{S}$   $[\text{M}+\text{Na}]^+$  calcd. 523.0616, found: 523.0510.

CHIRALPAK AD-H (Hexane/*i*-PrOH) = 90:10, flow rate = 1.0 mL/min, wave length = 206 nm,  $t_R = 52.914$  min (major),  $t_R = 61.523$  min (minor).

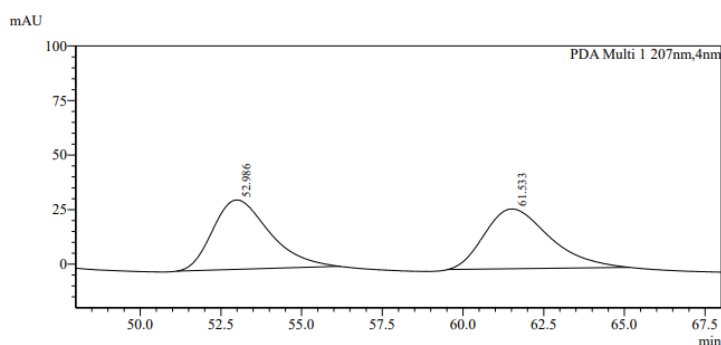

<Peak Table>

| PDA Ch1 207nm |           |         |        |        |
|---------------|-----------|---------|--------|--------|
| Peak#         | Ret. Time | Area    | Height | Aera%  |
| 1             | 52.986    | 3881693 | 31780  | 50.179 |
| 2             | 61.533    | 3853998 | 27413  | 49.821 |

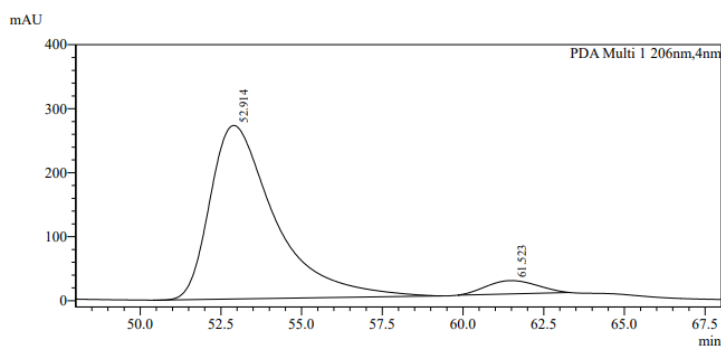

<Peak Table>

| PDA Ch1 206nm |           |          |        |        |
|---------------|-----------|----------|--------|--------|
| Peak#         | Ret. Time | Area     | Height | Aera%  |
| 1             | 52.914    | 38042947 | 271098 | 94.358 |
| 2             | 61.523    | 2274903  | 20736  | 5.642  |



**(R)-6-chloro-1-((2-(3,4-dichlorophenyl)-1-hydroxybut-3-yn-2-yl)sulfonyl)hexan-3-one (3aa)**

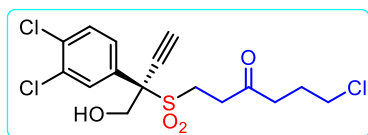

Purification by flash chromatography (*n*-hexane/ethyl acetate = 4/1). yellow solid, 80% yield, 87.5:12.5 er.  $[\alpha]_D^{25} = -17.9$  ( $c = 0.4$ ,  $\text{CHCl}_3$ );  $^1\text{H NMR}$  (400 MHz,  $\text{CDCl}_3$ )  $\delta$  (ppm) 7.88 (d,  $J = 2.0$  Hz, 1H), 7.62 (dd,  $J = 8.5, 2.1$  Hz, 1H), 7.51 (d,  $J = 8.5$  Hz, 1H), 4.61 (d,  $J = 11.9$  Hz, 1H), 4.12 (d,  $J = 11.9$  Hz, 1H), 3.78 – 3.65 (m, 1H), 3.56 (t,  $J = 6.2$  Hz, 2H), 3.53 – 3.44 (m, 1H), 3.11 (s, 1H), 3.07 – 2.89 (m, 3H), 2.69 (t,  $J = 7.0$  Hz, 2H), 2.11 – 2.04 (m, 2H);  $^{13}\text{C NMR}$  (100 MHz,  $\text{CDCl}_3$ )  $\delta$  (ppm) 205.4, 134.7, 133.3, 131.0, 130.7, 130.3, 128.0, 82.1, 76.5, 71.0, 65.8, 45.4, 44.1, 39.5, 33.8, 26.1; HRMS (ESI) for  $\text{C}_{16}\text{H}_{17}\text{Cl}_3\text{O}_4\text{S}$   $[\text{M}+\text{H}]^+$  calcd. 410.9913, found: 410.9987.

CHIRALPAK IG (Hexane/*i*-PrOH) = 70:30, flow rate = 1.0 mL/min, wave length = 207 nm,  $t_R = 20.808$  min (minor),  $t_R = 26.779$  min (major).

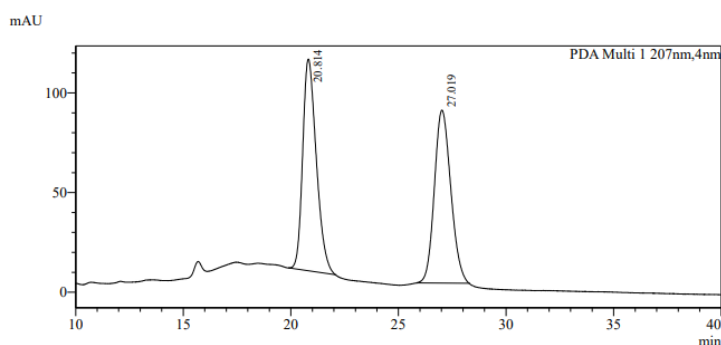

<Peak Table>

| PDA Ch1 207nm |           |         |        |        |
|---------------|-----------|---------|--------|--------|
| Peak#         | Ret. Time | Area    | Height | Aera%  |
| 1             | 20.814    | 4679293 | 106186 | 50.400 |
| 2             | 27.019    | 4605066 | 86705  | 49.600 |

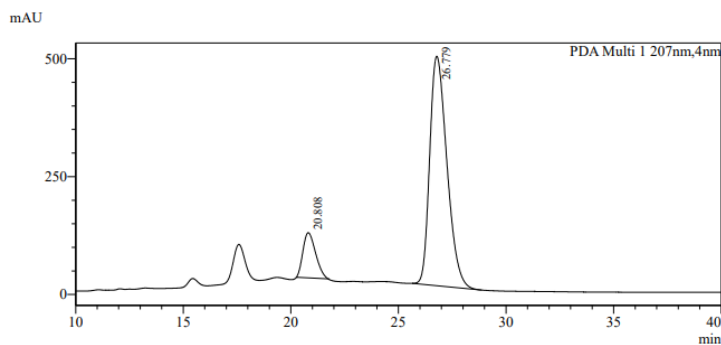

<Peak Table>

| PDA Ch1 207nm |           |          |        |        |
|---------------|-----------|----------|--------|--------|
| Peak#         | Ret. Time | Area     | Height | Aera%  |
| 1             | 20.808    | 3928133  | 95922  | 12.652 |
| 2             | 26.779    | 27120341 | 487037 | 87.348 |

**(R)-1-cyclopropyl-3-((2-(3,4-dichlorophenyl)-1-hydroxybut-3-yn-2-yl)sulfonyl)propan-1-one (3ab)**

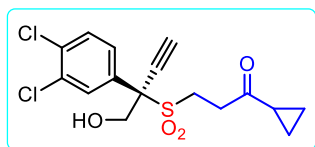

Purification by flash chromatography (*n*-hexane/ethyl acetate = 4/1), yellow solid, 57% yield, 91:9 er.  $[\alpha]_D^{25} = -23.8$  ( $c = 0.5$ ,  $\text{CHCl}_3$ );  $^1\text{H}$

**NMR (400 MHz,  $\text{CDCl}_3$ )**  $\delta$  (ppm) 7.88 (d,  $J = 2.2$  Hz, 1H), 7.62 (dd,  $J = 8.5, 2.3$  Hz, 1H), 7.50 (d,  $J = 8.5$  Hz, 1H), 4.60 (dd,  $J = 11.8, 5.0$

Hz, 1H), 4.11 (dd,  $J = 11.7, 4.7$  Hz, 1H), 3.79 – 3.66 (m, 1H), 3.51 – 3.40 (m, 1H), 3.20 – 3.01 (m, 4H), 2.00 – 1.91 (m, 1H), 1.10 – 1.03 (m, 2H), 0.99 – 0.92 (m, 2H);  $^{13}\text{C}$  **NMR (100 MHz,  $\text{CDCl}_3$ )**  $\delta$  (ppm) 206.6, 134.6, 133.2, 131.0, 130.7, 130.5, 128.1, 82.06, 76.5, 71.0, 65.8, 45.4, 34.2, 20.9, 11.7, 11.6; HRMS (ESI) for  $\text{C}_{16}\text{H}_{16}\text{Cl}_2\text{O}_4\text{S}$   $[\text{M}+\text{Na}]^+$  calcd. 397.0146, found: 397.0042.

CHIRALPAK AD-H (Hexane/*i*-PrOH) = 90:10, flow rate = 0.7 mL/min, wave length = 207 nm,  $t_R = 52.086$  min (minor),  $t_R = 55.765$  min (major).

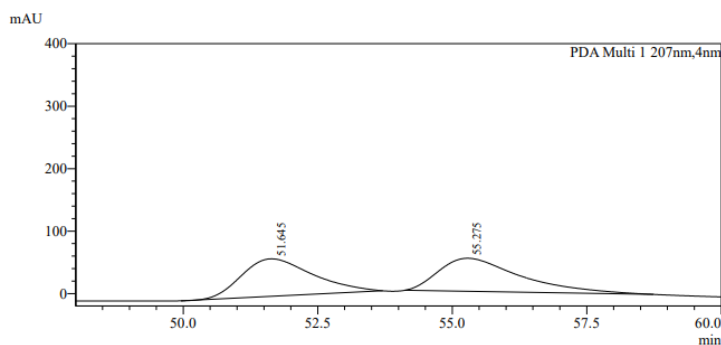

<Peak Table>

| PDA Ch1 207nm |           |         |        |        |
|---------------|-----------|---------|--------|--------|
| Peak#         | Ret. Time | Area    | Height | Aera%  |
| 1             | 51.645    | 5502104 | 59929  | 49.576 |
| 2             | 55.275    | 5596274 | 52819  | 50.424 |

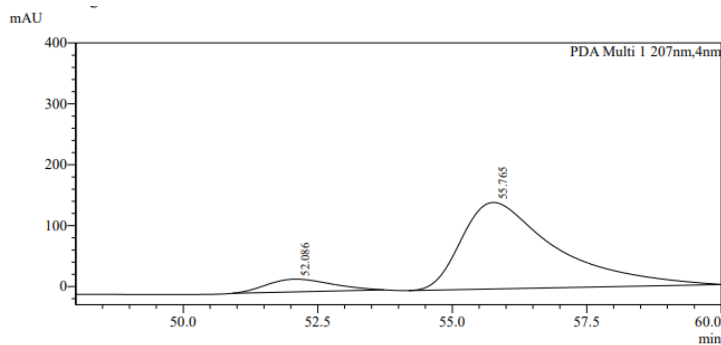

<Peak Table>

| PDA Ch1 207nm |           |          |        |        |
|---------------|-----------|----------|--------|--------|
| Peak#         | Ret. Time | Area     | Height | Aera%  |
| 1             | 52.086    | 1747789  | 20856  | 9.176  |
| 2             | 55.765    | 17299850 | 142000 | 90.824 |

**(R)-1-cyclobutyl-3-((2-(3,4-dichlorophenyl)-1-hydroxybut-3-yn-2-yl)sulfonyl)propan-1-one (3ac)**

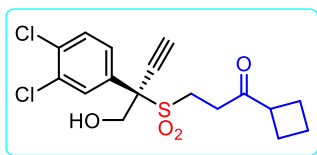

Purification by flash chromatography (*n*-hexane/ethyl acetate = 4/1). yellow solid, 80% yield, 87.5:12.5 er.  $[\alpha]_D^{25} = -5.8$  ( $c = 0.19$ ,  $\text{CHCl}_3$ );

$^1\text{H NMR}$  (400 MHz,  $\text{CDCl}_3$ )  $\delta$  (ppm) 7.89 (d,  $J = 2.1$  Hz, 1H), 7.63 (dd,  $J = 8.5, 2.2$  Hz, 1H), 7.51 (d,  $J = 8.5$  Hz, 1H), 4.62 (dd,  $J = 11.5, 4.3$  Hz, 1H), 4.13 (dd,  $J = 11.6, 4.0$  Hz, 1H), 3.79 – 3.67 (m, 1H),

3.54 – 3.41 (m, 1H), 3.37 – 3.28 (m, 1H), 3.16 – 3.05 (m, 2H), 2.96 – 2.89 (m, 1H), 2.84 – 2.74 (m, 1H), 2.26 – 2.15 (m, 4H), 2.02 – 1.91 (m, 1H), 1.90 – 1.80 (m, 1H);  $^{13}\text{C NMR}$  (100 MHz,  $\text{CDCl}_3$ )  $\delta$  (ppm) 207.5, 134.6, 133.2, 131.0, 130.7, 130.5, 128.1, 82.0, 71.0, 65.8, 45.4, 45.4, 31.0, 24.5, 17.8, 8.6; HRMS (ESI) for  $\text{C}_{17}\text{H}_{18}\text{Cl}_2\text{O}_4\text{S}$   $[\text{M}+\text{H}]^+$  calcd. 389.0303, found: 389.0376.

CHIRALPAK AD-H (Hexane/*i*-PrOH) = 95:5, flow rate = 1.0 mL/min, wave length = 209 nm,  $t_R = 91.699$  min (minor),  $t_R = 97.991$  min (major).

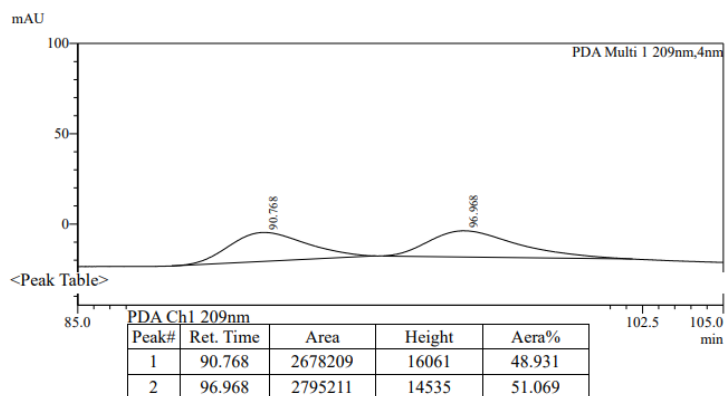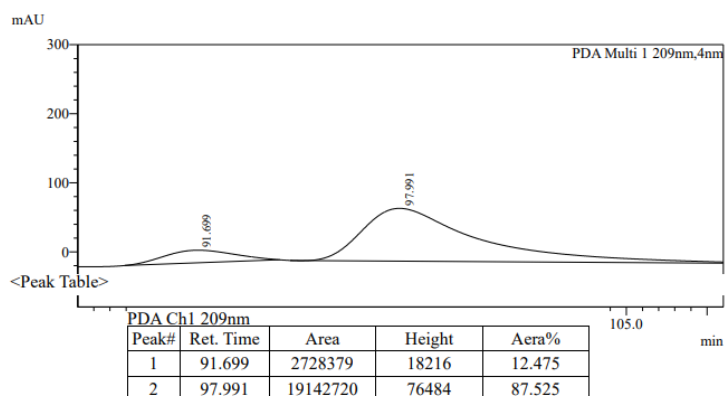

**(R)-1-cyclohexyl-3-((2-(3,4-dichlorophenyl)-1-hydroxybut-3-yn-2-yl)sulfonyl)propan-1-one (3ad)**

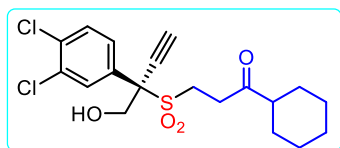

Purification by flash chromatography (*n*-hexane/ethyl acetate = 4/1). yellow solid, 83% yield, 92:8 er.  $[\alpha]_D^{25} = -18.9$  (c = 0.1, CHCl<sub>3</sub>);

<sup>1</sup>H NMR (400 MHz, CDCl<sub>3</sub>) δ (ppm) 7.89 (d, *J* = 2.3 Hz, 1H), 7.63 (dd, *J* = 8.5, 2.3 Hz, 1H), 7.51 (d, *J* = 8.5 Hz, 1H), 4.61 (dd,

*J* = 11.9, 7.1 Hz, 1H), 4.13 (dd, *J* = 11.9, 6.9 Hz, 1H), 3.73 – 3.62 (m, 1H), 3.50 – 3.39 (m, 1H), 3.11 (s, 1H), 3.07 – 2.96 (m, 2H), 2.94 – 2.84 (m, 1H), 2.43 – 2.33 (m, 1H), 1.89 – 1.73 (m, 5H), 1.71 – 1.61 (m, 1H), 1.36 – 1.19 (m, 5H); <sup>13</sup>C NMR (100 MHz, CDCl<sub>3</sub>) δ (ppm) 209.7, 134.6, 133.2, 131.0, 130.7, 130.5, 128.1, 82.1, 76.5, 70.9, 65.8, 50.9, 45.4, 31.6, 28.4, 25.7, 25.5; HRMS (ESI) for C<sub>19</sub>H<sub>22</sub>Cl<sub>2</sub>O<sub>4</sub>S [M+Na]<sup>+</sup> calcd. 439.0616, found: 439.0508.

CHIRALPAK AD-H (Hexane/*i*-PrOH) = 90:10, flow rate = 0.6 mL/min, wave length = 208 nm, *t*<sub>R</sub> = 55.264 min (minor), *t*<sub>R</sub> = 61.270 min (major).

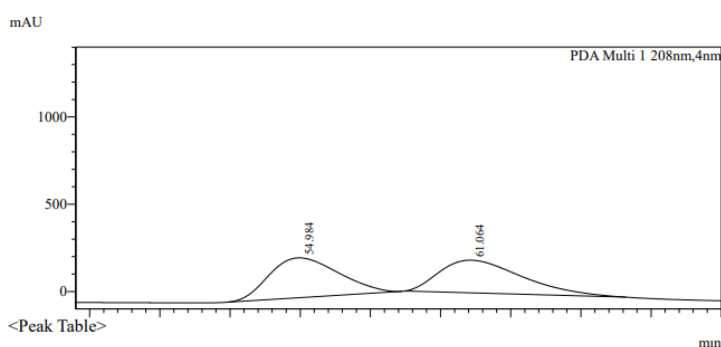

<Peak Table>

| PDA Ch1 208nm |           |          |        |        |
|---------------|-----------|----------|--------|--------|
| Peak#         | Ret. Time | Area     | Height | Aera%  |
| 1             | 54.984    | 39179838 | 227878 | 50.463 |
| 2             | 61.064    | 38461199 | 186932 | 49.537 |

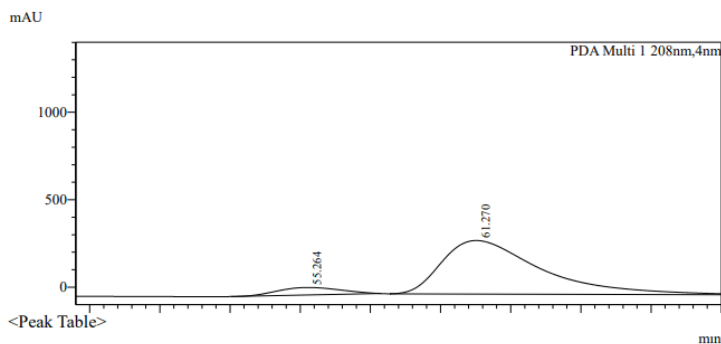

<Peak Table>

| PDA Ch1 208nm |           |          |        |        |
|---------------|-----------|----------|--------|--------|
| Peak#         | Ret. Time | Area     | Height | Aera%  |
| 1             | 55.264    | 6733398  | 43053  | 8.198  |
| 2             | 61.270    | 75401715 | 305986 | 91.802 |

**(R)-3-((2-(3,4-dichlorophenyl)-1-hydroxybut-3-yn-2-yl)sulfonyl)-1-(tetrahydro-2H-pyran-4-yl)propan-1-one (3ae)**

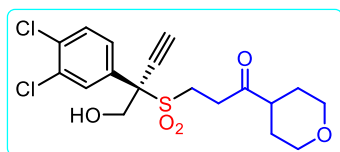

Purification by flash chromatography (*n*-hexane/ethyl acetate = 4/1). yellow solid, 81% yield, 92.5:7.5 er.  $[\alpha]_D^{25} = -20.3$  ( $c = 0.1$ ,  $\text{CHCl}_3$ );  $^1\text{H NMR}$  (400 MHz,  $\text{CDCl}_3$ )  $\delta$  (ppm) 7.89 (d,  $J = 2.3$  Hz, 1H), 7.62 (dd,  $J = 8.5, 2.3$  Hz, 1H), 7.51 (d,  $J = 8.5$  Hz, 1H), 4.62 (d,  $J = 11.2$  Hz, 1H), 4.13 (d,  $J = 12.0$  Hz, 1H), 4.02 – 3.97 (m, 2H), 3.76 – 3.67 (m, 1H), 3.49 – 3.37 (m, 3H), 3.10 (s, 1H), 3.08 – 2.97 (m, 1H), 2.95 – 2.87 (m, 1H), 2.83 (s, 1H), 2.66 – 2.55 (m, 1H), 1.82 – 1.68 (m, 4H);  $^{13}\text{C NMR}$  (100 MHz,  $\text{CDCl}_3$ )  $\delta$  (ppm) 207.6, 134.7, 133.3, 131.0, 130.7, 130.3, 128.0, 82.1, 76.5, 71.0, 67.1, 65.8, 47.6, 45.4, 31.5, 28.0; HRMS (ESI) for  $\text{C}_{18}\text{H}_{20}\text{Cl}_2\text{O}_5\text{S}$   $[\text{M}+\text{Na}]^+$  calcd. 441.0408, found: 441.0305.

CHIRALPAK AD-H (Hexane/*i*-PrOH) = 80:20, flow rate = 1.0 mL/min, wave length = 206 nm,  $t_R = 30.745$  min (major),  $t_R = 33.818$  min (minor).

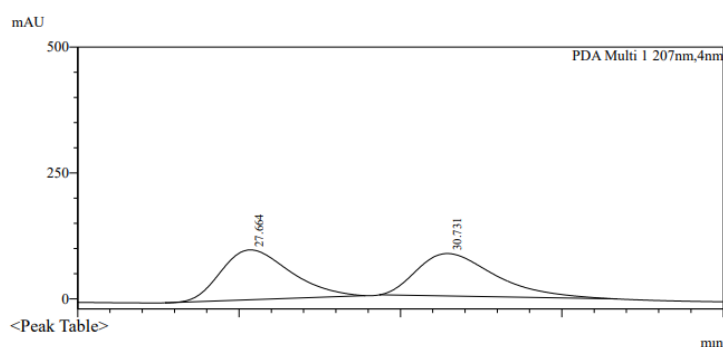

| Peak# | Ret. Time | Area    | Height | Aera%  |
|-------|-----------|---------|--------|--------|
| 1     | 27.664    | 7395817 | 99114  | 50.876 |
| 2     | 30.731    | 7141084 | 84407  | 49.124 |

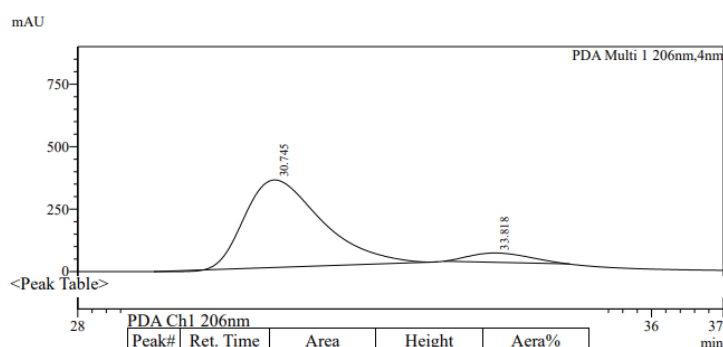

| Peak# | Ret. Time | Area     | Height | Aera%  |
|-------|-----------|----------|--------|--------|
| 1     | 30.745    | 26130146 | 350121 | 92.280 |
| 2     | 33.818    | 2185894  | 37292  | 7.720  |

**(R)-3-((2-(3,4-dichlorophenyl)-1-hydroxybut-3-yn-2-yl)sulfonyl)-1-phenylpropan-1-one (3af)**

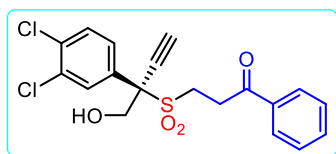

Purification by flash chromatography (*n*-hexane/ethyl acetate = 4/1). white solid, 76% yield, 91:9 er.  $[\alpha]_D^{25} = -11.9$  ( $c = 0.1$ ,  $\text{CHCl}_3$ );

$^1\text{H NMR}$  (400 MHz,  $\text{CDCl}_3$ )  $\delta$  (ppm) 7.97 – 7.91 (m, 3H), 7.66 (dd,  $J = 8.5, 2.3$  Hz, 1H), 7.63 – 7.58 (m, 1H), 7.54 – 7.45 (m, 3H), 4.66 (dd,  $J = 11.9, 7.1$  Hz, 1H), 4.17 (dd,  $J = 11.9, 7.0$  Hz, 1H),

3.92 – 3.83 (m, 1H), 3.69 – 3.51 (m, 2H), 3.50 – 3.39 (m, 1H), 3.12 (s, 1H), 2.87 (t,  $J = 7.2$  Hz, 1H);  $^{13}\text{C NMR}$  (100 MHz,  $\text{CDCl}_3$ )  $\delta$  (ppm) 195.6, 135.7, 134.7, 134.0, 133.3, 131.0, 130.7, 130.5, 128.9, 128.2, 128.1, 82.2, 71.0, 65.8, 45.8, 30.2; HRMS (ESI) for  $\text{C}_{19}\text{H}_{16}\text{Cl}_2\text{O}_4\text{S}$   $[\text{M}+\text{Na}]^+$  calcd. 433.0146, found: 433.0041.

CHIRALPAK AD-H (Hexane/*i*-PrOH) = 70:30, flow rate = 1.0 mL/min, wave length = 206 nm,  $t_R = 13.341$  min (major),  $t_R = 15.795$  min (minor).

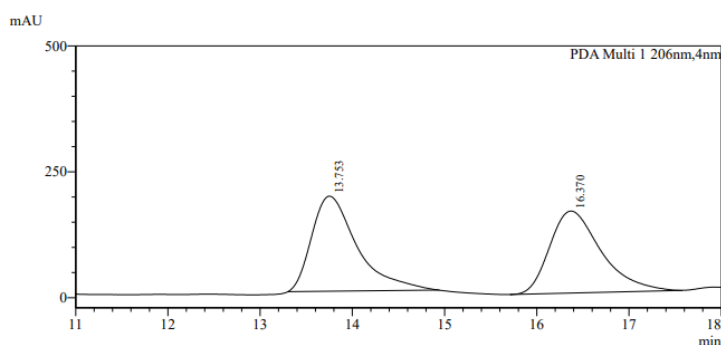

<Peak Table>

| PDA Ch1 206nm |           |         |        |        |
|---------------|-----------|---------|--------|--------|
| Peak#         | Ret. Time | Area    | Height | Aera%  |
| 1             | 13.753    | 6469316 | 188741 | 50.596 |
| 2             | 16.370    | 6316882 | 162917 | 49.404 |

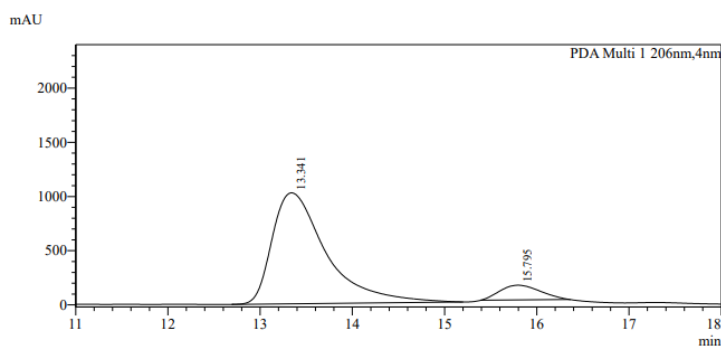

<Peak Table>

| PDA Ch1 206nm |           |          |         |        |
|---------------|-----------|----------|---------|--------|
| Peak#         | Ret. Time | Area     | Height  | Aera%  |
| 1             | 13.341    | 41682519 | 1023535 | 90.977 |
| 2             | 15.795    | 4134150  | 135618  | 9.023  |

**(R)-3-((2-(3,4-dichlorophenyl)-1-hydroxybut-3-yn-2-yl)sulfonyl)-1-(4-methoxyphenyl)propan-1-one (3ag)**

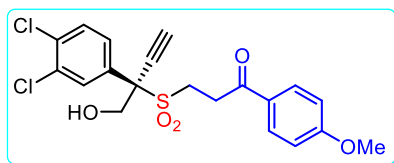

Purification by flash chromatography (*n*-hexane/ethyl acetate = 4/1). white solid, 85% yield, 93:7 er.  $[\alpha]_D^{25} = -14.3$  ( $c = 0.1$ ,  $\text{CHCl}_3$ );  $^1\text{H NMR}$  (400 MHz,  $\text{CDCl}_3$ )  $\delta$  (ppm) 7.98 – 7.89 (m, 3H), 7.66 (d,  $J = 7.7$  Hz, 1H), 7.51 (d,  $J = 8.4$  Hz, 1H), 6.94 (d,  $J = 8.5$  Hz, 2H), 4.66 (dd,  $J = 11.6, 6.8$  Hz, 1H), 4.16 (dd,  $J = 11.6, 6.9$  Hz, 1H), 3.90 – 3.84 (m, 4H), 3.62 – 3.49 (m, 2H), 3.45 – 3.32 (m, 1H), 3.11 (s, 1H), 2.96 (s, 1H);  $^{13}\text{C NMR}$  (100 MHz,  $\text{CDCl}_3$ )  $\delta$  (ppm) 194.1, 164.1, 134.6, 133.3, 131.0, 130.7, 130.5, 128.8, 128.1, 114.0, 82.1, 71.0, 65.8, 55.6, 45.9, 29.7; HRMS (ESI) for  $\text{C}_{20}\text{H}_{18}\text{Cl}_2\text{O}_5\text{S}$   $[\text{M}+\text{Na}]^+$  calcd. 463.0252, found: 463.0141.

CHIRALPAK AD-H (Hexane/*i*-PrOH) = 70:30, flow rate = 1.0 mL/min, wave length = 207 nm,  $t_R = 22.053$  min (major),  $t_R = 27.980$  min (minor).

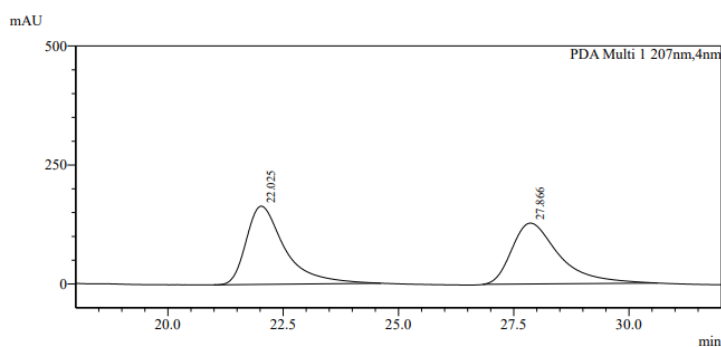

<Peak Table>

| PDA Ch1 207nm |           |         |        |        |
|---------------|-----------|---------|--------|--------|
| Peak#         | Ret. Time | Area    | Height | Aera%  |
| 1             | 22.025    | 9598665 | 164475 | 51.213 |
| 2             | 27.866    | 9143937 | 127998 | 48.787 |

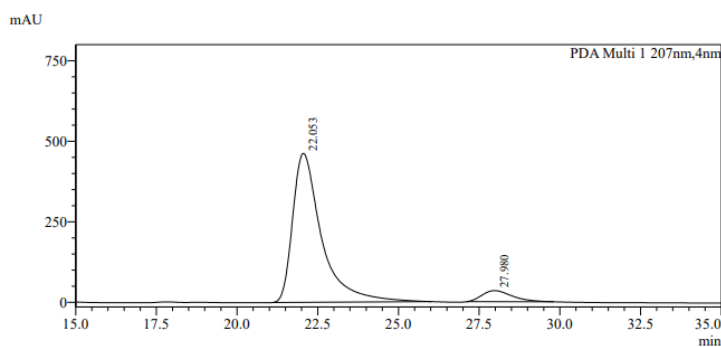

<Peak Table>

| PDA Ch1 207nm |           |          |        |        |
|---------------|-----------|----------|--------|--------|
| Peak#         | Ret. Time | Area     | Height | Aera%  |
| 1             | 22.053    | 28863250 | 462634 | 92.800 |
| 2             | 27.980    | 2239522  | 34484  | 7.200  |

**(R)-3-((2-(3,4-dichlorophenyl)-1-hydroxybut-3-yn-2-yl)sulfonyl)-1-(4-fluorophenyl)propan-1-one (3ah)**

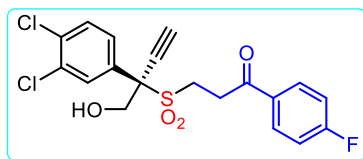

Purification by flash chromatography (*n*-hexane/ethyl acetate = 4/1). white solid, 66% yield, 93:7 er.  $[\alpha]_D^{25} = -12.5$  ( $c = 0.1$ ,  $\text{CHCl}_3$ );  $^1\text{H NMR}$  (400 MHz,  $\text{CDCl}_3$ )  $\delta$  (ppm) 8.01 – 7.94 (m, 2H), 7.91 (d,  $J = 2.2$  Hz, 1H), 7.65 (dd,  $J = 8.5, 2.3$  Hz, 1H), 7.51 (d,  $J = 8.5$  Hz, 1H), 7.15 (t,  $J = 8.6$  Hz, 2H), 4.65 (d,  $J = 11.9$  Hz, 1H), 4.16 (d,  $J = 11.9$  Hz, 1H), 3.87 (ddd,  $J = 13.8, 9.6, 5.5$  Hz, 1H), 3.68 – 3.60 (m, 1H), 3.56 – 3.48 (m, 1H), 3.47 – 3.36 (m, 1H), 3.13 (s, 1H), 2.95 (s, 1H);  $^{13}\text{C NMR}$  (100 MHz,  $\text{CDCl}_3$ )  $\delta$  (ppm) 194.1, 166.2 (d,  $J = 255$  Hz), 134.7, 133.3, 132.2 (d,  $J = 2$  Hz), 131.0, 130.9, 130.8, 130.7, 130.4, 128.1, 116.2, 116.0, 82.2, 76.5, 71.1, 65.8, 45.8, 30.2; HRMS (ESI) for  $\text{C}_{19}\text{H}_{15}\text{Cl}_2\text{FO}_4\text{S}$   $[\text{M}+\text{H}]^+$  calcd. 429.0052, found: 429.0126.

CHIRALPAK AD-H (Hexane/*i*-PrOH) = 70:30, flow rate = 1.0 mL/min, wave length = 207 nm,  $t_R = 17.772$  min (major),  $t_R = 20.581$  min (minor).

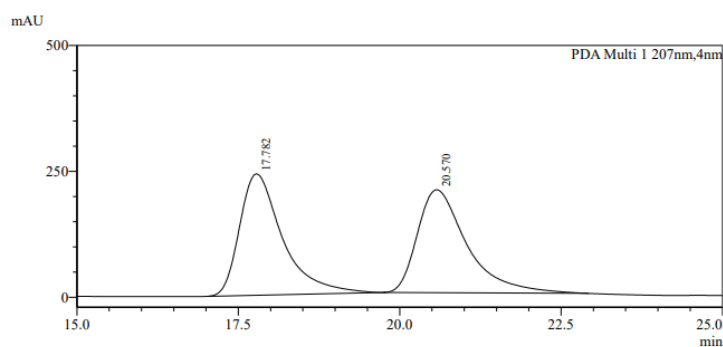

<Peak Table>

| PDA Ch1 207nm |           |          |        |        |
|---------------|-----------|----------|--------|--------|
| Peak#         | Ret. Time | Area     | Height | Aera%  |
| 1             | 17.782    | 11157426 | 241000 | 50.531 |
| 2             | 20.570    | 10923071 | 204338 | 49.469 |

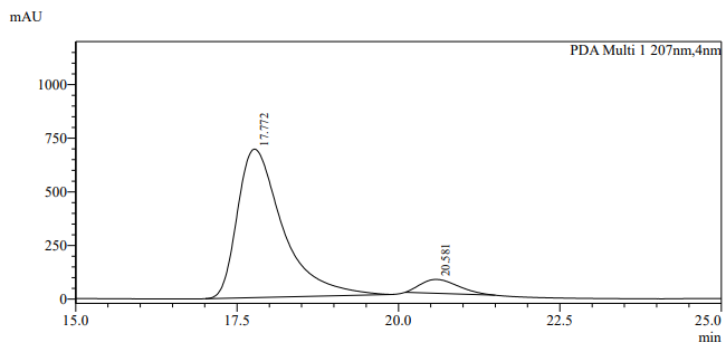

<Peak Table>

| PDA Ch1 207nm |           |          |        |        |
|---------------|-----------|----------|--------|--------|
| Peak#         | Ret. Time | Area     | Height | Aera%  |
| 1             | 17.772    | 33905827 | 691616 | 92.837 |
| 2             | 20.581    | 2616213  | 64275  | 7.163  |



**(R)-1-cyclohexyl-3-((1-hydroxy-2-(naphthalen-2-yl)but-3-yn-2-yl)sulfonyl)propan-1-one (3ai)**

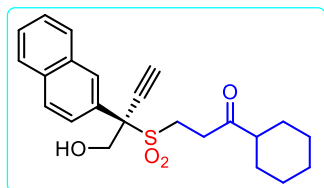

Purification by flash chromatography (*n*-hexane/ethyl acetate = 4/1). white solid, 96% yield, 93:7 er.  $[\alpha]_D^{25} = -10.6$  ( $c = 0.47$ ,  $\text{CHCl}_3$ );  $^1\text{H}$  NMR (400 MHz,  $\text{CDCl}_3$ )  $\delta$  (ppm) 8.30 (s, 1H), 7.93 – 7.81 (m, 4H), 7.57 – 7.48 (m, 2H), 4.81 (d,  $J = 11.8$  Hz, 1H), 4.26 (d,  $J = 11.8$  Hz, 1H), 3.70 – 3.58 (m, 1H), 3.40 – 3.29 (m, 1H), 3.13 (s, 1H), 3.01 – 2.84 (m, 2H), 2.79 – 2.67 (m, 1H), 2.31 – 2.20 (m, 1H), 1.80 – 1.56 (m, 6H), 1.23 – 1.16 (m, 4H);  $^{13}\text{C}$  NMR (100 MHz,  $\text{CDCl}_3$ )  $\delta$  (ppm) 209.7, 133.6, 132.9, 129.3, 128.7, 128.7, 127.7, 127.6, 127.4, 126.8, 125.1, 81.6, 72.0, 65.6, 50.8, 45.0, 31.7, 28.3, 25.7, 25.5; HRMS (ESI) for  $\text{C}_{23}\text{H}_{26}\text{O}_4\text{S}$   $[\text{M}+\text{Na}]^+$  calcd. 421.1552, found: 421.1449.

CHIRALPAK IG (Hexane/*i*-PrOH) = 80:20, flow rate = 1.0 mL/min, wave length = 229 nm,  $t_R = 42.322$  min (major),  $t_R = 59.678$  min (minor).

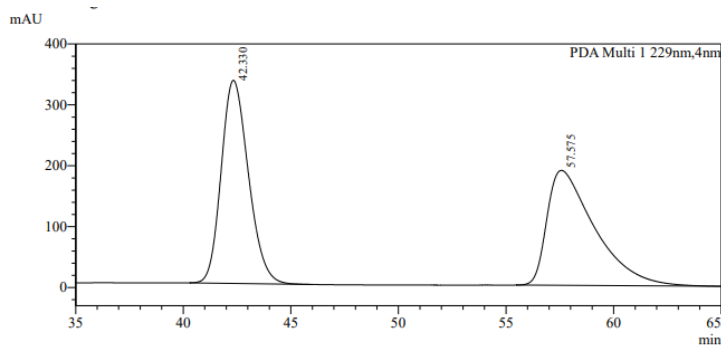

<Peak Table>

| PDA Ch1 229nm |           |          |        |        |
|---------------|-----------|----------|--------|--------|
| Peak#         | Ret. Time | Area     | Height | Aera%  |
| 1             | 42.330    | 29390556 | 333487 | 50.216 |
| 2             | 57.575    | 29137429 | 188843 | 49.784 |

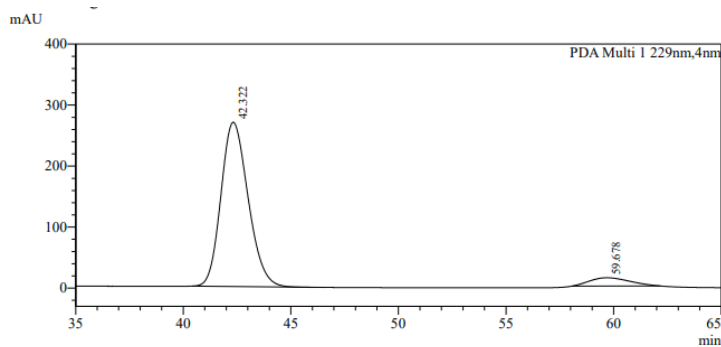

<Peak Table>

| PDA Ch1 229nm |           |          |        |        |
|---------------|-----------|----------|--------|--------|
| Peak#         | Ret. Time | Area     | Height | Aera%  |
| 1             | 42.322    | 23649971 | 269226 | 93.142 |
| 2             | 59.678    | 1741423  | 13520  | 6.858  |

(S)-3-((1-(1-benzyl-1H-1,2,3-triazol-4-yl)-1-(3,4-dichlorophenyl)-2-hydroxyethyl)sulfonyl)-1-(naphthalen-2-yl)propan-1-one (3I-I)

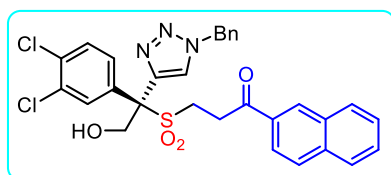

Purification by flash chromatography (*n*-hexane/ethyl acetate = 4/1). yellow solid, 65% yield, 85:15 er.  $[\alpha]_D^{25} = 13.9$  ( $c = 0.2$ ,  $\text{CHCl}_3$ );  $^1\text{H NMR}$  (400 MHz,  $\text{CDCl}_3$ )  $\delta$  (ppm) 8.43 (s, 1H), 8.00 – 7.93 (m, 3H), 7.90 – 7.85 (m, 2H), 7.64 – 7.55 (m, 2H), 7.45 (s, 1H), 7.41 – 7.29 (m, 7H), 5.66 (q,  $J = 14.8$  Hz, 2H),

4.85 – 4.75 (m, 1H), 4.71 – 4.62 (m, 1H), 3.89 (t,  $J = 7.0$  Hz, 1H), 3.75 – 3.64 (m, 1H), 3.63 – 3.50 (m, 2H), 3.39 – 3.28 (m, 1H);  $^{13}\text{C NMR}$  (100 MHz,  $\text{CDCl}_3$ )  $\delta$  (ppm) 195.5, 142.4, 135.8, 134.0, 133.9, 133.2, 133.0, 132.9, 132.4, 131.3, 130.6, 130.1, 129.7, 129.4, 129.2, 128.9, 128.7, 128.4, 128.0, 127.8, 127.0, 126.2, 123.5, 73.2, 66.0, 54.8, 47.8, 29.9. HRMS (ESI) for  $\text{C}_{30}\text{H}_{25}\text{Cl}_2\text{N}_3\text{O}_4\text{S}$   $[\text{M}+\text{Na}]^+$  calcd. 616.0943, found: 616.0833.

CHIRALPAK OZ-H (Hexane/*i*-PrOH) = 70:30, flow rate = 1.0 mL/min, wave length = 247 nm,  $t_R = 32.100$  min (major),  $t_R = 48.289$  min (minor).

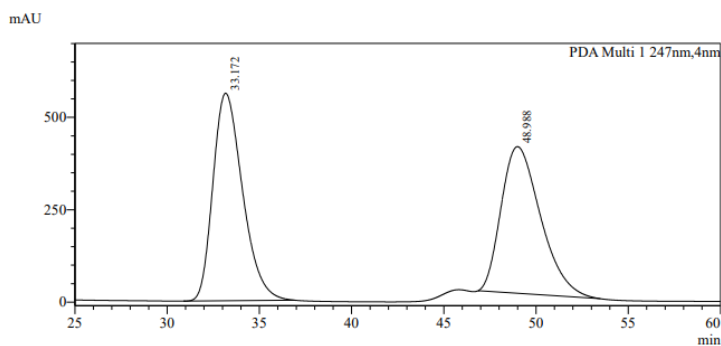

<Peak Table>

| PDA Ch1 247nm |           |          |        |        |
|---------------|-----------|----------|--------|--------|
| Peak#         | Ret. Time | Area     | Height | Aera%  |
| 1             | 33.172    | 62679855 | 561650 | 51.474 |
| 2             | 48.988    | 59089972 | 396709 | 48.526 |

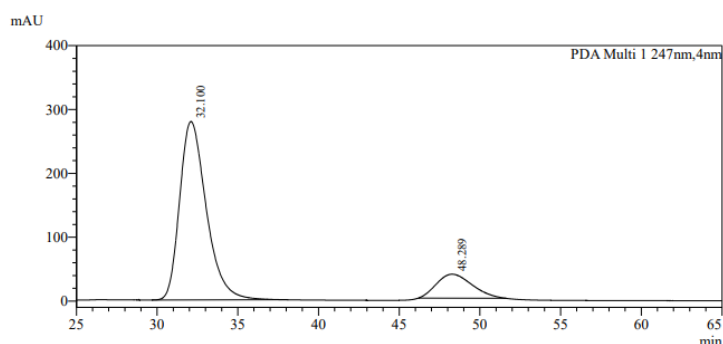

<Peak Table>

| PDA Ch1 247nm |           |          |        |        |
|---------------|-----------|----------|--------|--------|
| Peak#         | Ret. Time | Area     | Height | Aera%  |
| 1             | 32.100    | 32138365 | 279445 | 84.836 |
| 2             | 48.289    | 5744542  | 37433  | 15.164 |

*(S)*-3-((4-bromo-2-(3,4-dichlorophenyl)-1-hydroxybut-3-yn-2-yl)sulfonyl)-1-(naphthalen-2-yl)propan-1-one (*3I-II*)

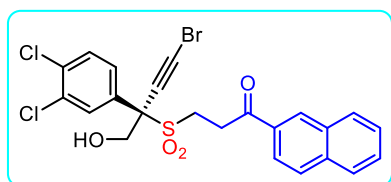

Purification by flash chromatography (*n*-hexane/ethyl acetate = 4/1). white solid, 76% yield, 92:8 er.  $[\alpha]_D^{25} = 12.9$  ( $c = 0.15$ ,  $\text{CHCl}_3$ );  $^1\text{H NMR}$  (400 MHz,  $\text{CDCl}_3$ )  $\delta$  (ppm) 8.45 (s, 1H), 8.00 – 7.93 (m, 2H), 7.88 (t,  $J = 8.0$  Hz, 3H), 7.66 – 7.54 (m, 3H), 7.51 (d,  $J = 8.5$  Hz, 1H), 4.66 (d,  $J = 11.8$  Hz, 1H), 4.18 (d,  $J = 11.8$  Hz, 1H), 3.94 – 3.84 (m, 1H), 3.77 – 3.57 (m, 3H), 3.09 (s, 1H);  $^{13}\text{C NMR}$  (100 MHz,  $\text{CDCl}_3$ )  $\delta$  (ppm) 195.6, 135.9, 134.7, 133.3, 133.0, 132.4, 130.9, 130.8, 130.7, 130.2, 129.7, 129.0, 128.8, 128.1, 127.8, 127.1, 123.5, 73.0, 72.1, 65.9, 54.5, 46.3, 30.5. HRMS (ESI) for  $\text{C}_{23}\text{H}_{17}\text{BrCl}_2\text{O}_4\text{S}$   $[\text{M}+\text{Na}]^+$  calcd. 560.9408, found: 560.9312.

CHIRALPAK OD-H (Hexane/*i*-PrOH) = 80:20, flow rate = 1.0 mL/min, wave length = 247 nm,  $t_R = 20.895$  min (major),  $t_R = 28.702$  min (minor).

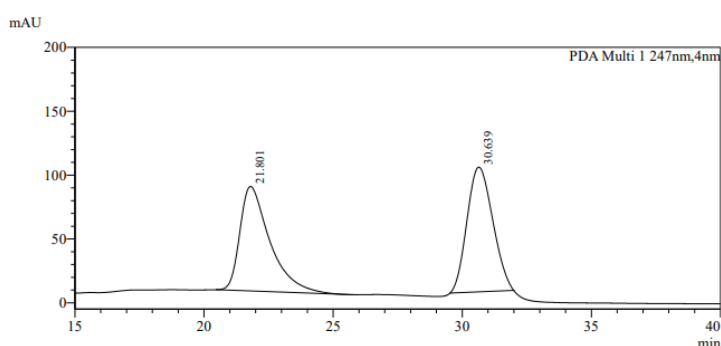

<Peak Table>

| PDA Ch1 247nm |           |         |        |        |
|---------------|-----------|---------|--------|--------|
| Peak#         | Ret. Time | Area    | Height | Aera%  |
| 1             | 21.801    | 6627468 | 81849  | 49.464 |
| 2             | 30.639    | 6771185 | 97621  | 50.536 |

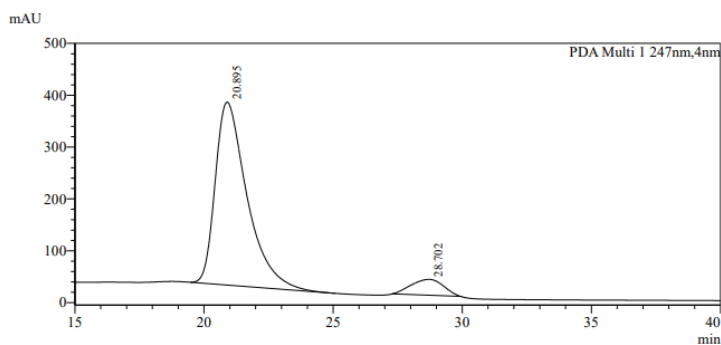

<Peak Table>

| PDA Ch1 247nm |           |          |        |        |
|---------------|-----------|----------|--------|--------|
| Peak#         | Ret. Time | Area     | Height | Aera%  |
| 1             | 20.895    | 30207830 | 352709 | 91.923 |
| 2             | 28.702    | 2654348  | 30615  | 8.077  |

## 6. Crystal data and structural refinement for 3ai

The crystal structure of compound **3ai** has been deposited at the Cambridge Crystallographic Data Centre (CCDC 2368900).

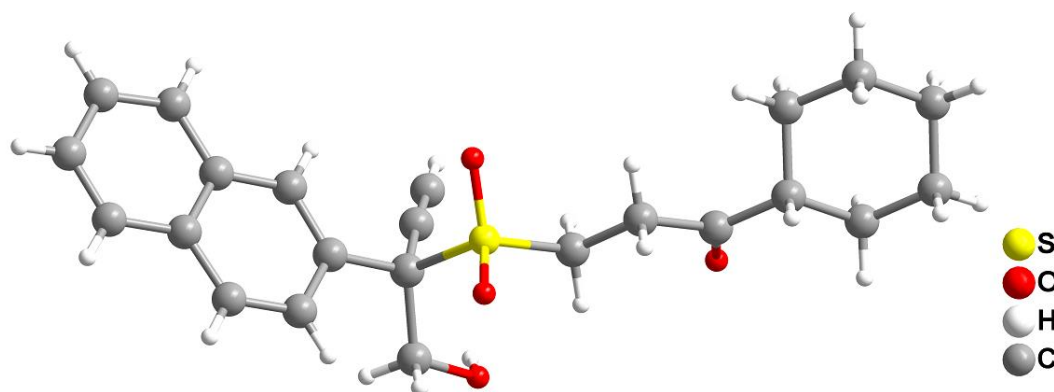

**Table 1** Crystal data and structure refinement for **3ai**.

|                                    |                                                  |
|------------------------------------|--------------------------------------------------|
| Identification code                | 3ai                                              |
| Empirical formula                  | C <sub>23</sub> H <sub>26</sub> O <sub>4</sub> S |
| Formula weight                     | 398.50                                           |
| Temperature/K                      | 273.15                                           |
| Crystal system                     | monoclinic                                       |
| Space group                        | P2 <sub>1</sub>                                  |
| a/Å                                | 11.2877(3)                                       |
| b/Å                                | 6.0439(2)                                        |
| c/Å                                | 15.4637(5)                                       |
| α/°                                | 90                                               |
| β/°                                | 105.7840(10)                                     |
| γ/°                                | 90                                               |
| Volume/Å <sup>3</sup>              | 1015.18(5)                                       |
| Z                                  | 2                                                |
| ρ <sub>calc</sub> /cm <sup>3</sup> | 1.304                                            |
| μ/mm <sup>-1</sup>                 | 1.629                                            |
| F(000)                             | 424.0                                            |
| Crystal size/mm <sup>3</sup>       | 0.25 × 0.23 × 0.22                               |
| Radiation                          | CuKα (λ = 1.54178)                               |
| 2θ range for data collection/°     | 8.14 to 136.464                                  |

|                                             |                                                               |
|---------------------------------------------|---------------------------------------------------------------|
| Index ranges                                | -13 ≤ h ≤ 13, -6 ≤ k ≤ 7, -18 ≤ l ≤ 18                        |
| Reflections collected                       | 12360                                                         |
| Independent reflections                     | 3428 [R <sub>int</sub> = 0.0435, R <sub>sigma</sub> = 0.0465] |
| Data/restraints/parameters                  | 3428/1/254                                                    |
| Goodness-of-fit on F <sup>2</sup>           | 1.085                                                         |
| Final R indexes [I ≥ 2σ (I)]                | R <sub>1</sub> = 0.0412, wR <sub>2</sub> = 0.1056             |
| Final R indexes [all data]                  | R <sub>1</sub> = 0.0419, wR <sub>2</sub> = 0.1063             |
| Largest diff. peak/hole / e Å <sup>-3</sup> | 0.27/-0.43                                                    |
| Flack parameter                             | 0.207(11)                                                     |

**Table 2** Fractional Atomic Coordinates (×104) and Equivalent Isotropic Displacement Parameters (Å<sup>2</sup>×103) for **3ai**. U<sub>eq</sub> is defined as 1/3 of the trace of the orthogonalised U<sub>ij</sub> tensor.

| Atom | x         | y          | z          | U(eq)    |
|------|-----------|------------|------------|----------|
| S001 | 2239.3(5) | 6646.5(13) | 5974.1(4)  | 37.4(2)  |
| O2   | 1992(2)   | 4575(4)    | 6345.5(15) | 49.7(5)  |
| O4   | 4411(2)   | 9960(5)    | 5627.1(15) | 59.0(6)  |
| O3   | 1320(2)   | 8333(5)    | 5831.6(17) | 62.5(6)  |
| O1   | 2859(2)   | 5159(6)    | 3306.2(16) | 72.0(8)  |
| C19  | 3735(2)   | 6456(5)    | 8293.4(15) | 33.8(5)  |
| C14  | 3389(2)   | 8053(4)    | 7648.6(16) | 32.3(5)  |
| C18  | 3546(2)   | 6713(5)    | 9157.4(15) | 34.8(5)  |
| C10  | 3665(2)   | 7790(4)    | 6736.7(17) | 34.7(5)  |
| C20  | 3922(3)   | 5094(5)    | 9835.6(18) | 43.1(6)  |
| C17  | 2998(2)   | 8710(5)    | 9352.4(18) | 38.2(6)  |
| C11  | 4656(2)   | 6214(5)    | 6756.4(17) | 38.9(6)  |
| C15  | 2785(3)   | 9983(5)    | 7832.1(19) | 40.1(6)  |
| C22  | 3253(3)   | 7446(7)    | 10872(2)   | 56.2(9)  |
| C16  | 2607(2)   | 10282(5)   | 8660.4(19) | 41.9(6)  |
| C5   | 801(3)    | 885(5)     | 2994(2)    | 47.8(7)  |
| C6   | 962(3)    | 3260(5)    | 2704.2(18) | 40.2(6)  |
| C13  | 3975(3)   | 10084(5)   | 6396(2)    | 47.7(6)  |
| C23  | 2872(3)   | 9017(6)    | 10232(2)   | 49.6(7)  |
| C1   | 1283(3)   | 3272(6)    | 1805.3(19) | 52.3(7)  |
| C21  | 3770(3)   | 5460(7)    | 10675(2)   | 52.3(8)  |
| C12  | 5457(3)   | 5009(6)    | 6721(2)    | 51.8(7)  |
| C9   | 2611(3)   | 6114(7)    | 4953(2)    | 59.2(10) |
| C7   | 1897(3)   | 4503(6)    | 3420(2)    | 47.1(7)  |

|    |         |         |            |          |
|----|---------|---------|------------|----------|
| C2 | 322(3)  | 2025(8) | 1090.7(19) | 62.4(10) |
| C4 | -178(3) | -325(7) | 2271(2)    | 61.4(9)  |
| C8 | 1577(3) | 4958(8) | 4290(2)    | 63.6(10) |
| C3 | 124(4)  | -285(8) | 1366(3)    | 72.1(12) |

**Table 3** Anisotropic Displacement Parameters ( $\text{\AA}^2 \times 10^3$ ) for 1. The Anisotropic displacement factor exponent takes the form:  $-2\pi^2[h^2a^2U_{11}+2hka^*b^*U_{12}+\dots]$ .

| Atom | $U_{11}$ | $U_{22}$ | $U_{33}$ | $U_{23}$  | $U_{13}$ | $U_{12}$  |
|------|----------|----------|----------|-----------|----------|-----------|
| S001 | 35.3(3)  | 44.5(4)  | 32.8(3)  | -4.0(3)   | 10.2(2)  | -3.3(3)   |
| O2   | 54.8(12) | 47.6(12) | 49.1(11) | -5.5(9)   | 18.5(9)  | -16.5(10) |
| O4   | 63.7(13) | 65.1(15) | 55.3(12) | 10.7(11)  | 28.4(10) | -10.1(12) |
| O3   | 45.8(12) | 67.6(16) | 64.6(14) | -5.1(12)  | -1.1(10) | 13.7(12)  |
| O1   | 61.3(14) | 102(2)   | 61.4(14) | -27.9(15) | 32.2(12) | -35.9(15) |
| C19  | 34.3(10) | 29.8(12) | 36.5(11) | -2.7(11)  | 8.5(8)   | 1.4(10)   |
| C14  | 31.2(11) | 30.4(12) | 34.0(11) | -2.5(9)   | 6.8(9)   | -0.2(10)  |
| C18  | 30.2(10) | 37.1(12) | 34.9(11) | -3.7(12)  | 5.2(8)   | -2.0(11)  |
| C10  | 35.5(12) | 32.7(13) | 35.6(12) | 0.5(10)   | 9.6(10)  | -1.0(10)  |
| C20  | 40.9(13) | 46.0(15) | 39.9(13) | 2.6(12)   | 6.8(11)  | 0.3(12)   |
| C17  | 32.7(11) | 42.6(15) | 38.7(13) | -6.7(11)  | 8.5(10)  | 0.4(11)   |
| C11  | 38.3(12) | 41.3(16) | 38.9(12) | -2.1(11)  | 13.3(10) | -5.6(11)  |
| C15  | 42.9(13) | 31.7(13) | 43.4(13) | -1.6(11)  | 8.1(11)  | 4.3(11)   |
| C22  | 49.9(16) | 85(3)    | 36.8(14) | -6.3(14)  | 17.1(13) | -2.5(16)  |
| C16  | 40.8(13) | 36.7(14) | 48.2(15) | -6.8(12)  | 12.2(11) | 7.8(11)   |
| C5   | 49.7(16) | 51.4(17) | 44.4(15) | 1.4(12)   | 16.4(12) | -4.2(13)  |
| C6   | 40.0(13) | 47.6(16) | 33.6(12) | -4.1(11)  | 11.1(10) | 0.3(12)   |
| C13  | 55.4(16) | 40.3(15) | 51.4(15) | 4.4(13)   | 21.7(13) | -5.8(13)  |
| C23  | 44.2(15) | 62(2)    | 45.3(15) | -12.0(14) | 16.6(12) | 3.8(14)   |
| C1   | 61.4(18) | 61.0(19) | 36.1(13) | 2.2(13)   | 16.1(13) | -2.5(16)  |
| C21  | 49.2(16) | 70(2)    | 36.3(14) | 8.9(14)   | 9.0(12)  | -1.7(15)  |
| C12  | 44.3(15) | 51.0(17) | 64.7(18) | 0.6(15)   | 22.7(14) | 6.0(14)   |
| C9   | 55.3(16) | 89(3)    | 37.7(14) | -18.5(15) | 19.4(12) | -25.5(17) |
| C7   | 47.4(15) | 54.7(18) | 41.1(14) | -8.0(12)  | 15.5(12) | -10.6(13) |
| C2   | 54.0(16) | 98(3)    | 33.3(13) | -11.3(17) | 9.2(12)  | 8(2)      |
| C4   | 62.7(19) | 67(2)    | 61.5(19) | -21.8(17) | 28.9(16) | -21.4(17) |
| C8   | 55.4(18) | 96(3)    | 43.7(15) | -25.7(18) | 21.2(14) | -34(2)    |
| C3   | 72(2)    | 89(3)    | 64(2)    | -40(2)    | 33.2(18) | -21(2)    |

**Table 4** Bond Lengths for 3ai.

| Atom Atom | Length/ $\text{\AA}$ | Atom Atom | Length/ $\text{\AA}$ |
|-----------|----------------------|-----------|----------------------|
|-----------|----------------------|-----------|----------------------|

|      |     |          |     |     |          |
|------|-----|----------|-----|-----|----------|
| S001 | O2  | 1.436(2) | C17 | C16 | 1.409(4) |
| S001 | O3  | 1.428(2) | C17 | C23 | 1.417(4) |
| S001 | C10 | 1.851(3) | C11 | C12 | 1.174(4) |
| S001 | C9  | 1.770(3) | C15 | C16 | 1.361(4) |
| O4   | C13 | 1.407(4) | C22 | C23 | 1.354(5) |
| O1   | C7  | 1.214(4) | C22 | C21 | 1.403(5) |
| C19  | C14 | 1.366(4) | C5  | C6  | 1.529(4) |
| C19  | C18 | 1.418(3) | C5  | C4  | 1.527(5) |
| C14  | C10 | 1.533(3) | C6  | C1  | 1.529(4) |
| C14  | C15 | 1.418(4) | C6  | C7  | 1.506(4) |
| C18  | C20 | 1.413(4) | C1  | C2  | 1.521(5) |
| C18  | C17 | 1.425(4) | C9  | C8  | 1.500(4) |
| C10  | C11 | 1.463(4) | C7  | C8  | 1.510(4) |
| C10  | C13 | 1.557(4) | C2  | C3  | 1.494(7) |
| C20  | C21 | 1.373(4) | C4  | C3  | 1.528(5) |

**Table 5** Bond Angles for **3ai**.

| Atom Atom Atom Angle <sup>°</sup> |      |      |            | Atom Atom Atom Angle <sup>°</sup> |     |      |          |
|-----------------------------------|------|------|------------|-----------------------------------|-----|------|----------|
| O2                                | S001 | C10  | 107.49(12) | C23                               | C17 | C18  | 118.5(3) |
| O2                                | S001 | C9   | 108.49(17) | C12                               | C11 | C10  | 175.7(3) |
| O3                                | S001 | O2   | 118.14(15) | C16                               | C15 | C14  | 120.0(3) |
| O3                                | S001 | C10  | 107.54(14) | C23                               | C22 | C21  | 120.7(3) |
| O3                                | S001 | C9   | 109.33(18) | C15                               | C16 | C17  | 121.9(3) |
| C9                                | S001 | C10  | 105.08(13) | C4                                | C5  | C6   | 110.8(3) |
| C14                               | C19  | C18  | 121.6(2)   | C1                                | C6  | C5   | 110.3(3) |
| C19                               | C14  | C10  | 120.6(2)   | C7                                | C6  | C5   | 111.6(2) |
| C19                               | C14  | C15  | 119.5(2)   | C7                                | C6  | C1   | 112.0(2) |
| C15                               | C14  | C10  | 119.9(2)   | O4                                | C13 | C10  | 113.6(3) |
| C19                               | C18  | C17  | 118.5(2)   | C22                               | C23 | C17  | 120.9(3) |
| C20                               | C18  | C19  | 122.1(3)   | C2                                | C1  | C6   | 111.1(3) |
| C20                               | C18  | C17  | 119.3(2)   | C20                               | C21 | C22  | 120.5(3) |
| C14                               | C10  | S001 | 105.39(16) | C8                                | C9  | S001 | 111.4(2) |
| C14                               | C10  | C13  | 109.9(2)   | O1                                | C7  | C6   | 122.1(3) |
| C11                               | C10  | S001 | 107.32(18) | O1                                | C7  | C8   | 120.7(3) |
| C11                               | C10  | C14  | 113.2(2)   | C6                                | C7  | C8   | 117.2(2) |
| C11                               | C10  | C13  | 110.2(2)   | C3                                | C2  | C1   | 112.8(3) |
| C13                               | C10  | S001 | 110.70(19) | C5                                | C4  | C3   | 111.4(3) |
| C21                               | C20  | C18  | 120.1(3)   | C9                                | C8  | C7   | 111.3(3) |
| C16                               | C17  | C18  | 118.3(2)   | C2                                | C3  | C4   | 111.4(3) |

**Table 6** Hydrogen Atom Coordinates ( $\text{\AA}\times 10^4$ ) and Isotropic Displacement Parameters ( $\text{\AA}^2\times 10^3$ ) for **3ai**.

| Atom | <i>x</i> | <i>y</i> | <i>z</i> | U(eq) |
|------|----------|----------|----------|-------|
| H4   | 5086.11  | 9353.8   | 5756.33  | 88    |
| H19  | 4104.24  | 5169.18  | 8162.53  | 41    |
| H20  | 4272.17  | 3779.01  | 9713.18  | 52    |
| H15  | 2510.43  | 11043.3  | 7386.88  | 48    |
| H22  | 3170.71  | 7685.21  | 11446.48 | 67    |
| H16  | 2215.5   | 11561.26 | 8772.8   | 50    |
| H5A  | 1578.5   | 103.6    | 3101.37  | 57    |
| H5B  | 561.99   | 901.84   | 3550.53  | 57    |
| H6   | 168.85   | 4014.72  | 2614.34  | 48    |
| H13A | 3241.36  | 10998.56 | 6260.96  | 57    |
| H13B | 4593.39  | 10803.5  | 6873.51  | 57    |
| H23  | 2523.08  | 10316.43 | 10371.25 | 60    |
| H1A  | 1331.56  | 4787.36  | 1611.54  | 63    |
| H1B  | 2082.27  | 2589.21  | 1880.15  | 63    |
| H21  | 4012.27  | 4383.44  | 11118.03 | 63    |
| H12  | 6091.2   | 4053.6   | 6693.2   | 62    |
| H9A  | 2787.03  | 7500.02  | 4696.97  | 71    |
| H9B  | 3345.43  | 5202.75  | 5072.19  | 71    |
| H2A  | -451.91  | 2823.25  | 963.57   | 75    |
| H2B  | 580.06   | 1977.8   | 541.71   | 75    |
| H4A  | -971.9   | 369.28   | 2208.45  | 74    |
| H4B  | -233.23  | -1847.56 | 2454.93  | 74    |
| H8A  | 843.16   | 5868.77  | 4170.41  | 76    |
| H8B  | 1401     | 3571.36  | 4546.19  | 76    |
| H3A  | 860.12   | -1151.78 | 1407.58  | 86    |
| H3B  | -547.35  | -954.13  | 912.22   | 86    |



## 7. NMR spectra of compounds

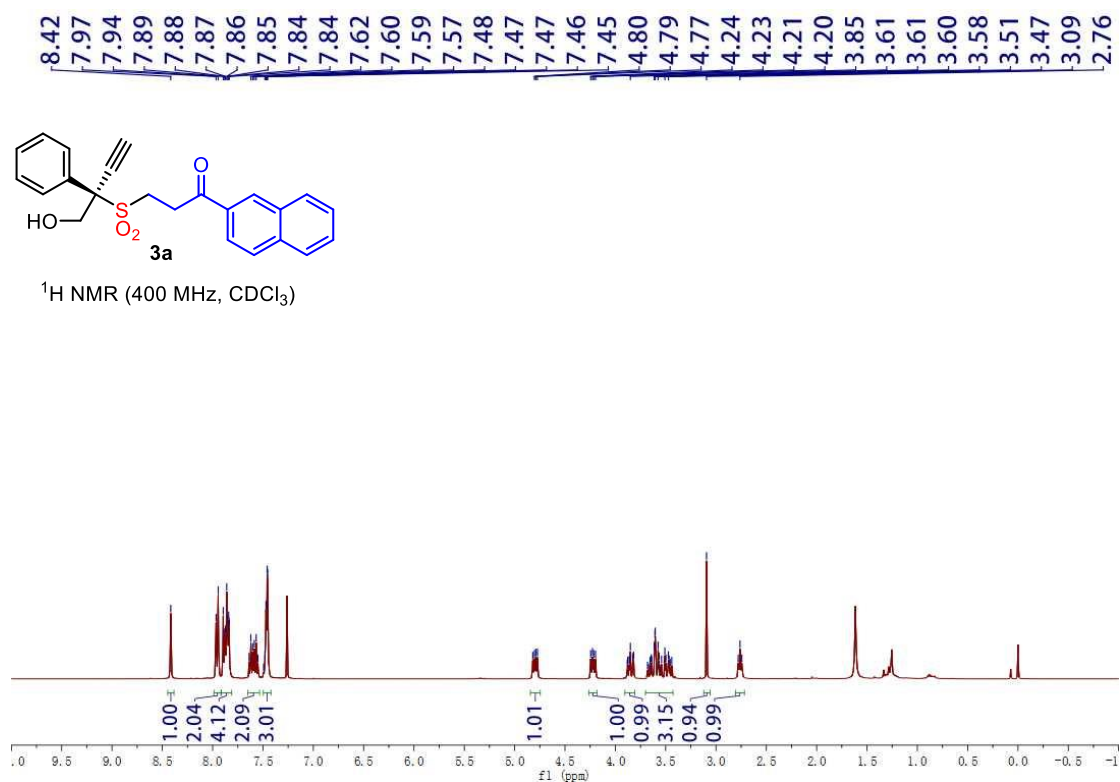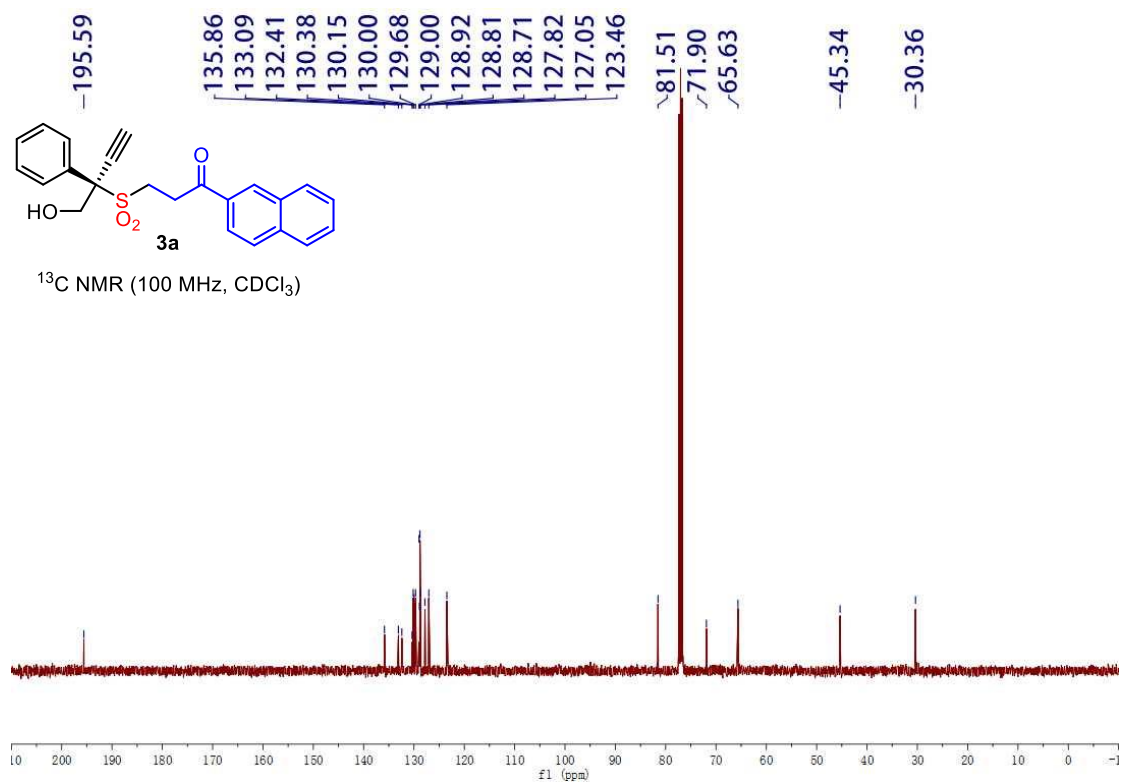

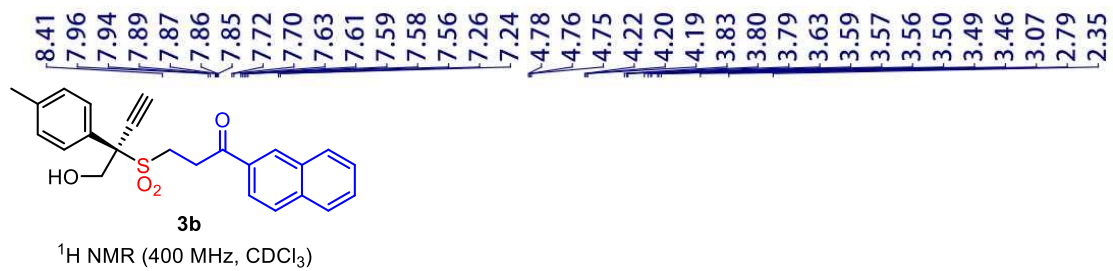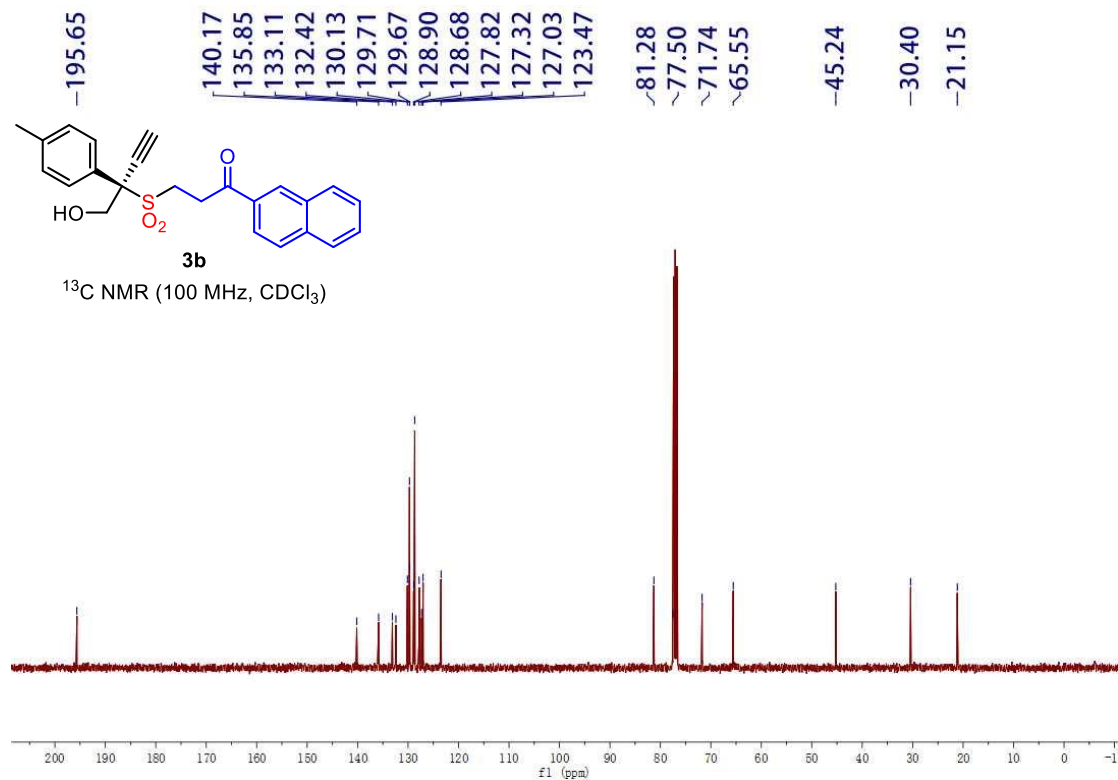

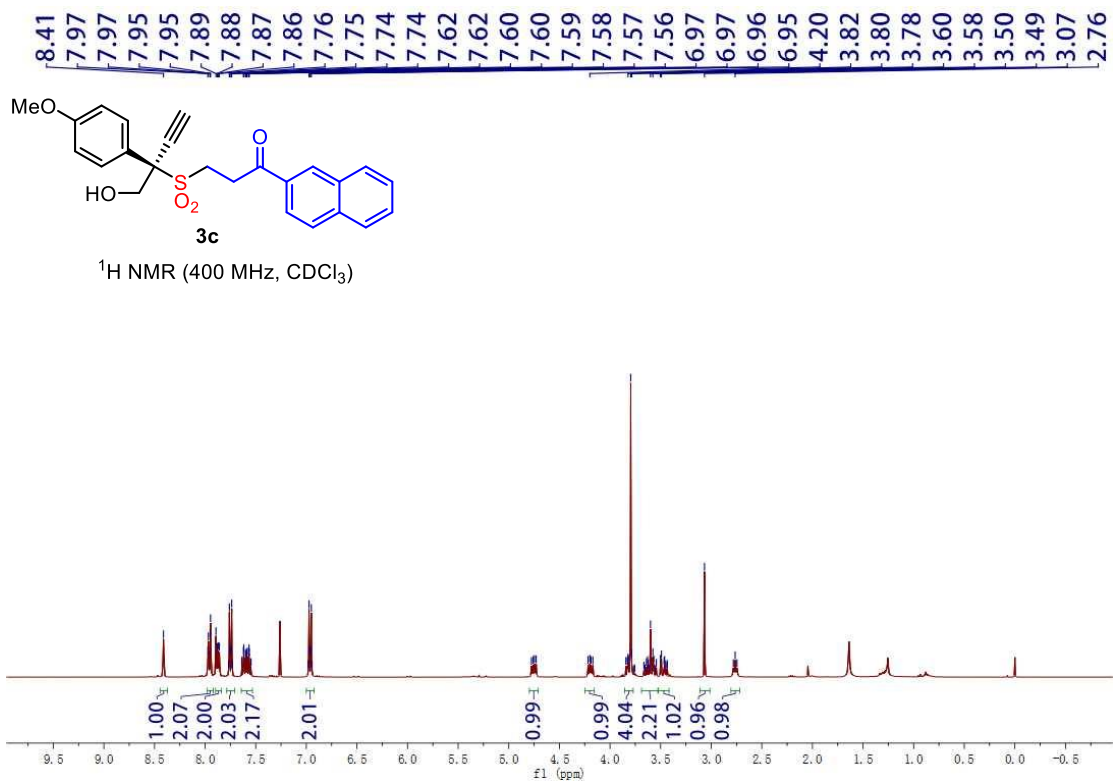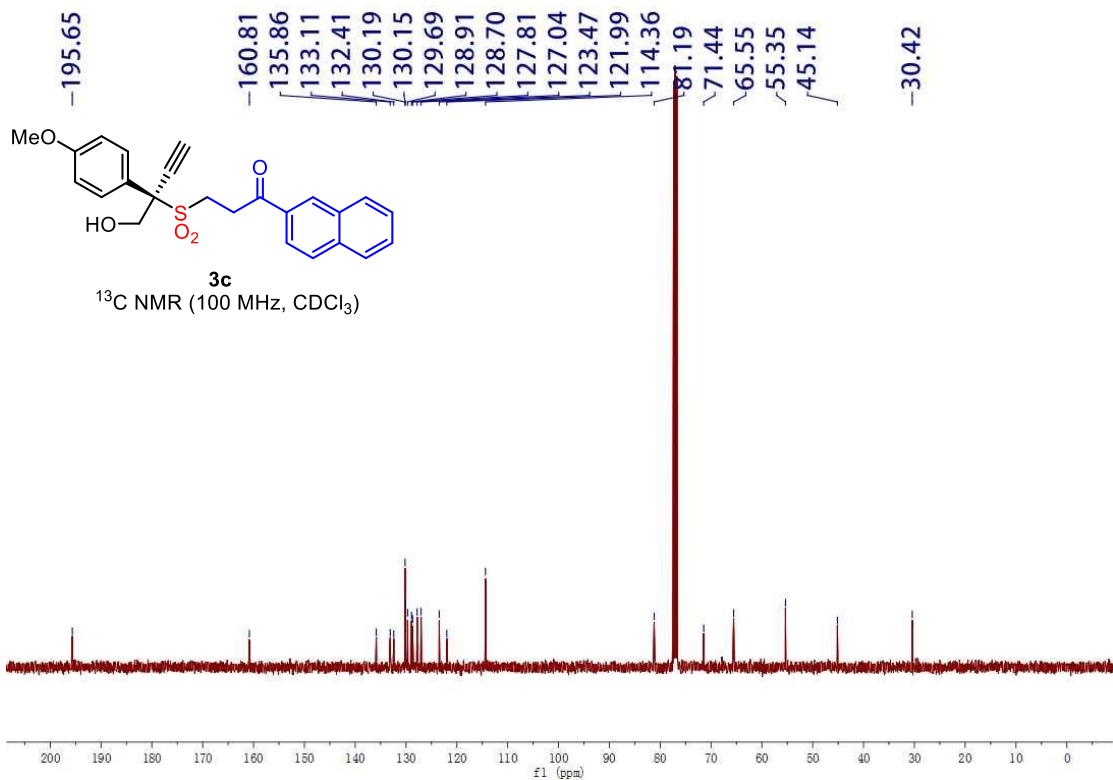

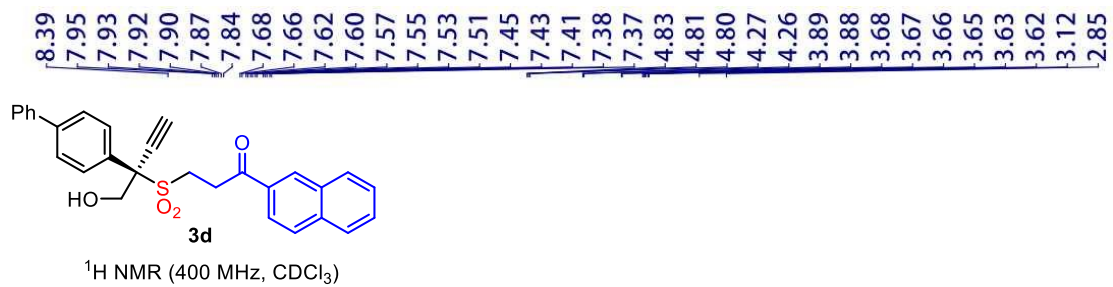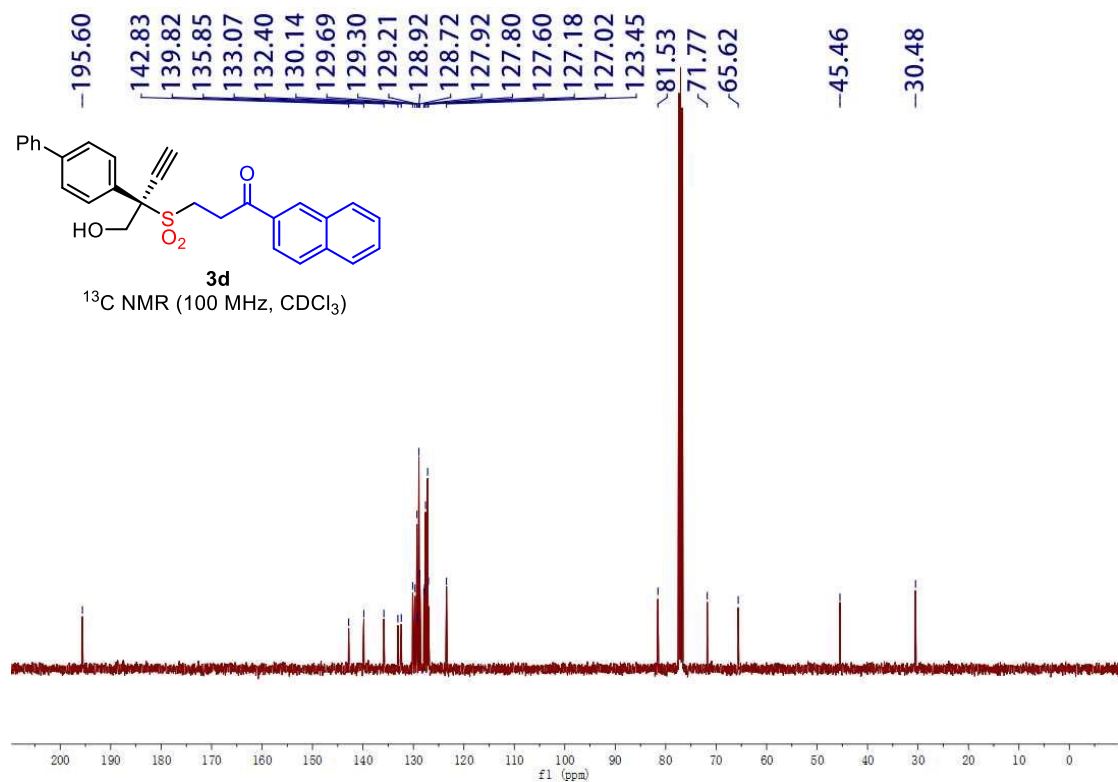

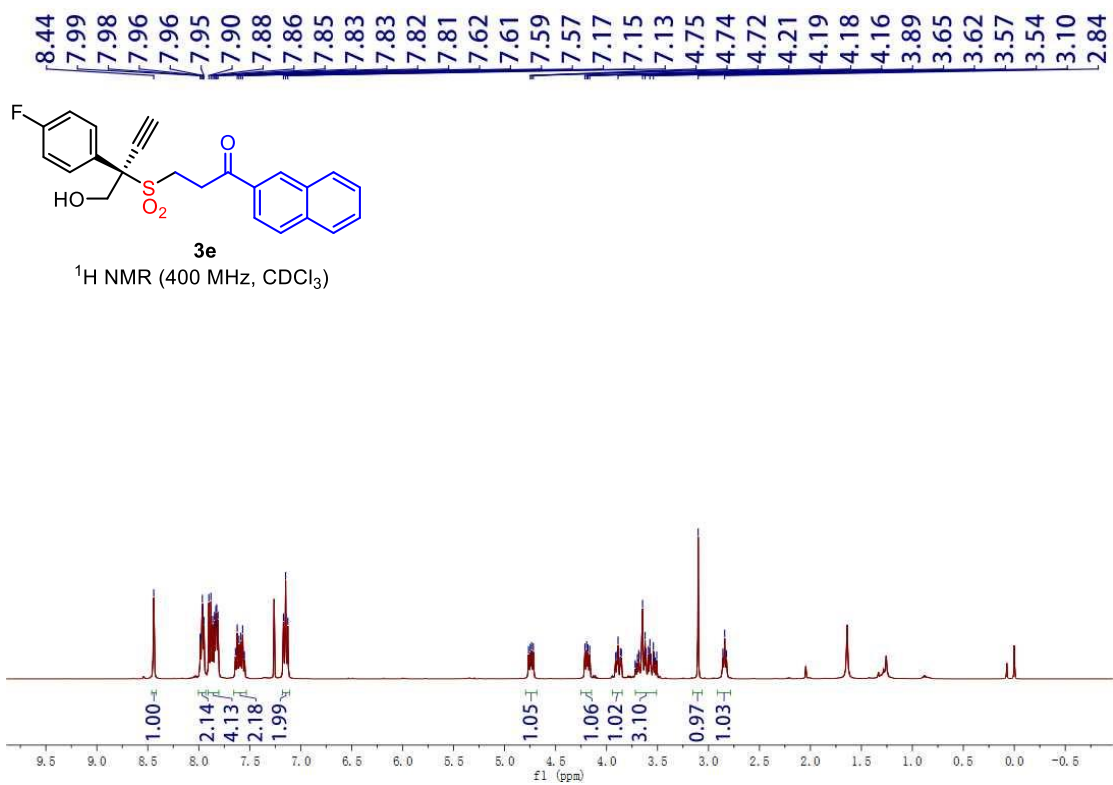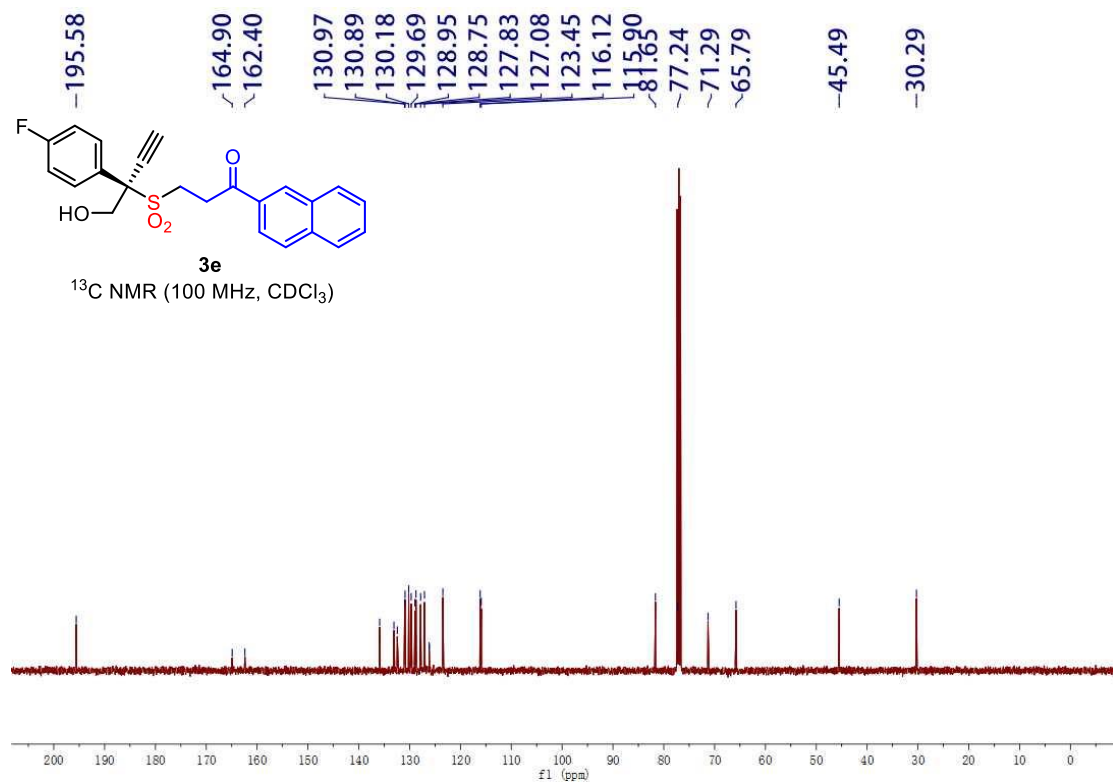

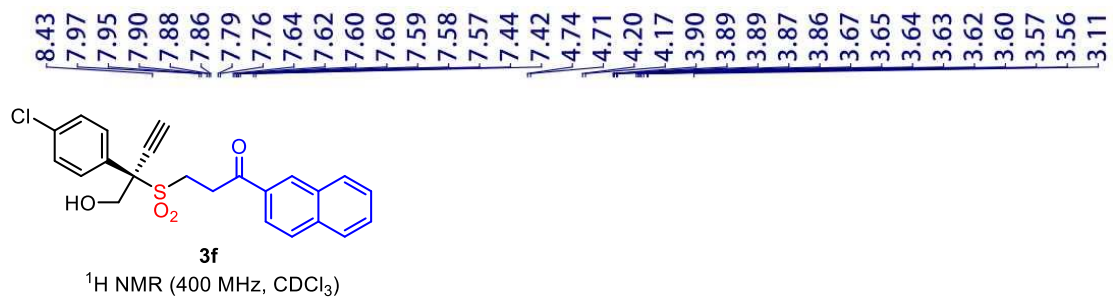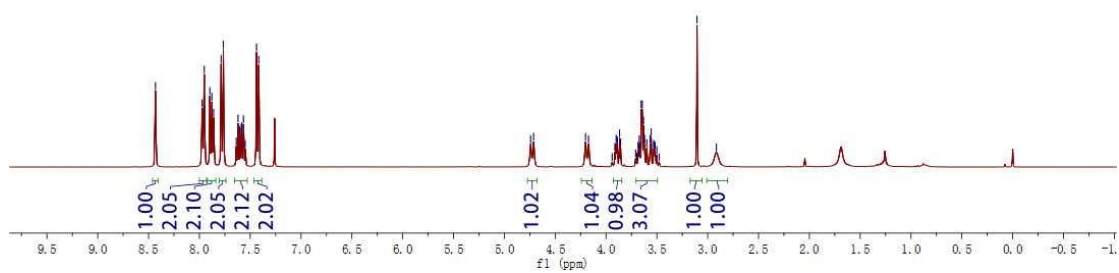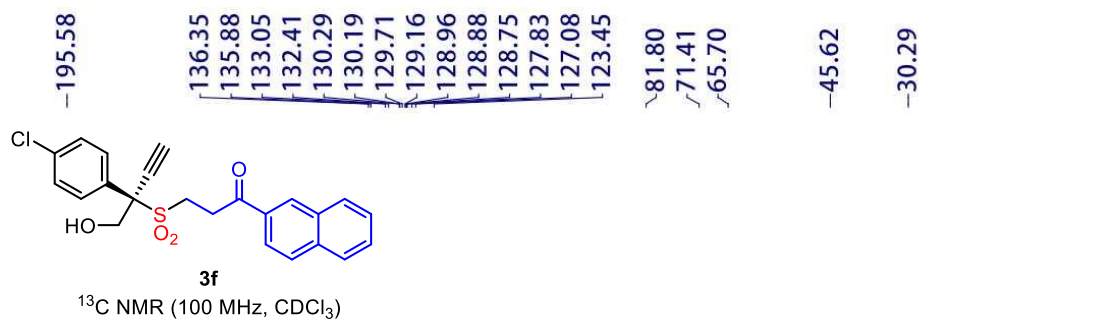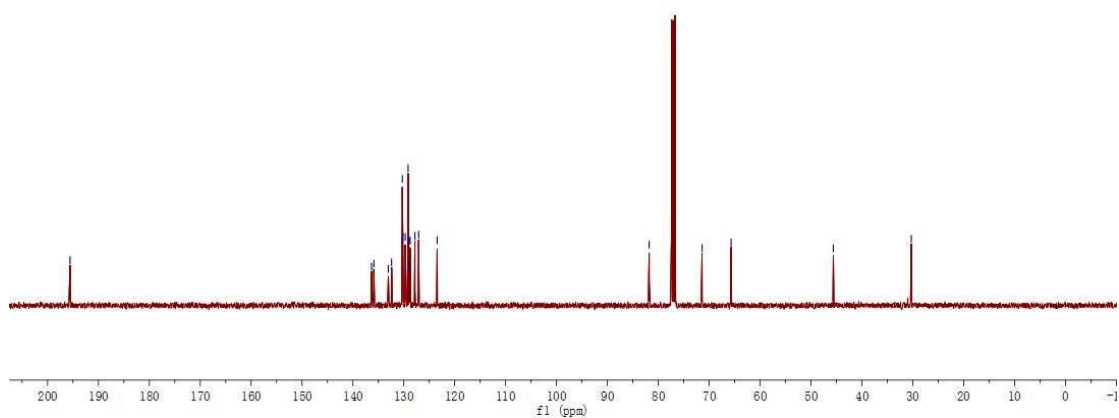

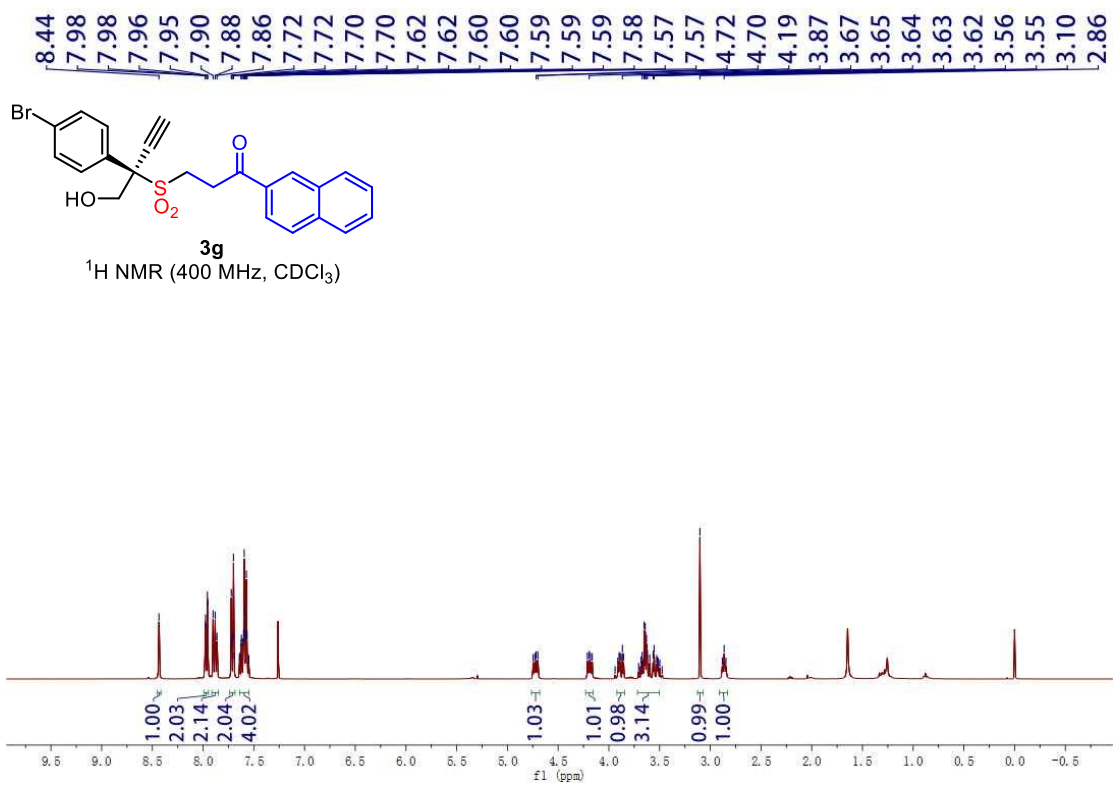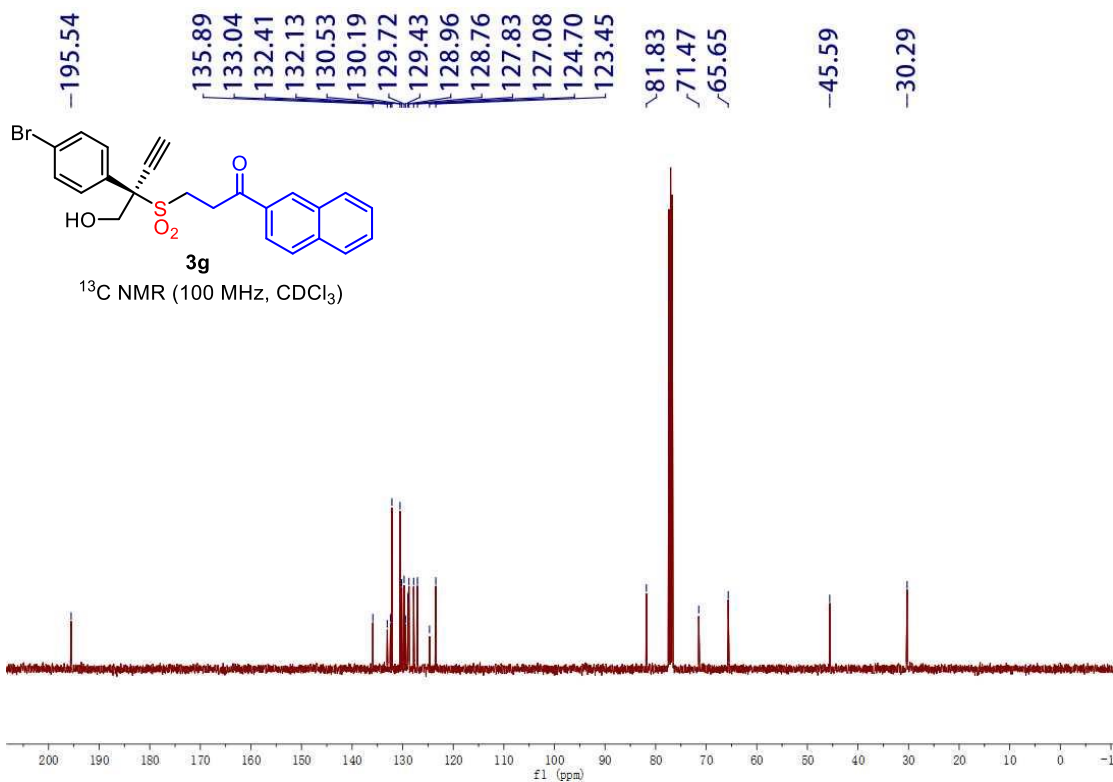

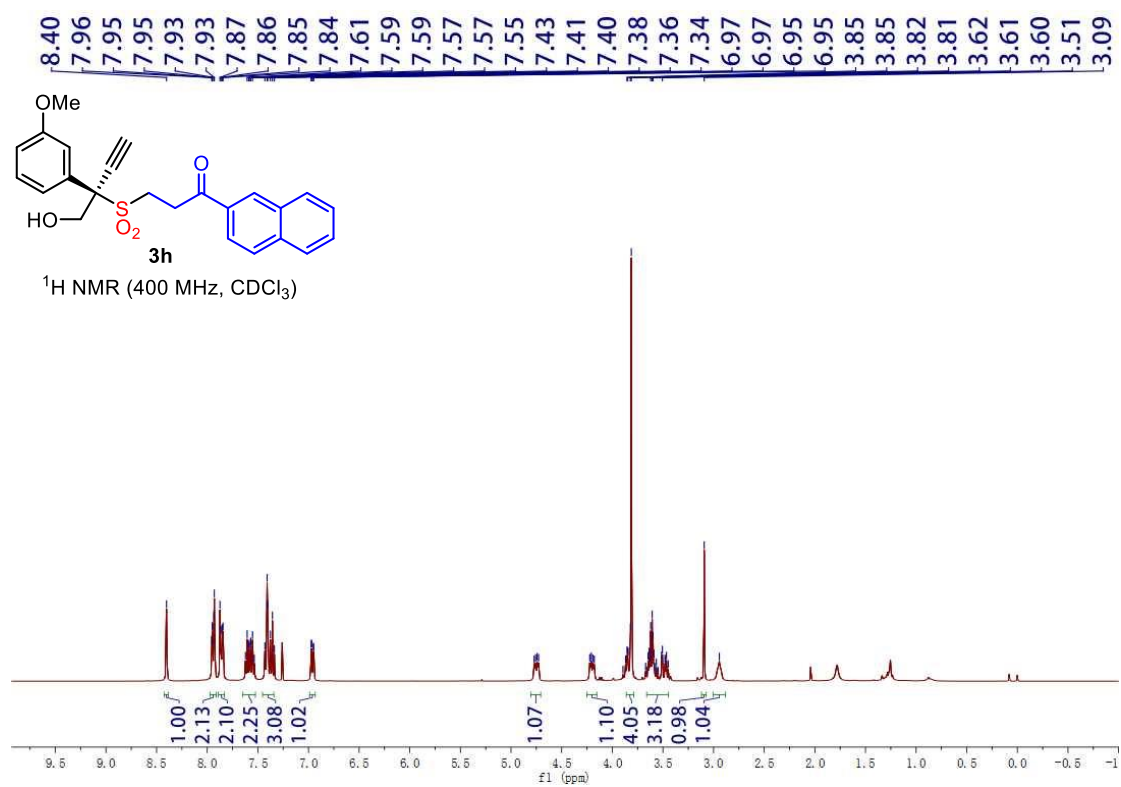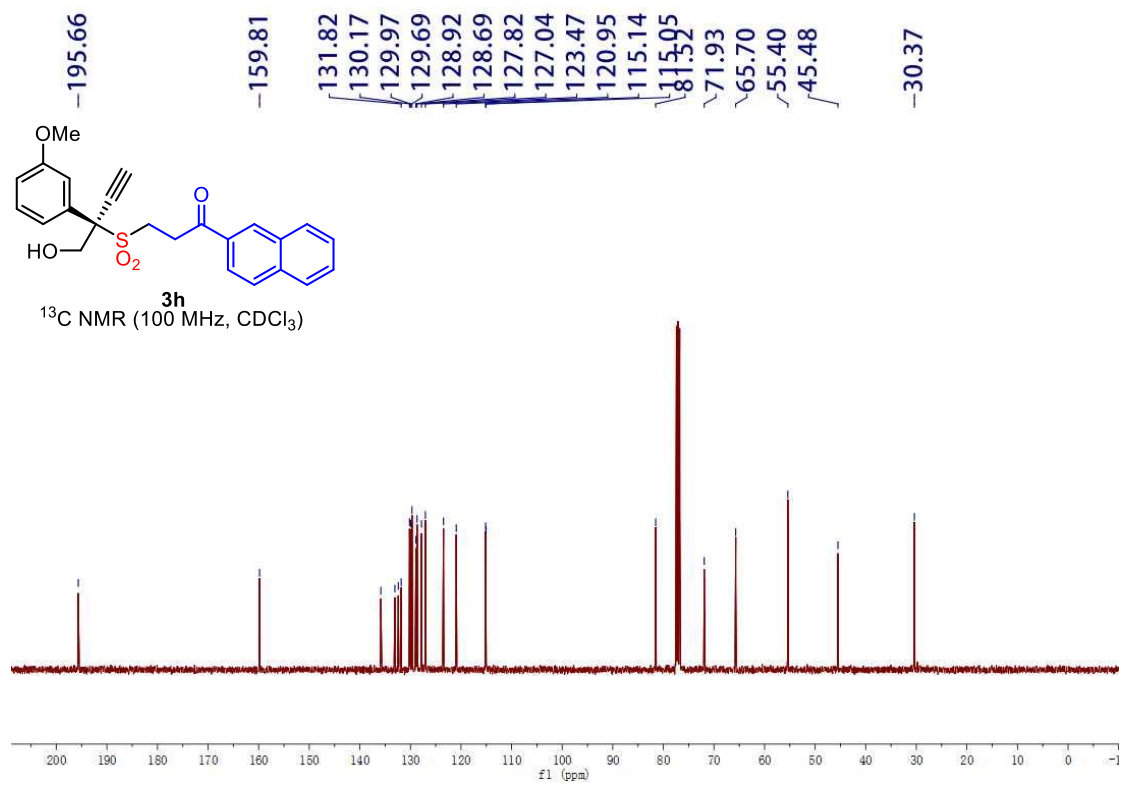



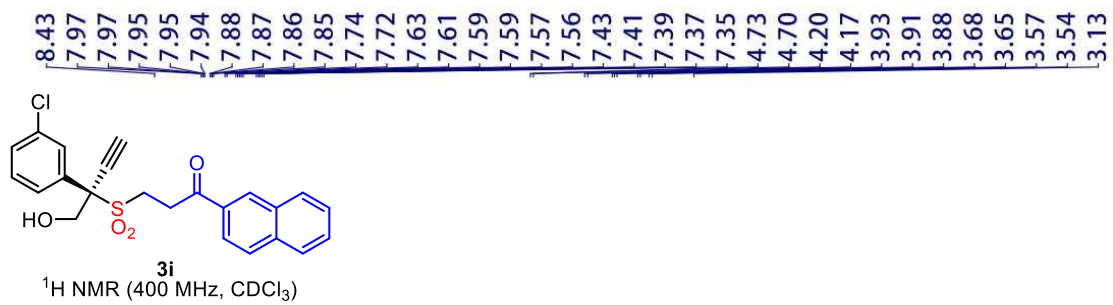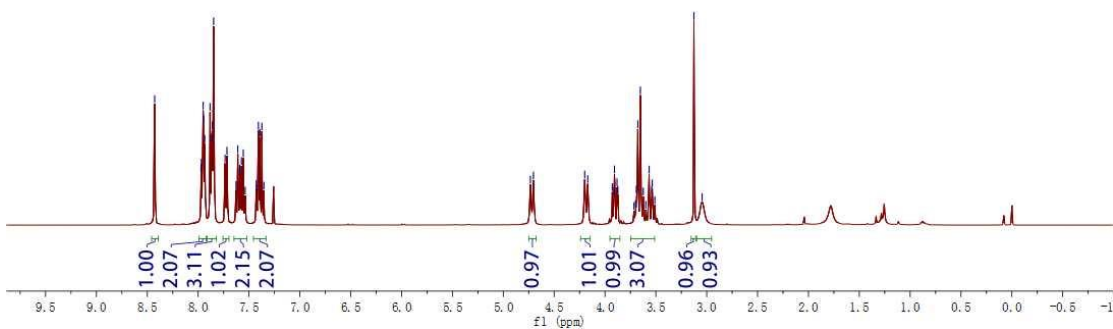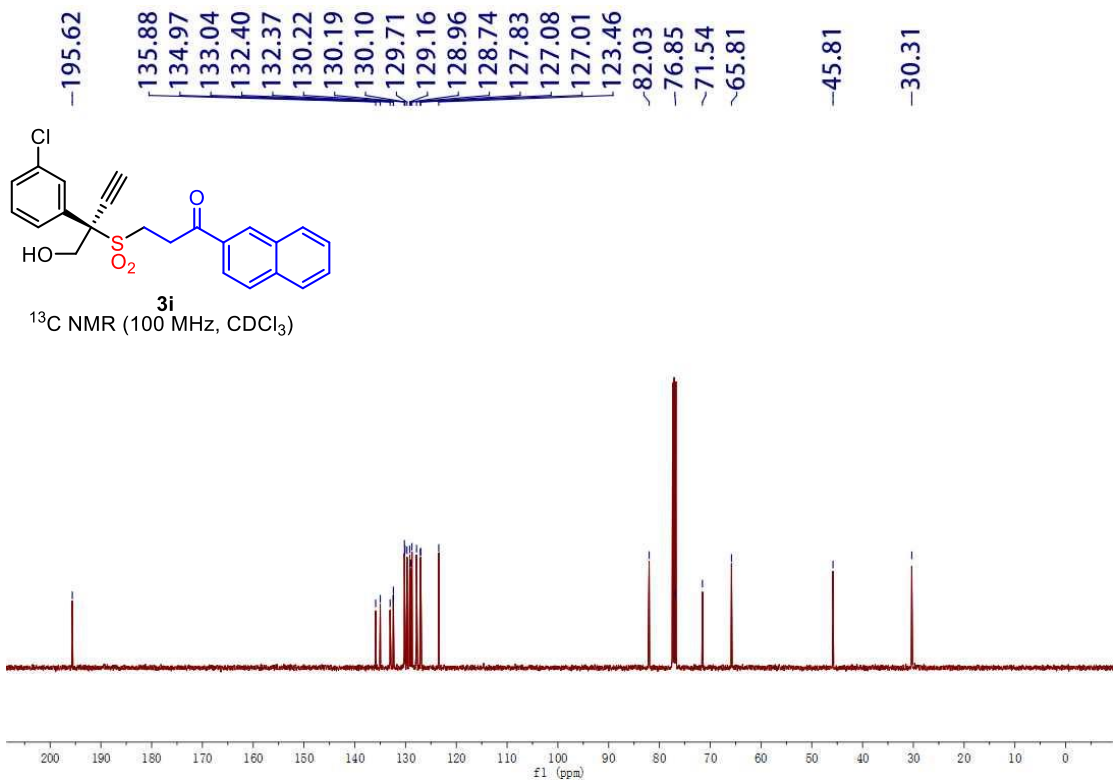

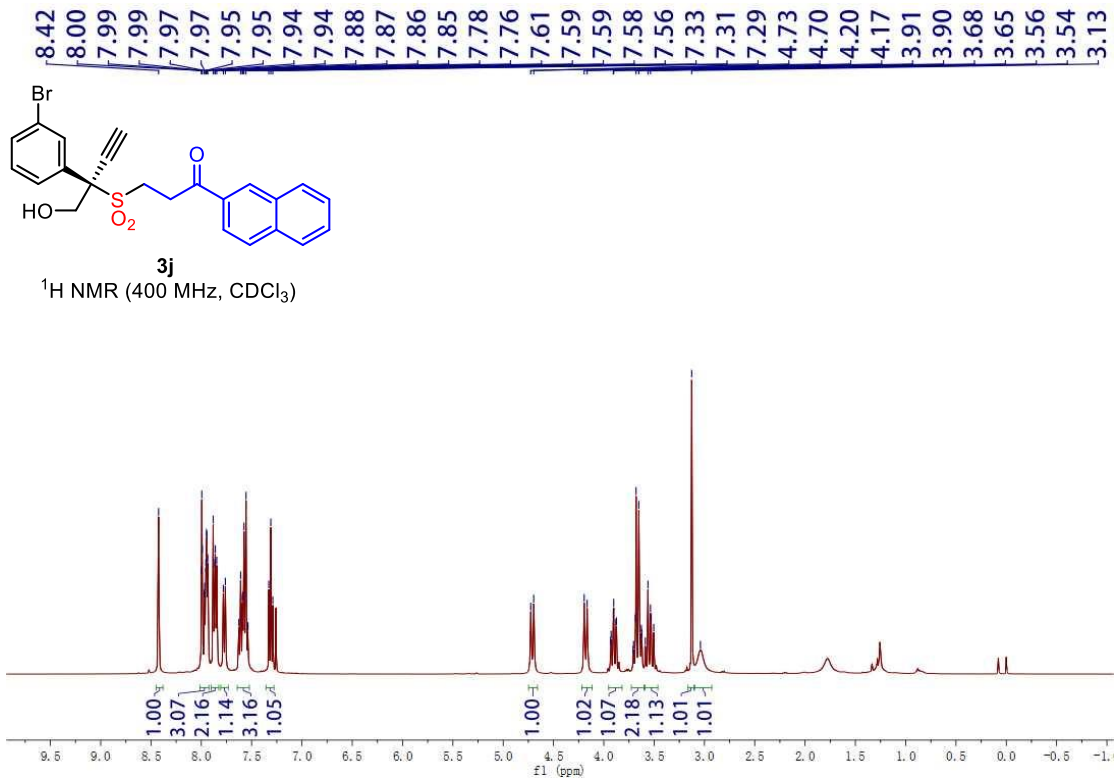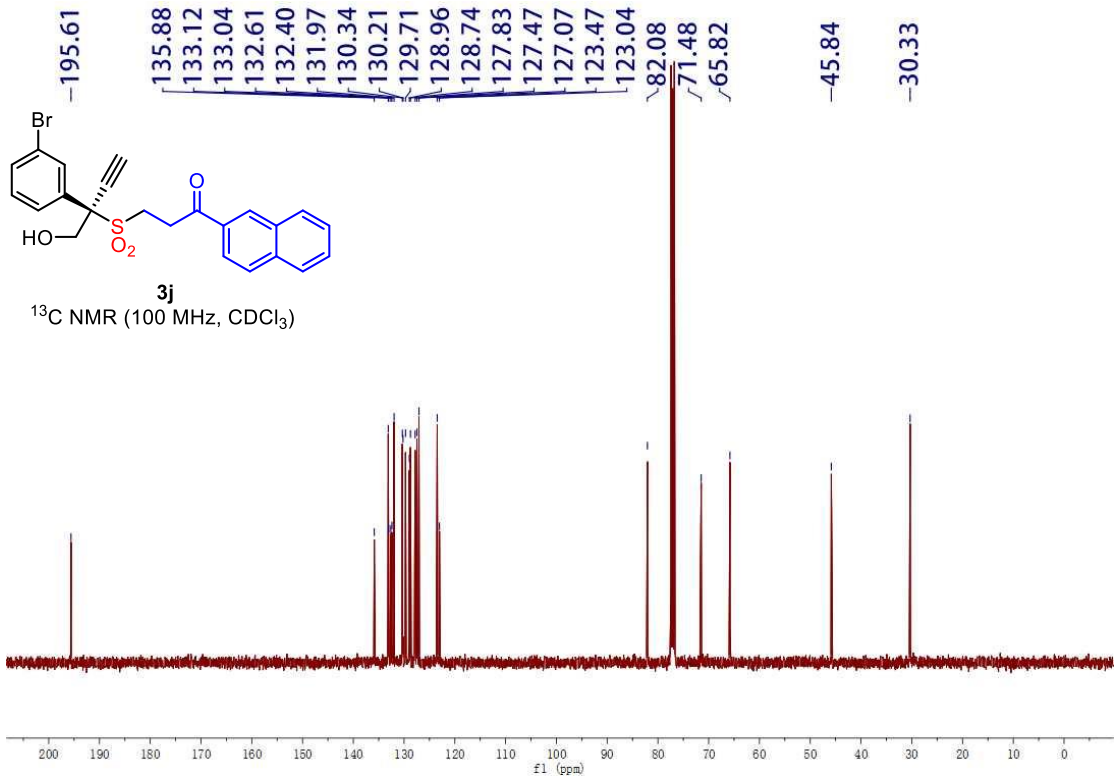

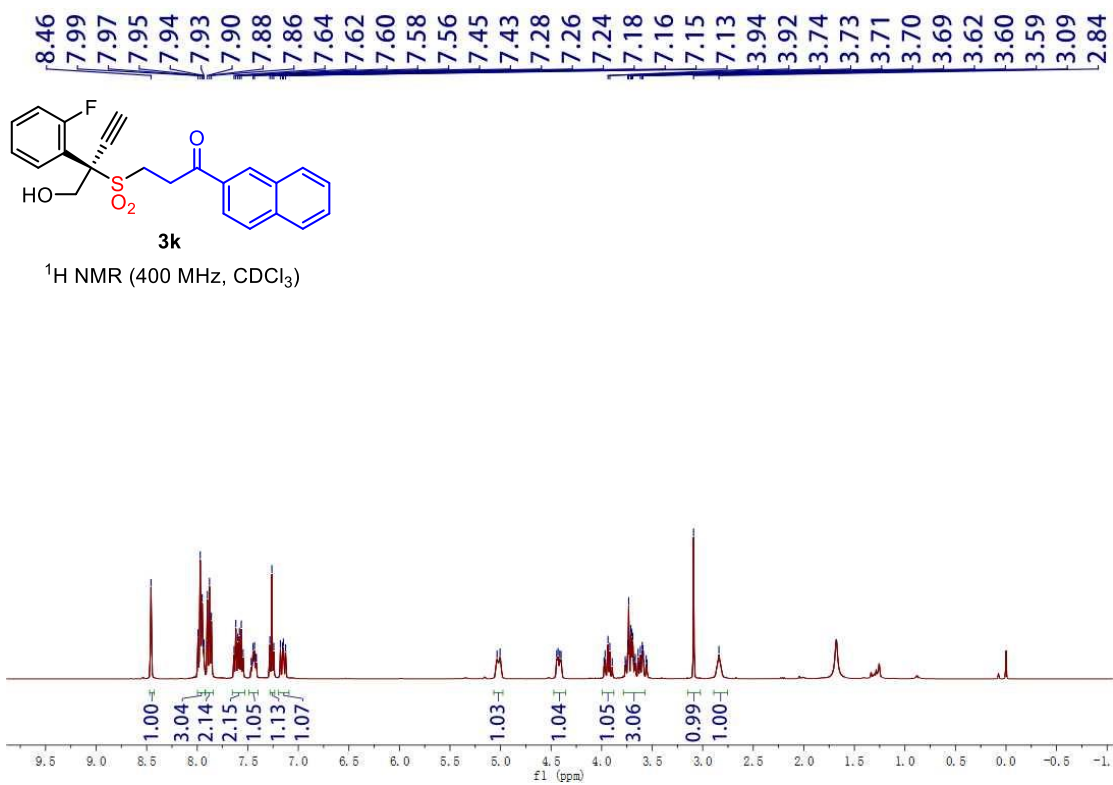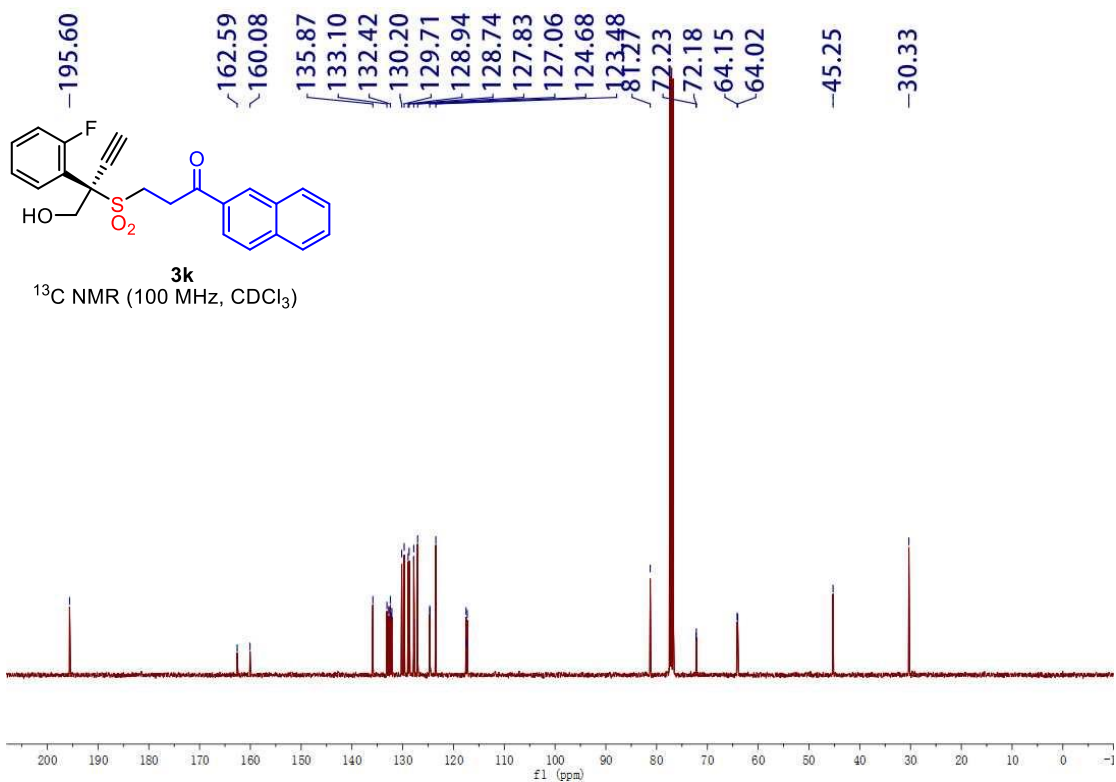

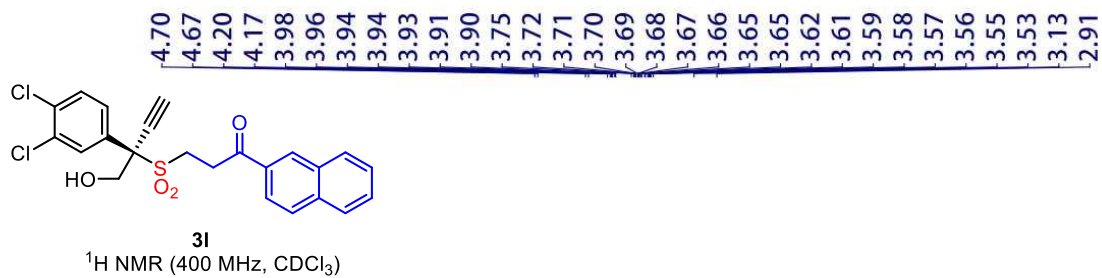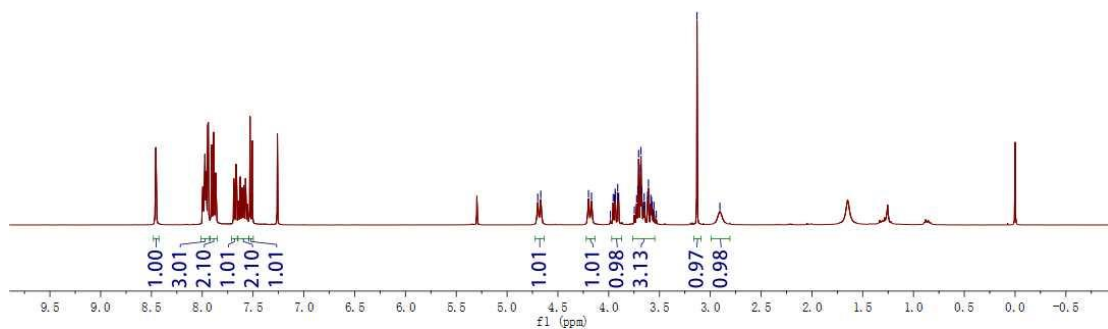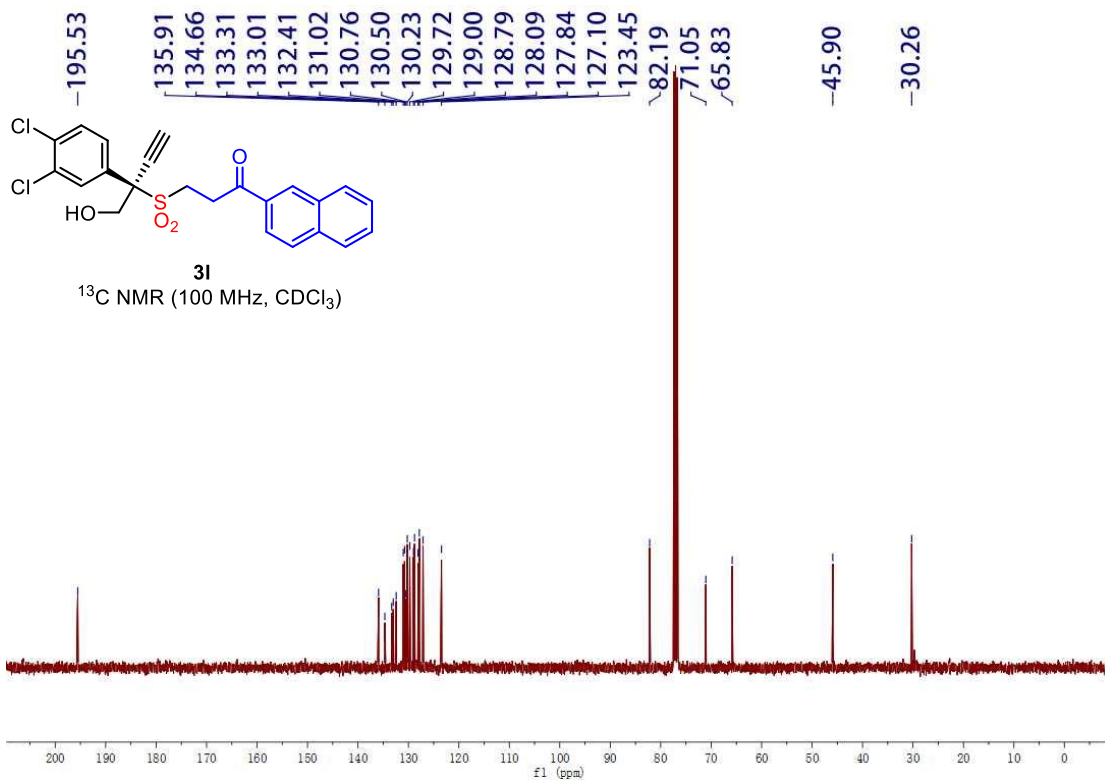

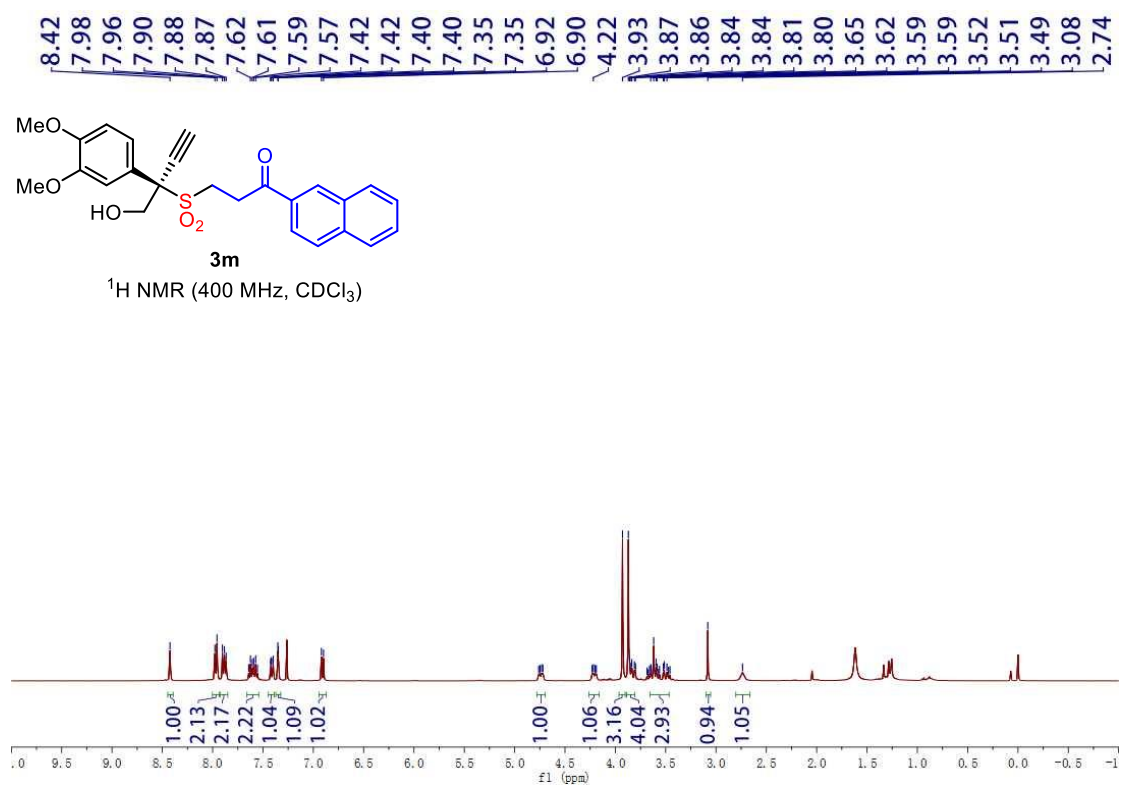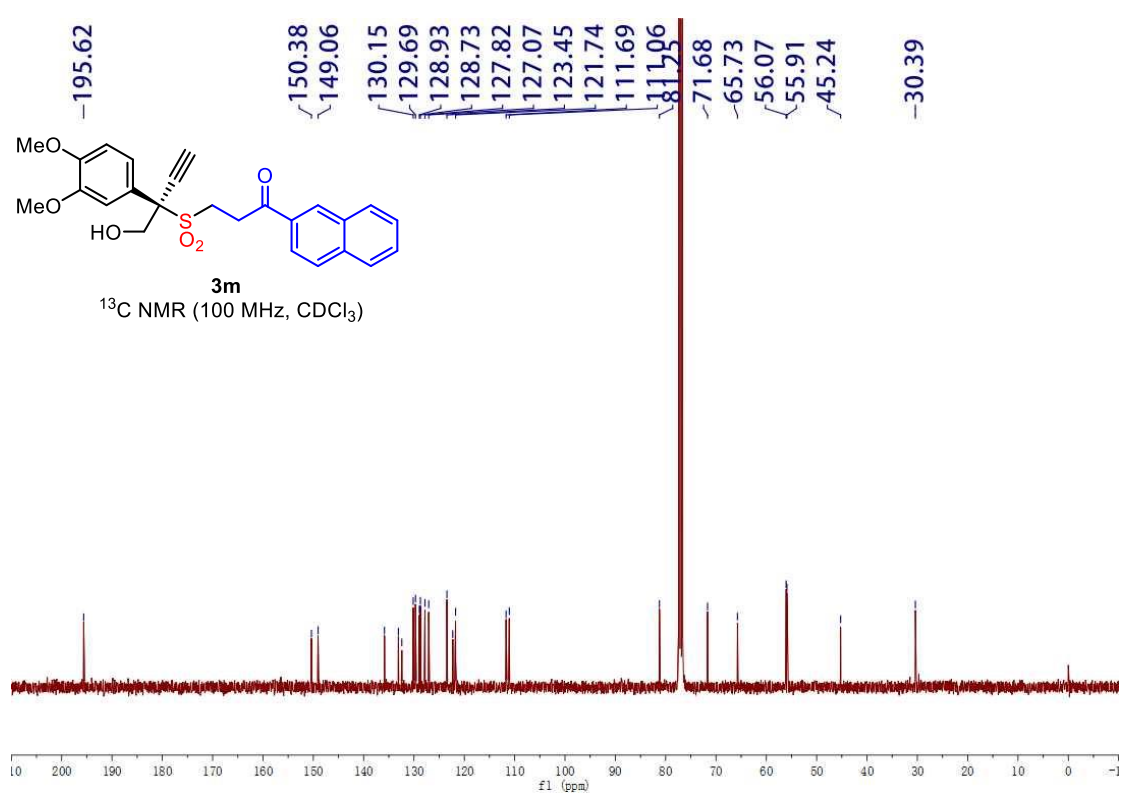

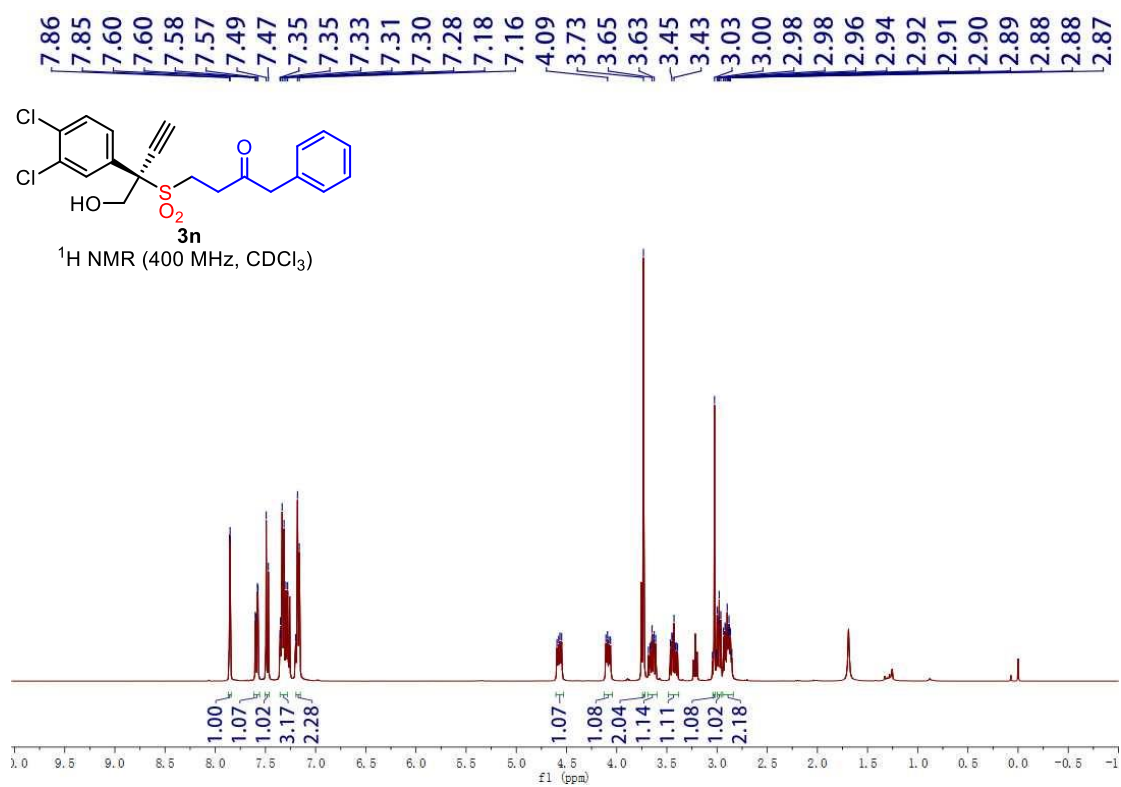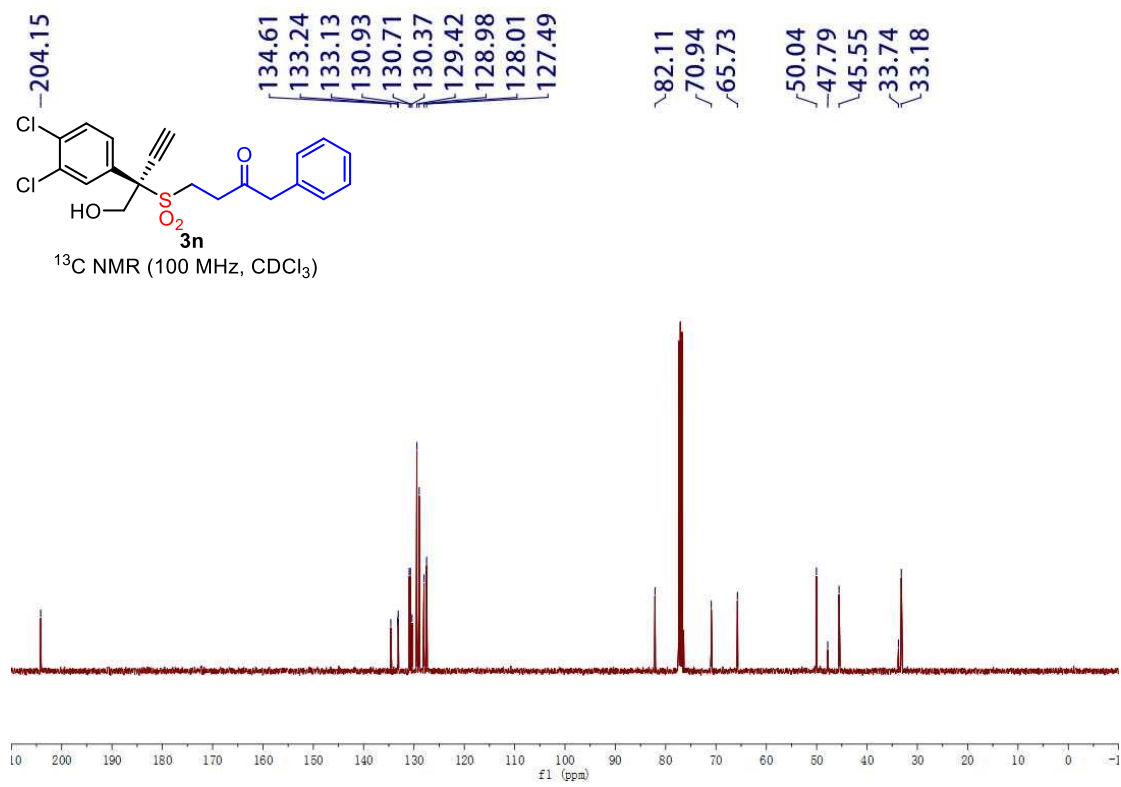

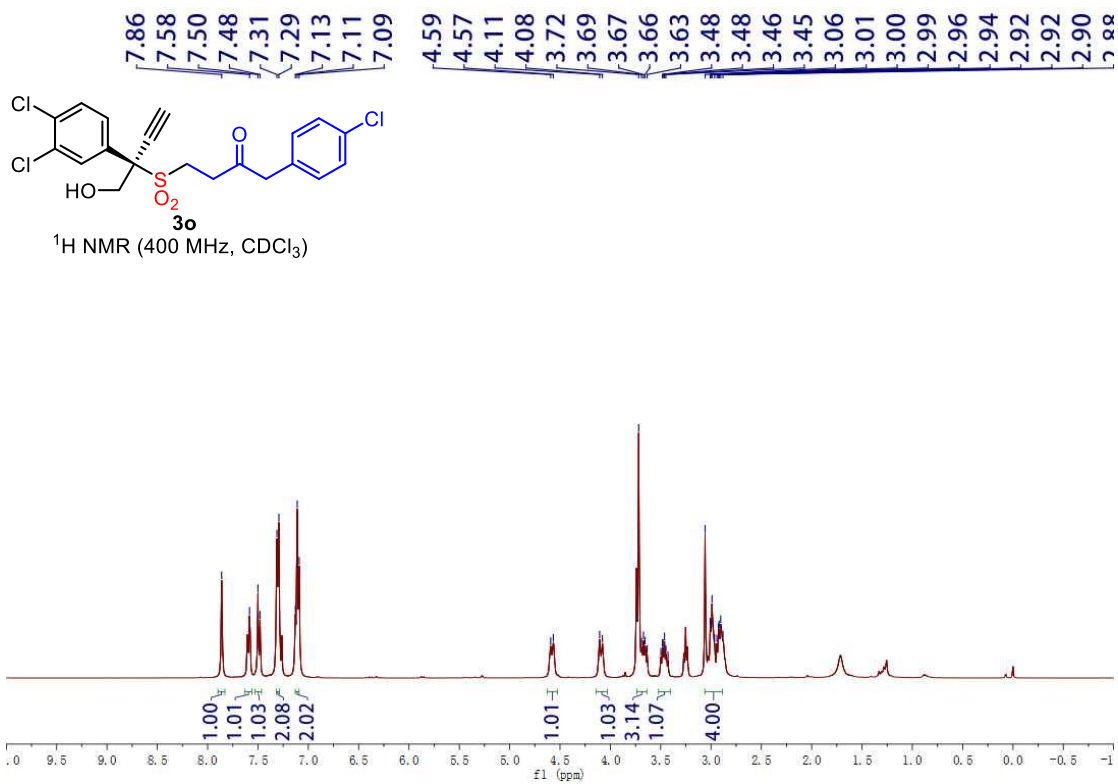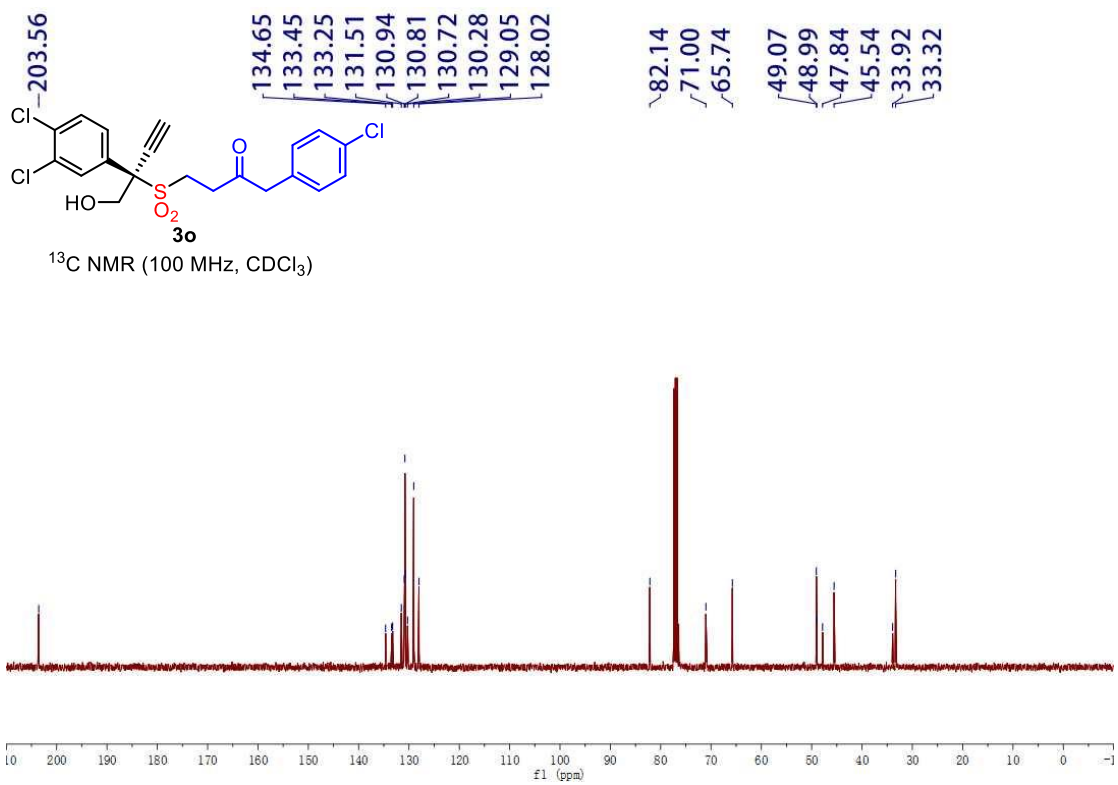

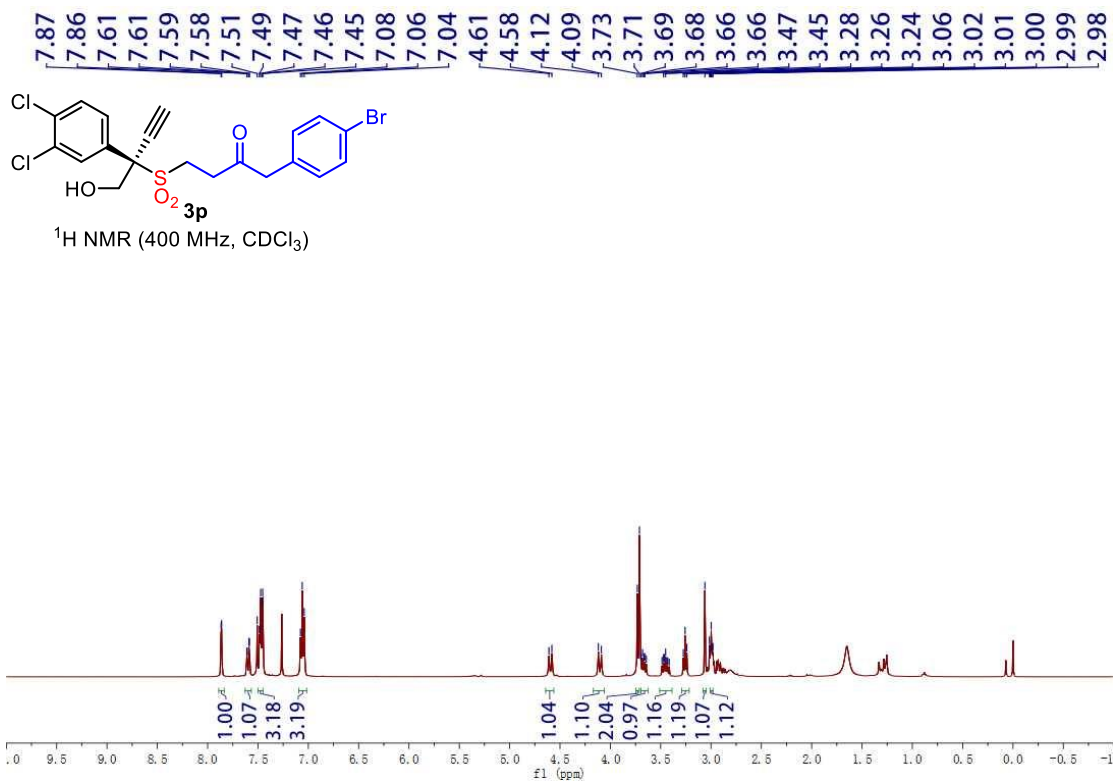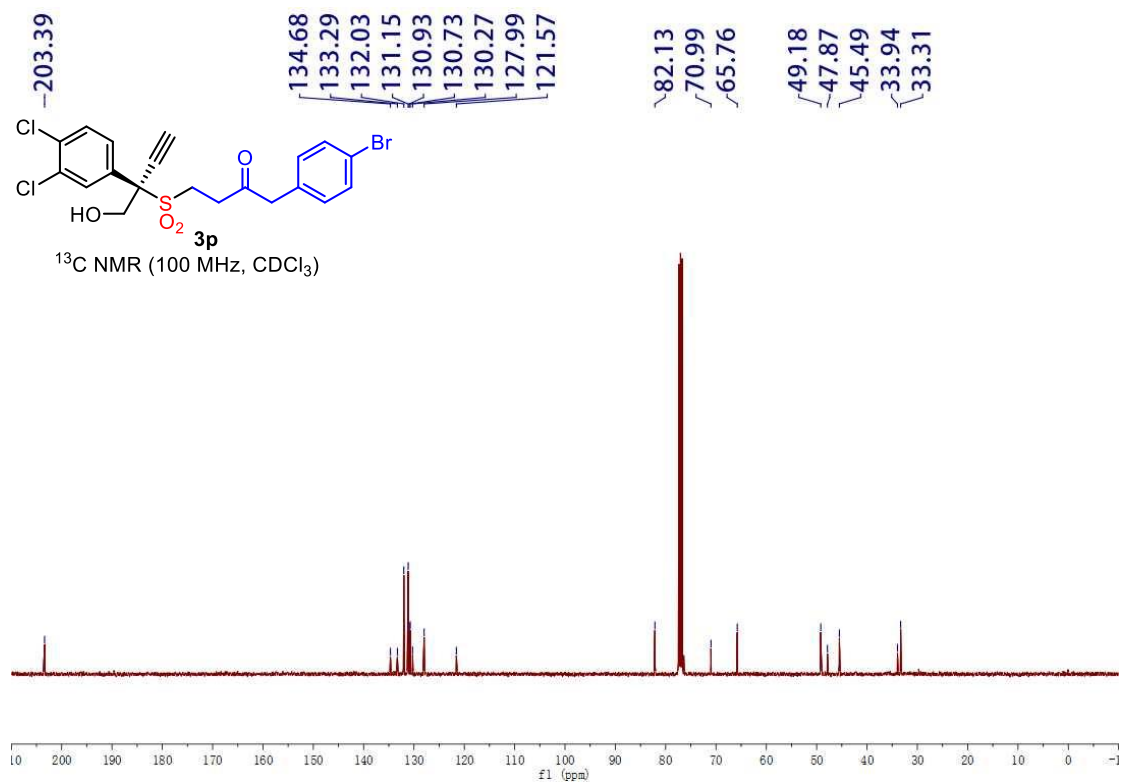



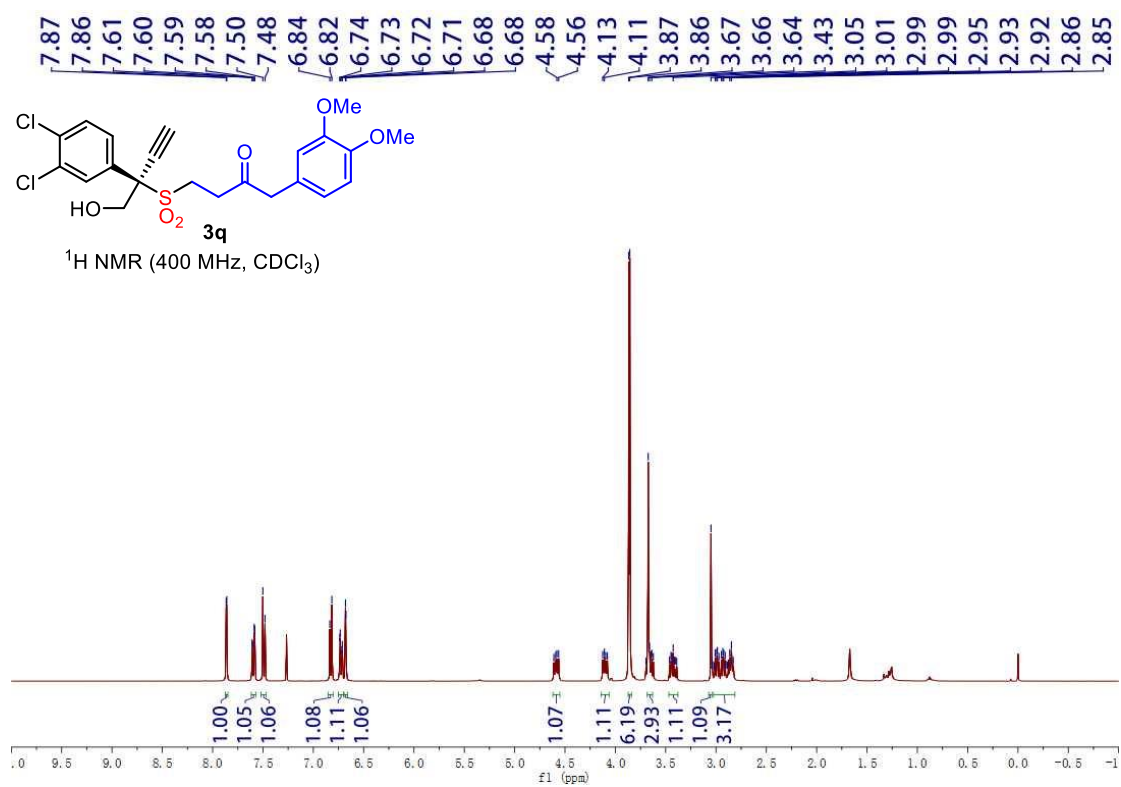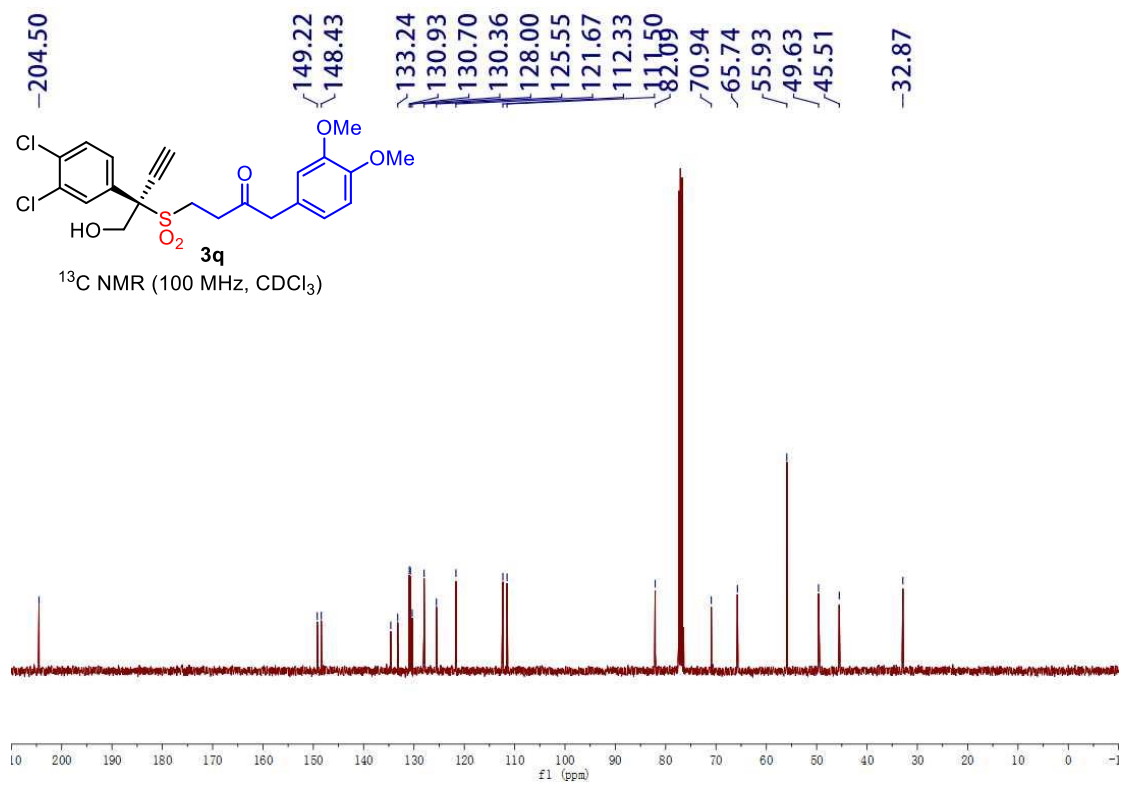

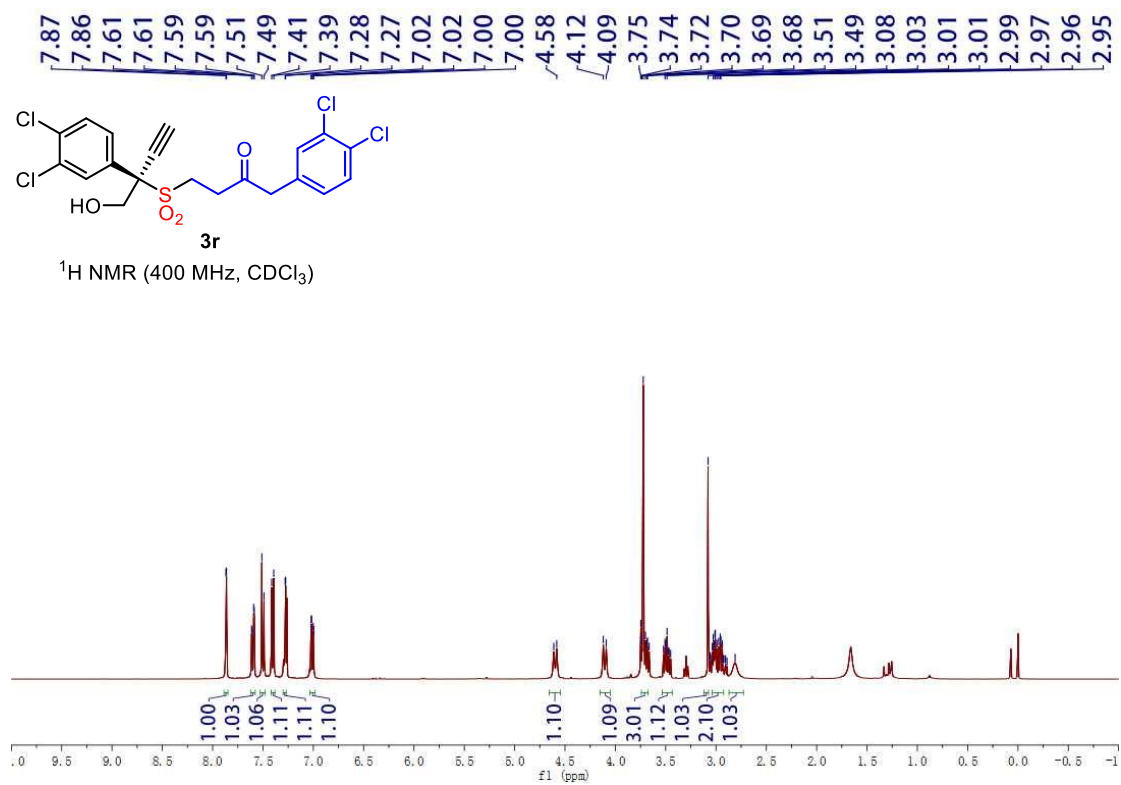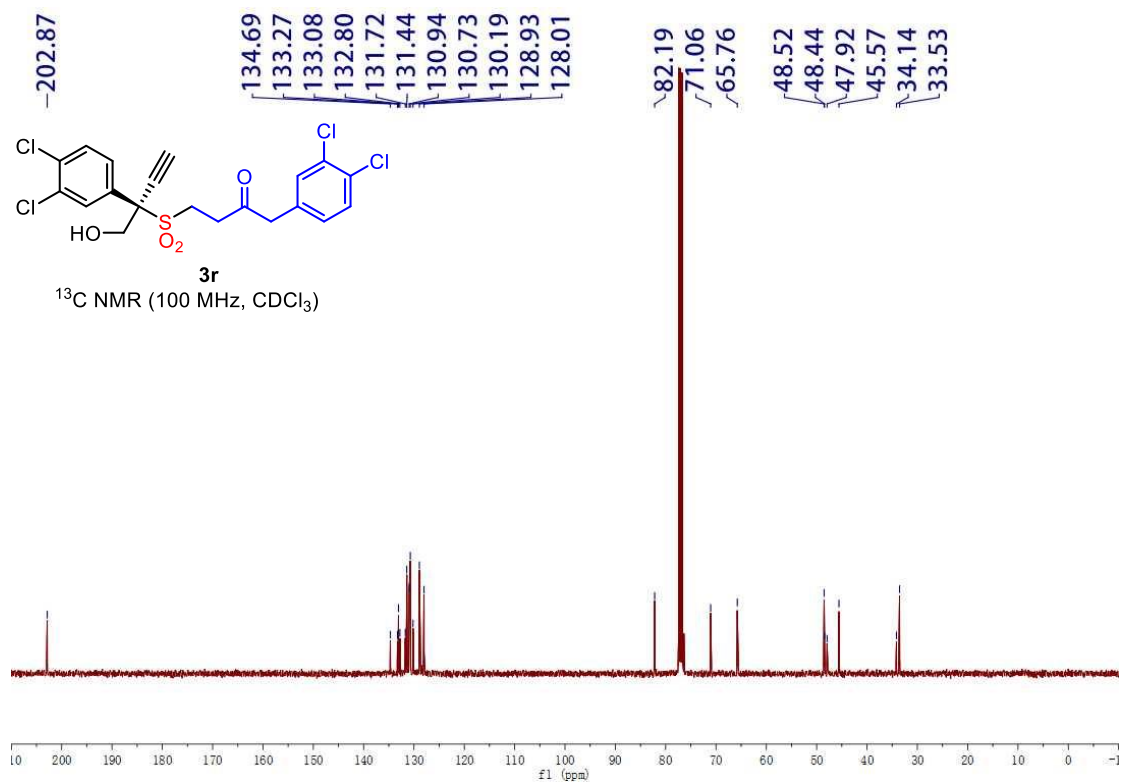

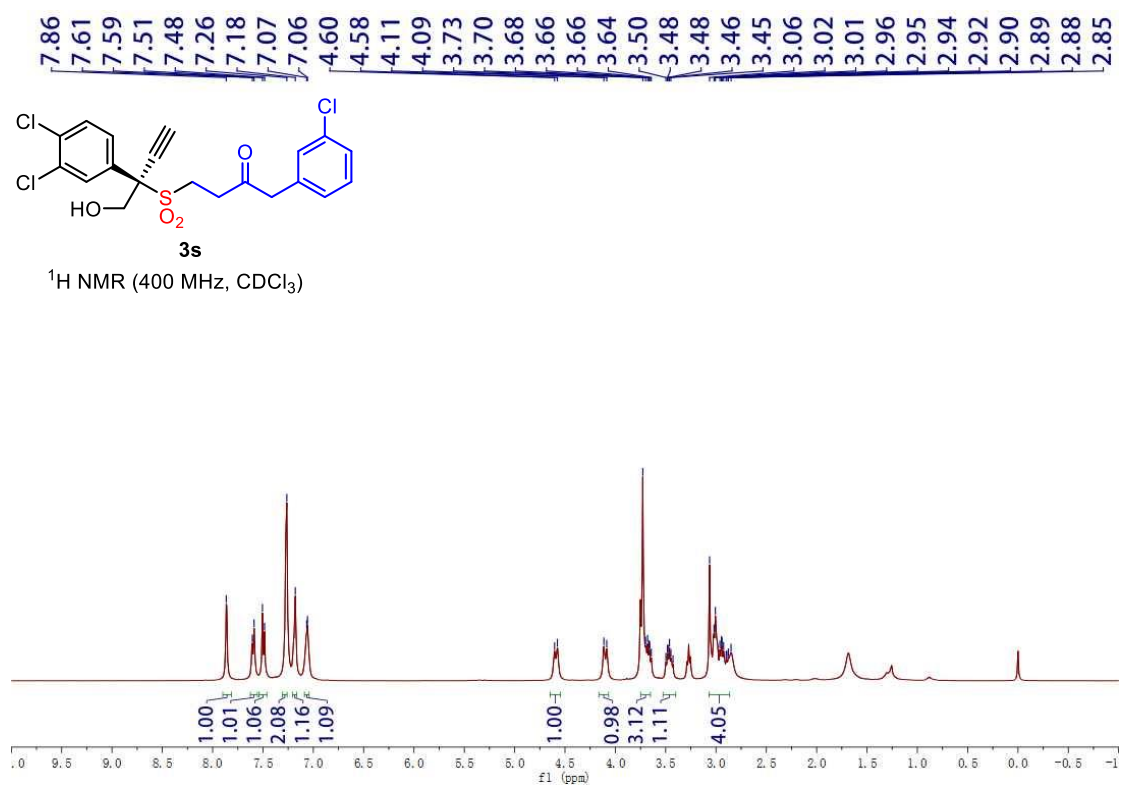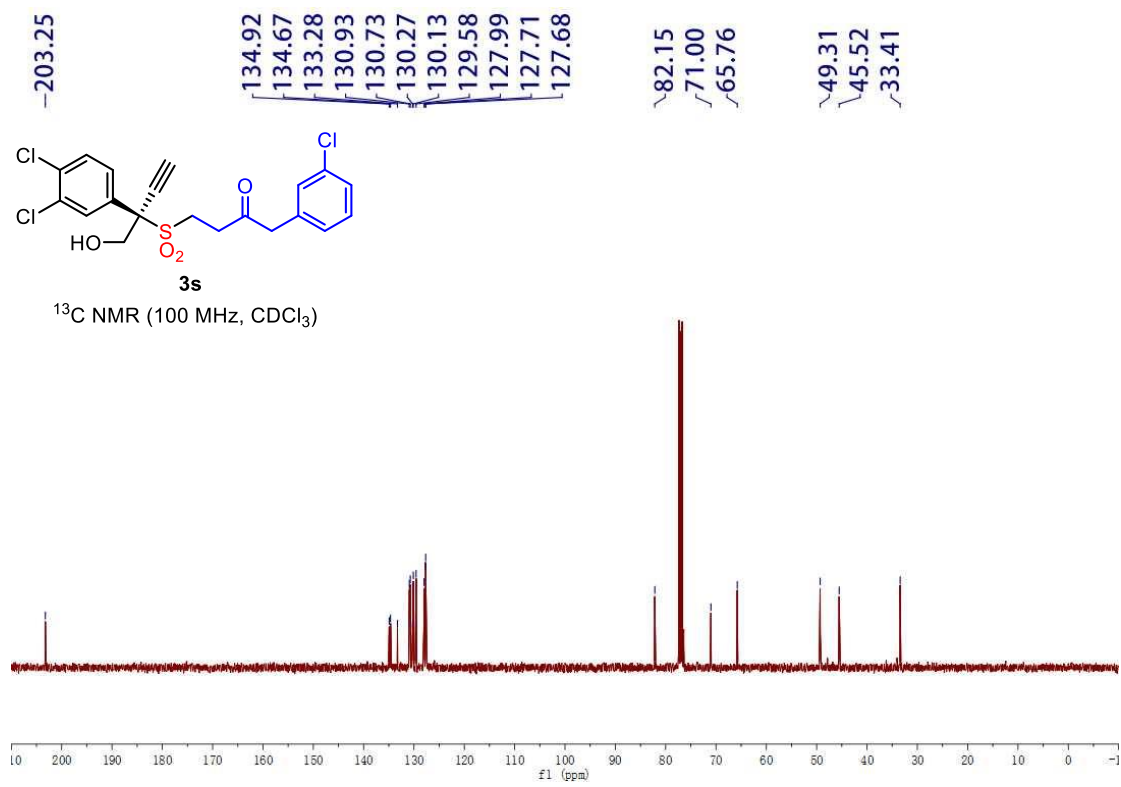

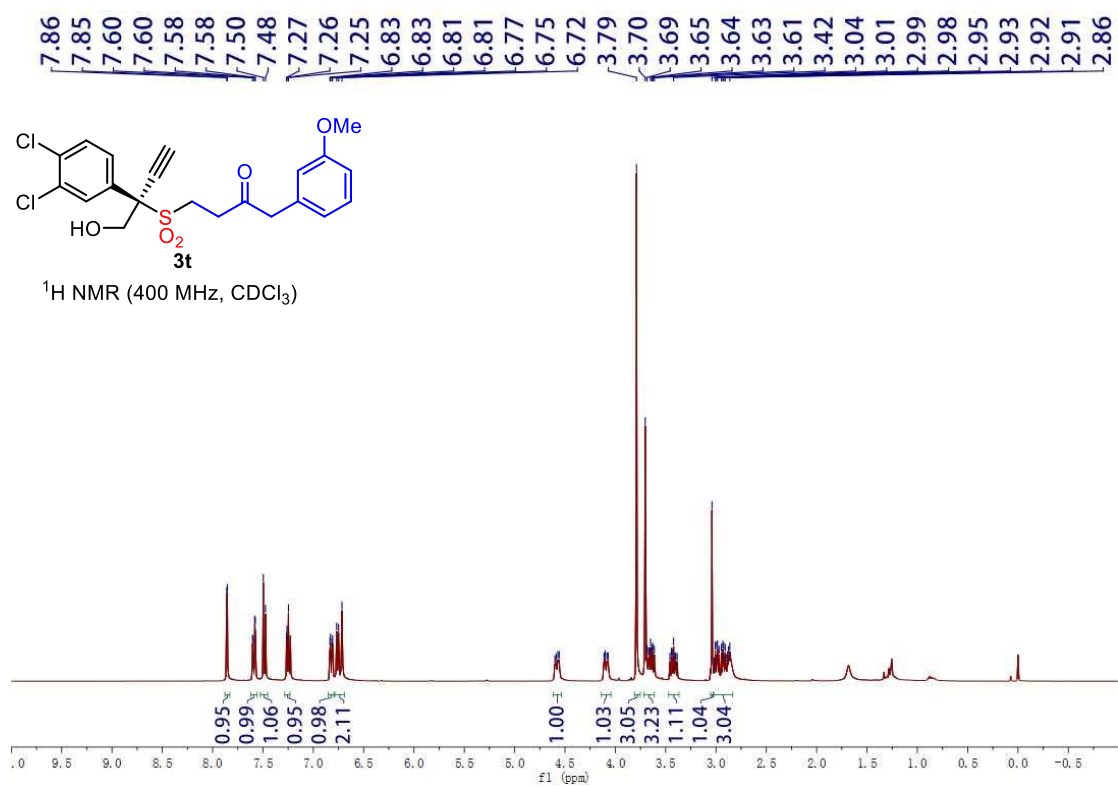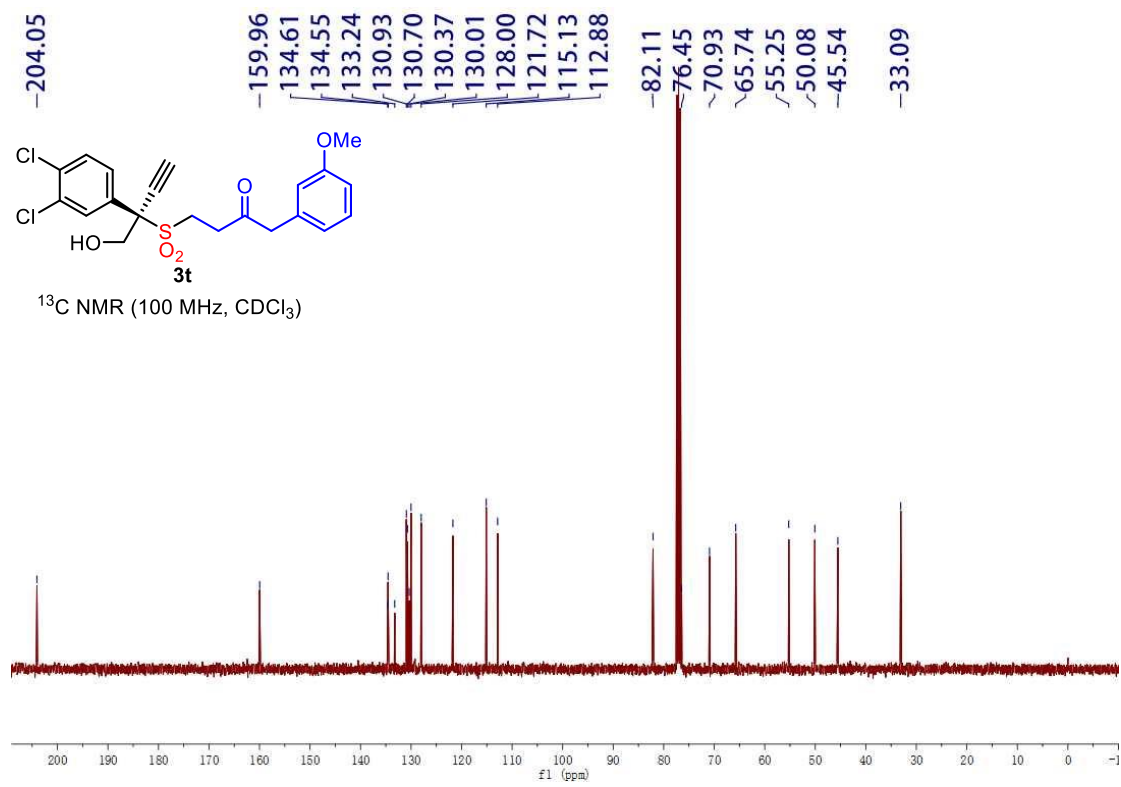

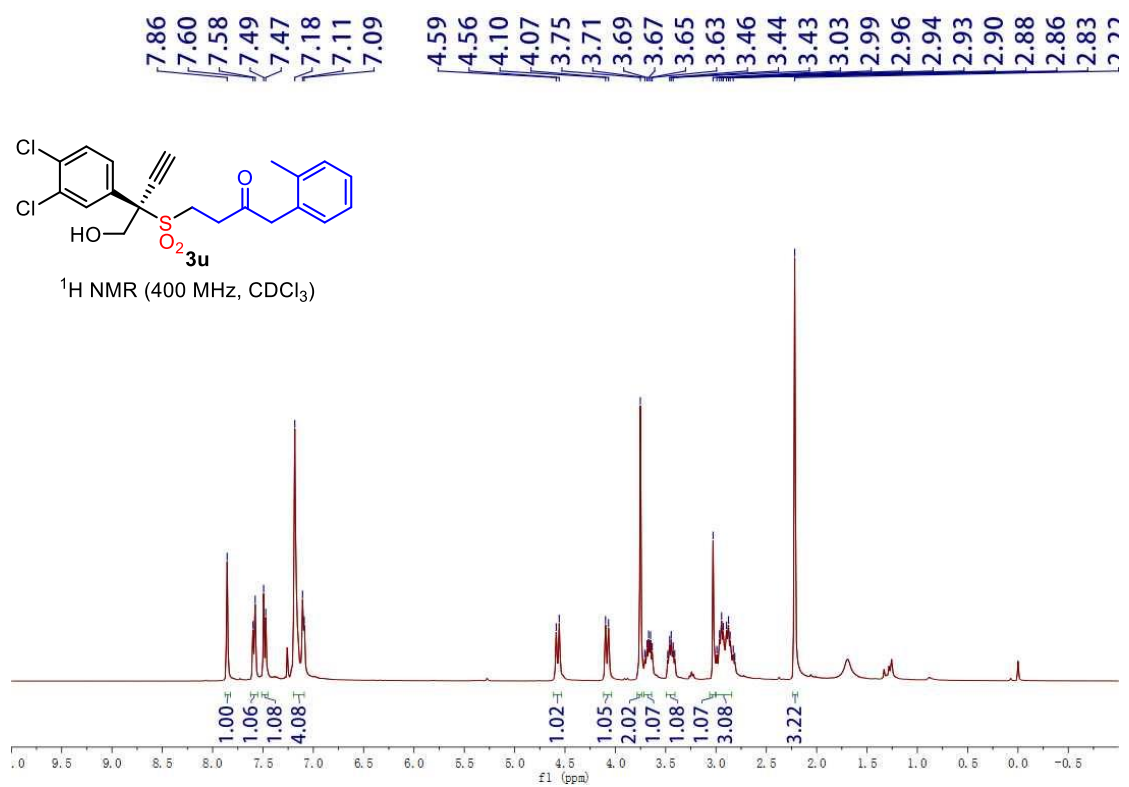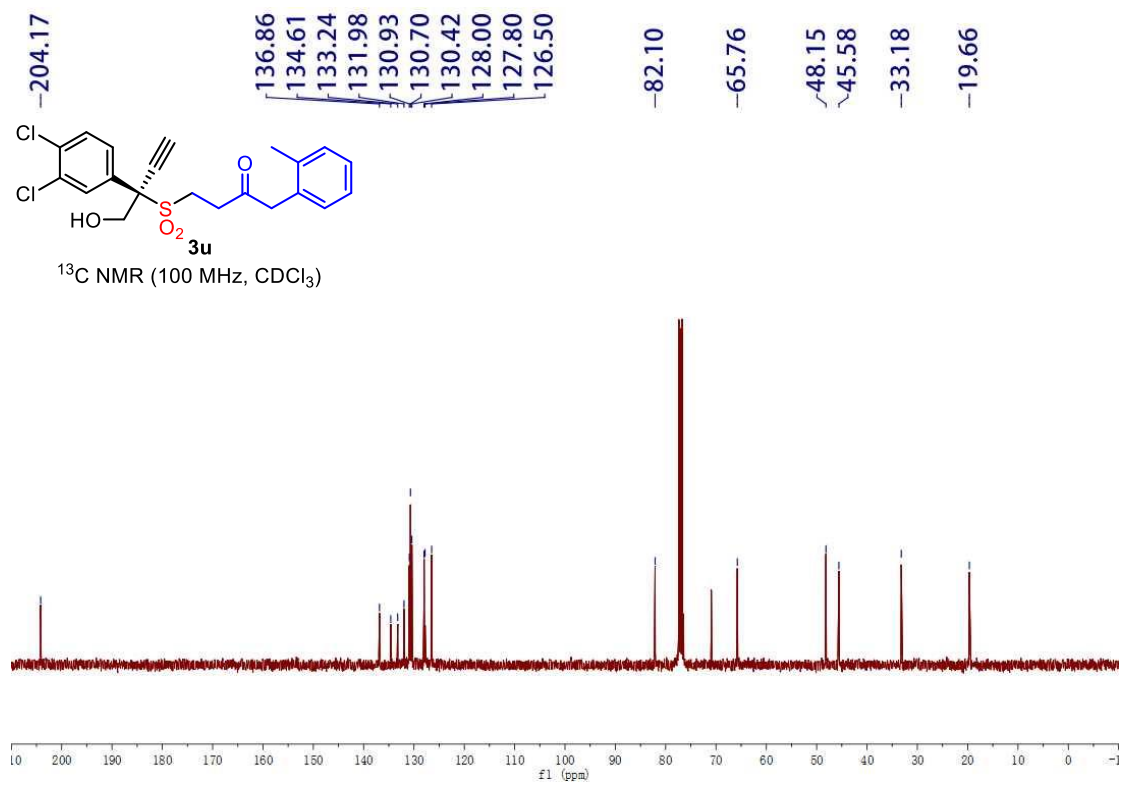

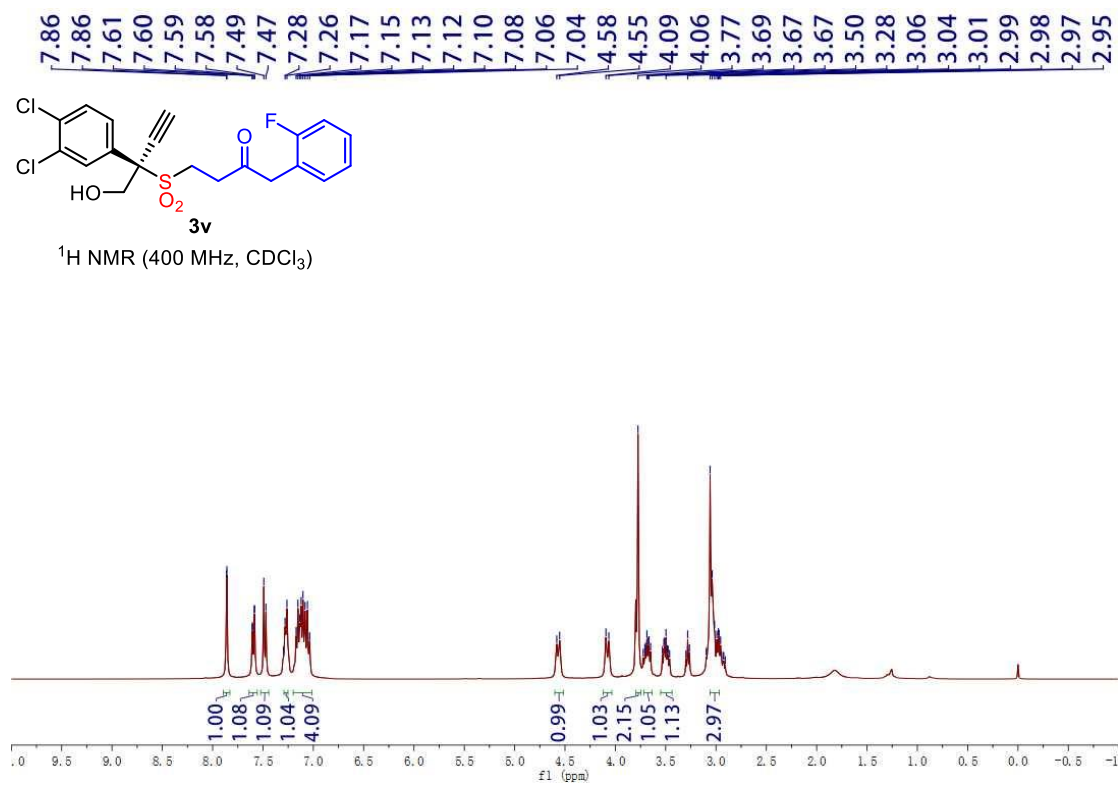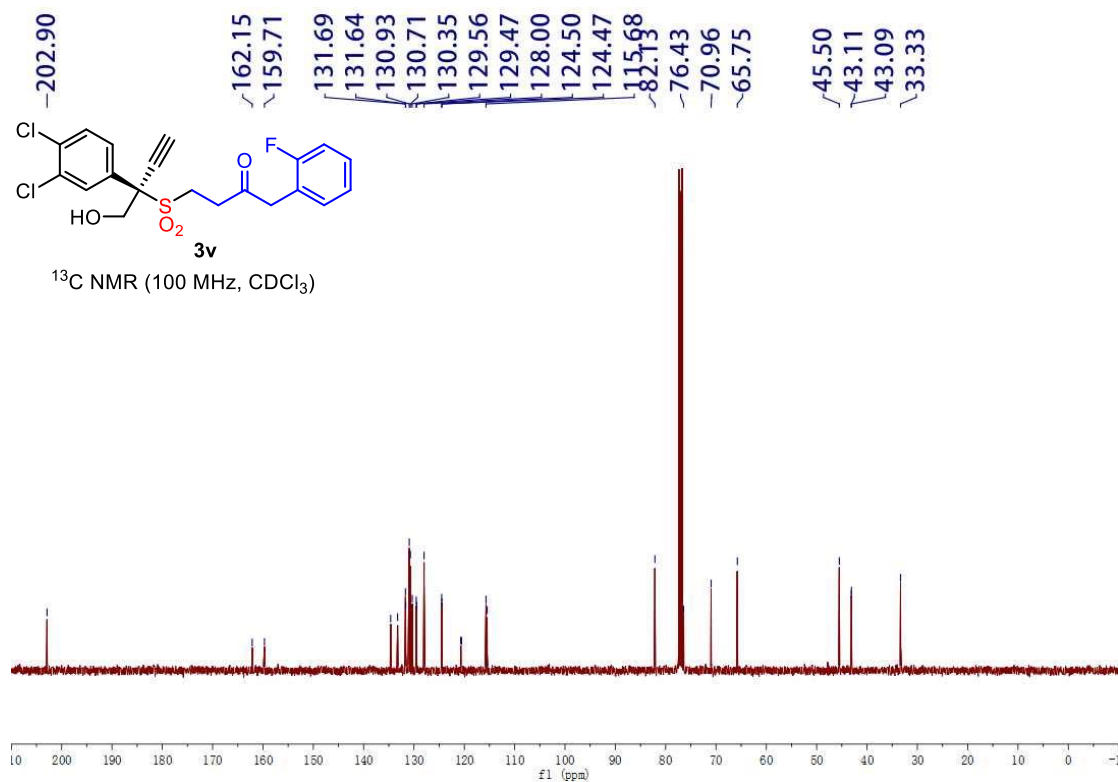

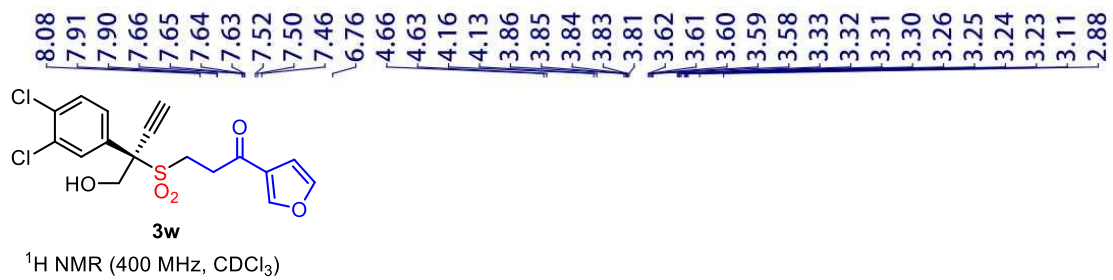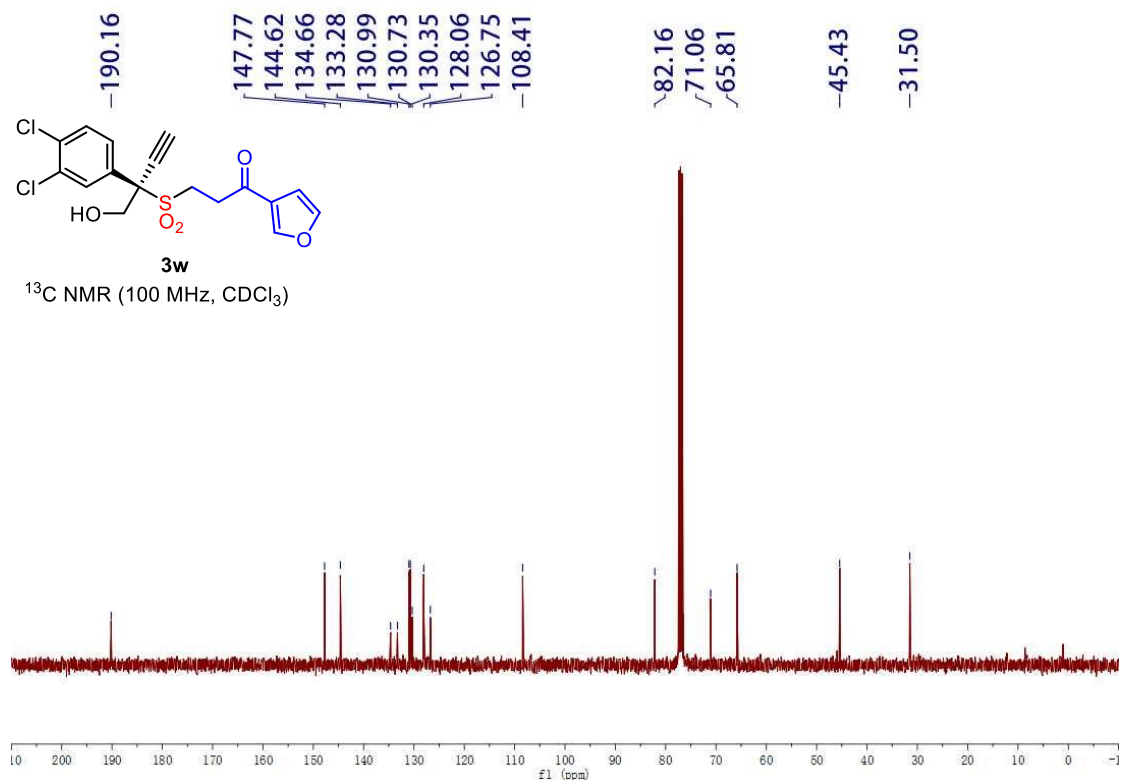

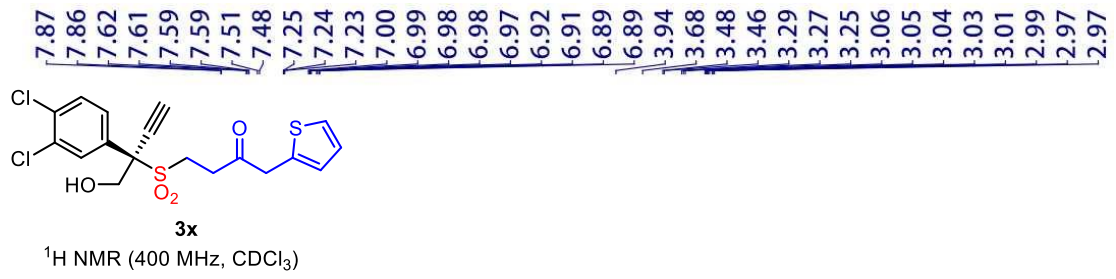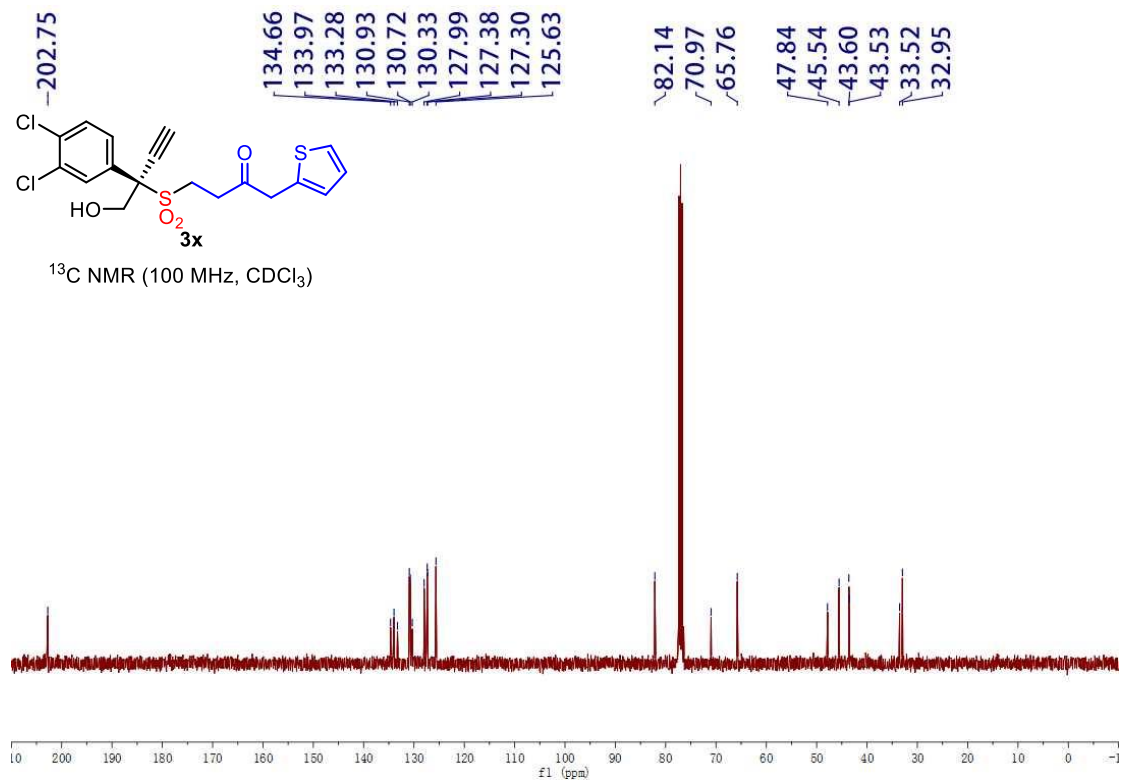



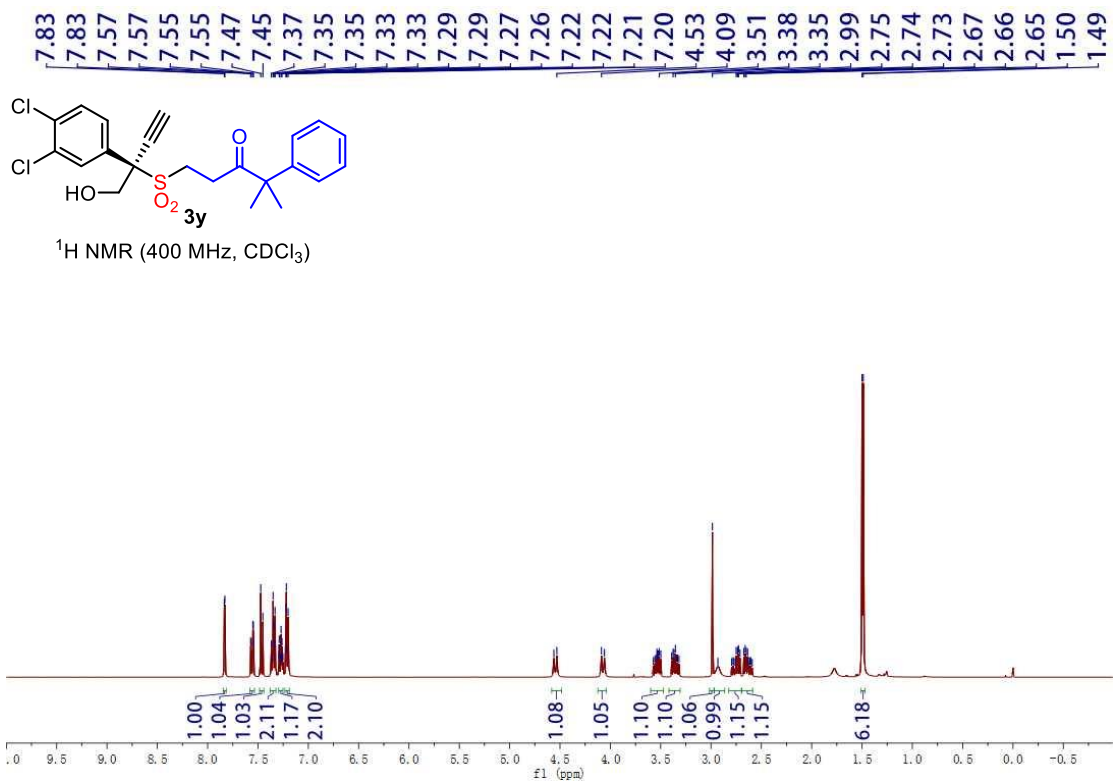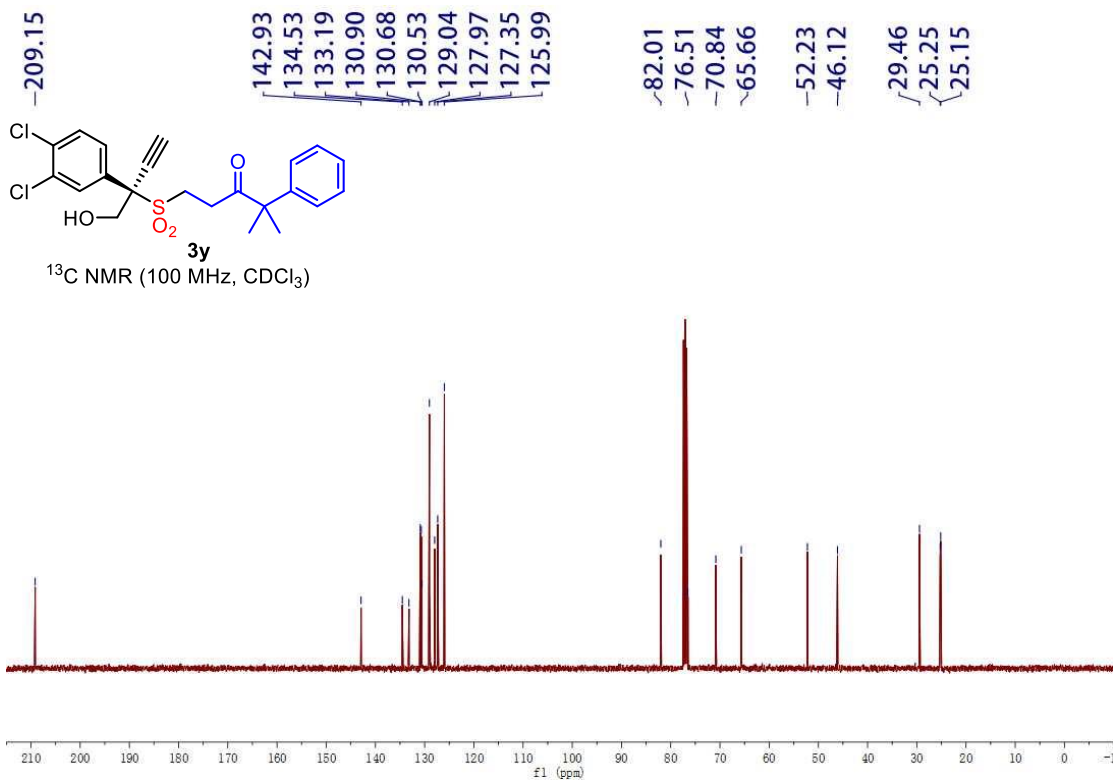

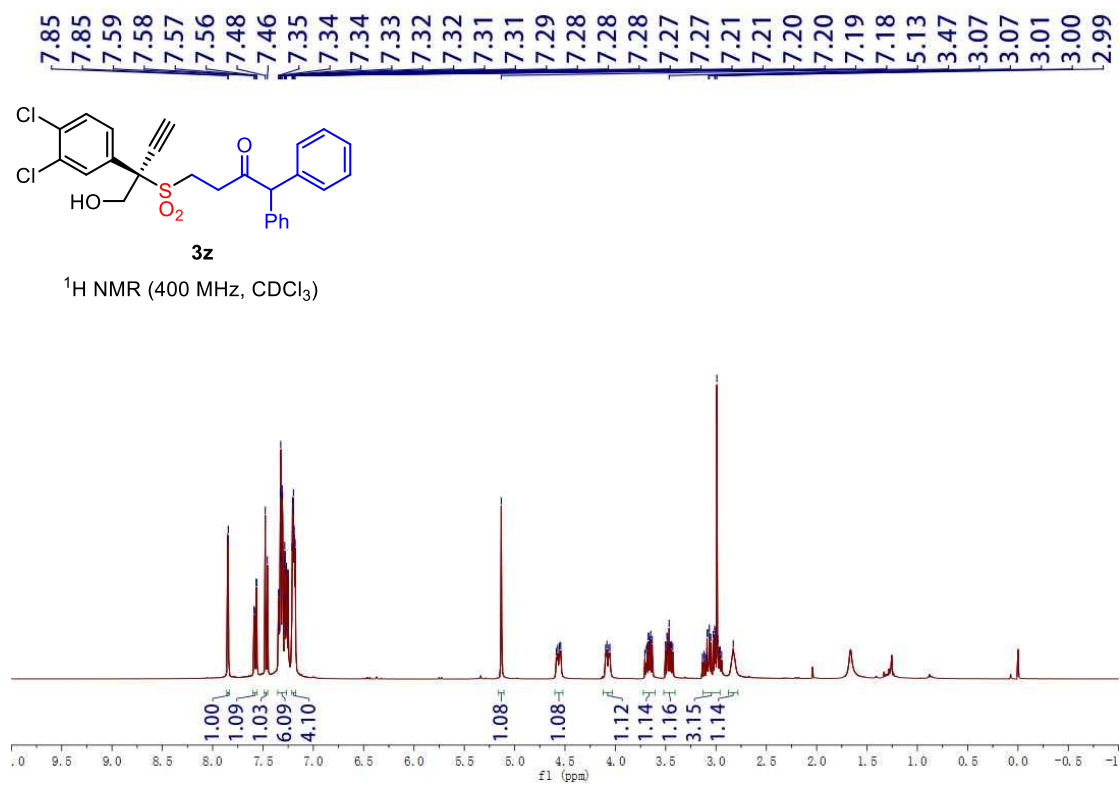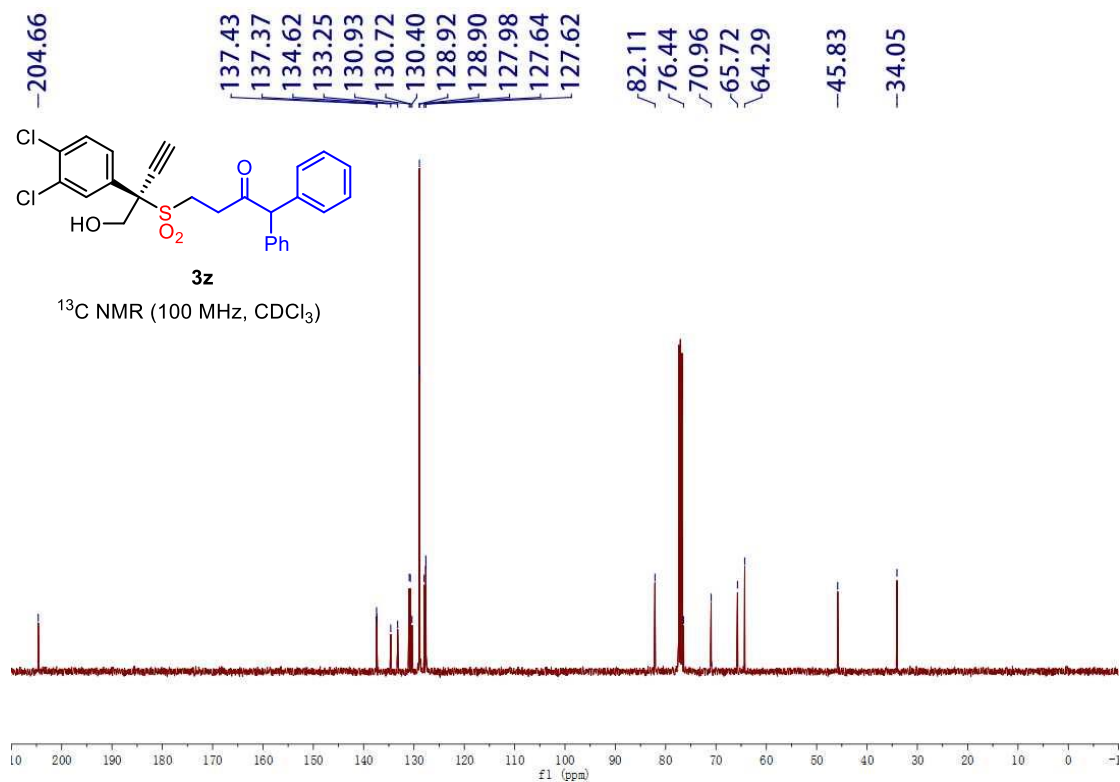

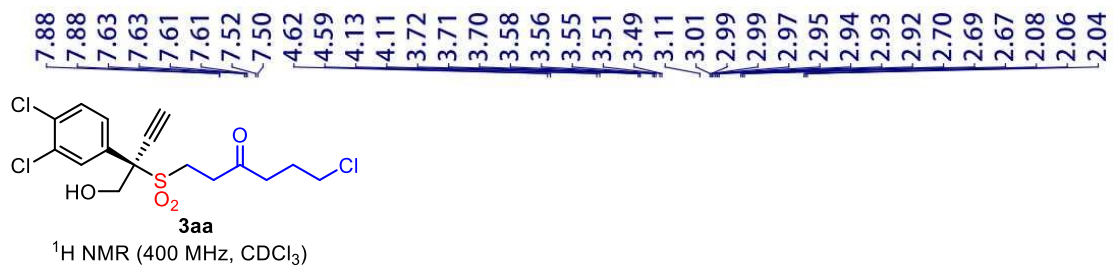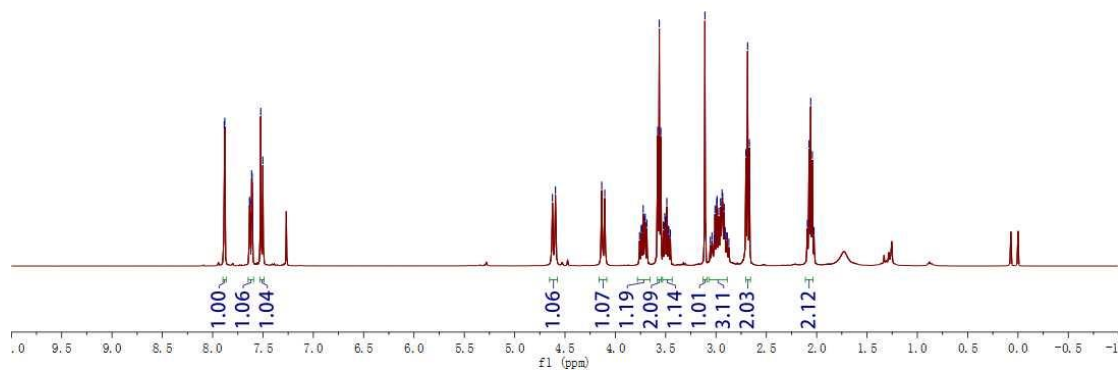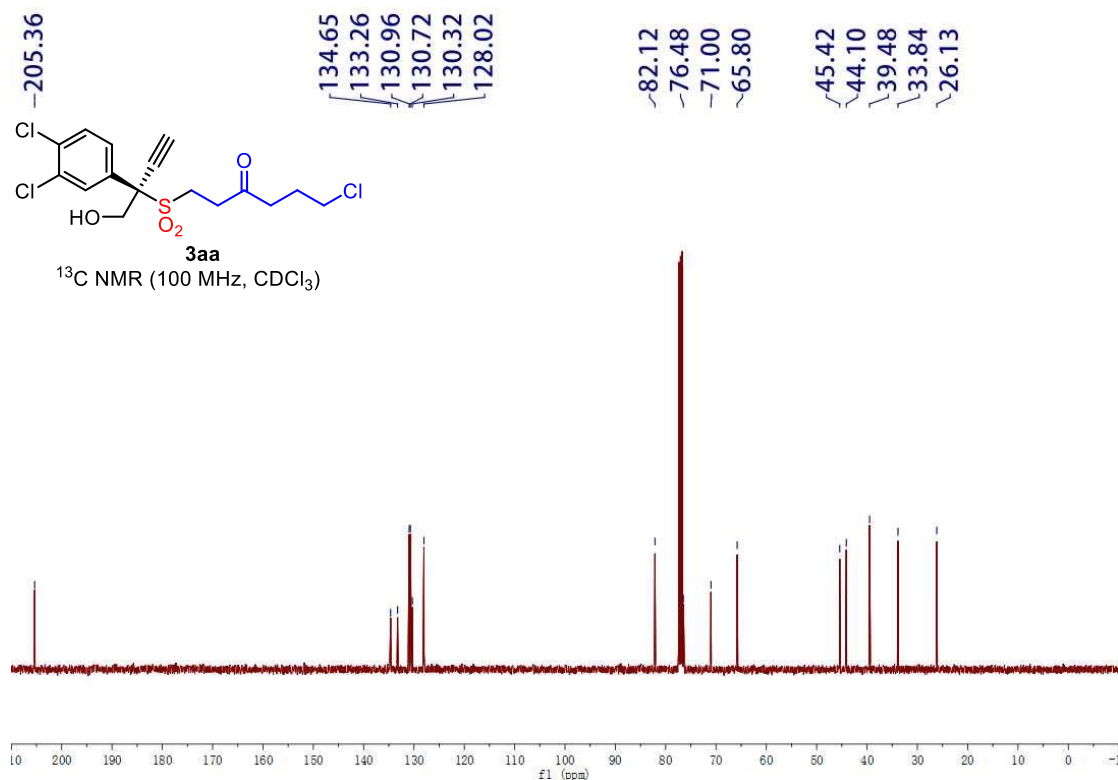

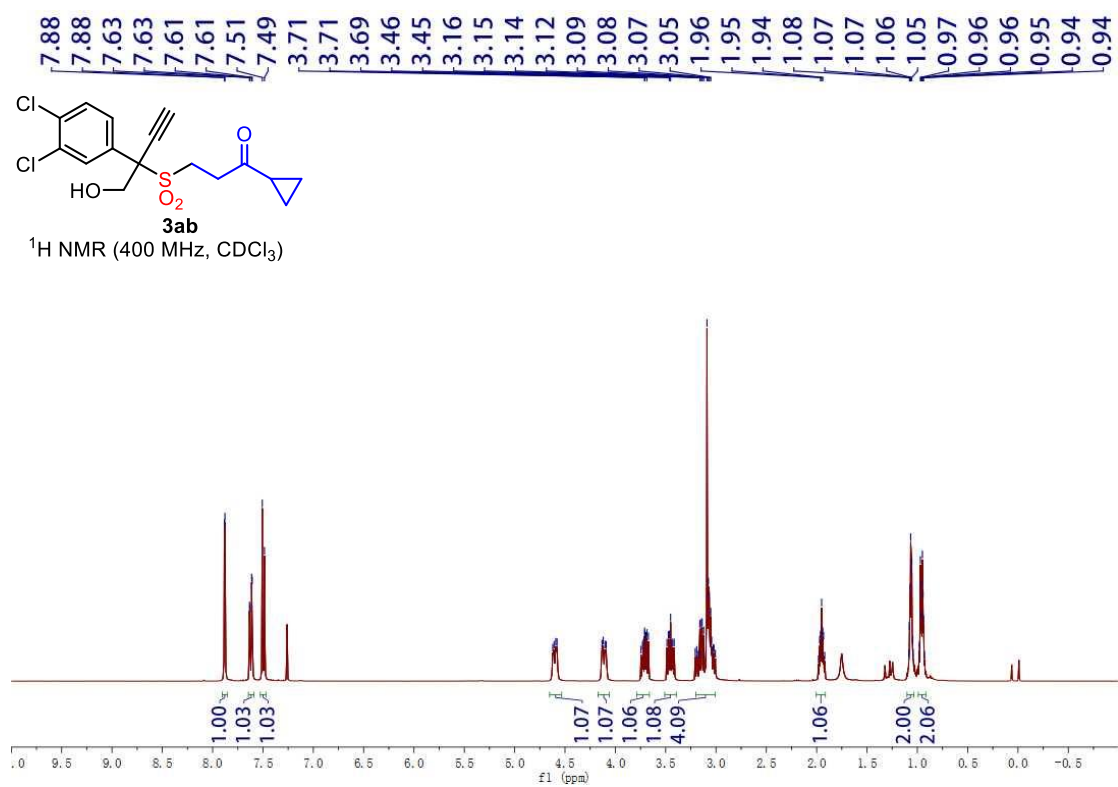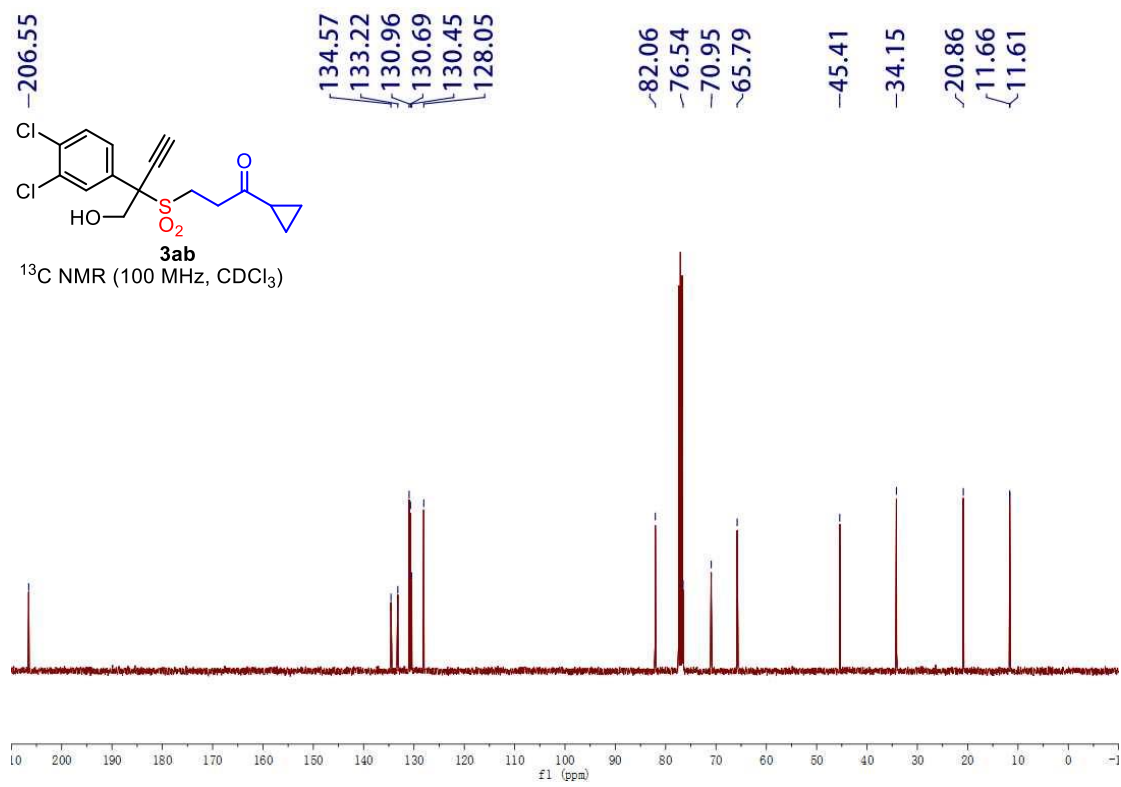

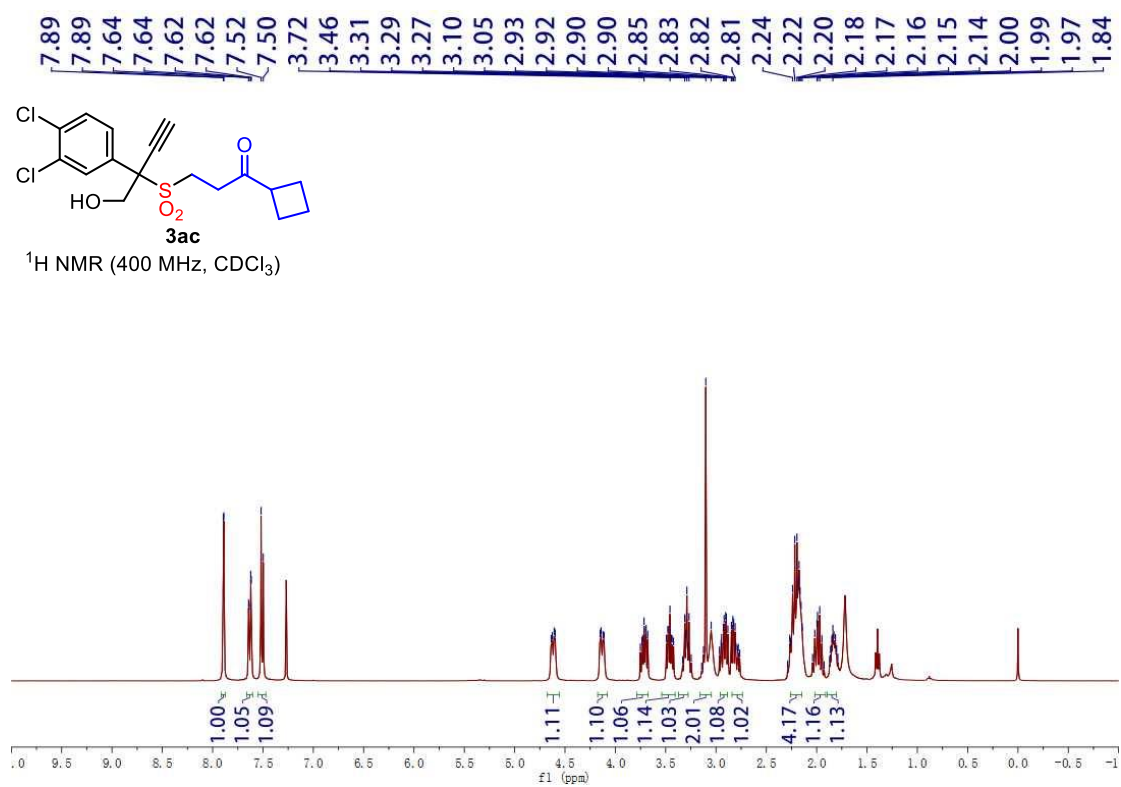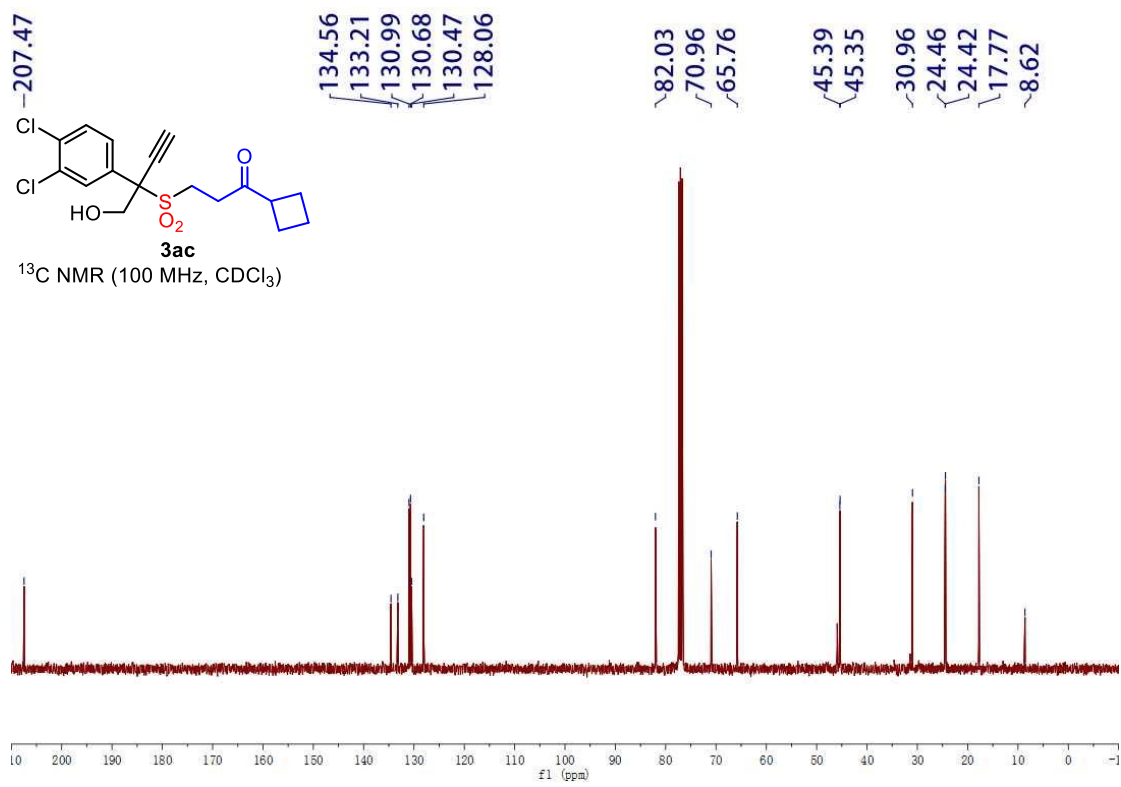

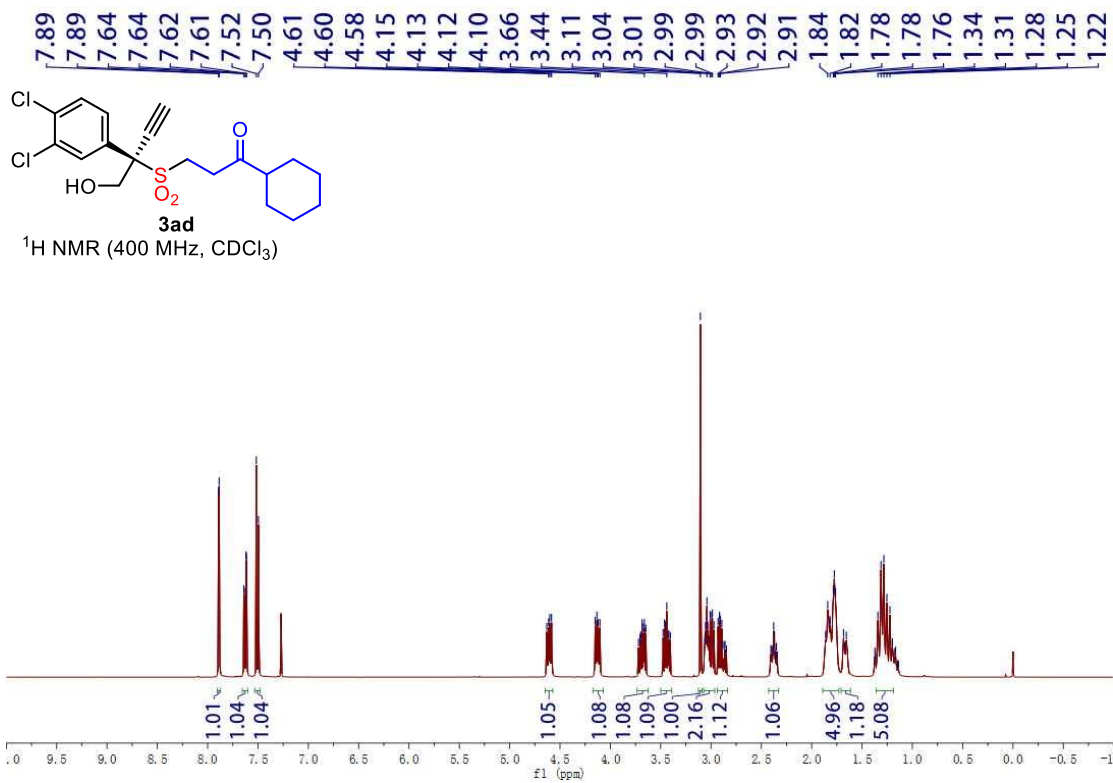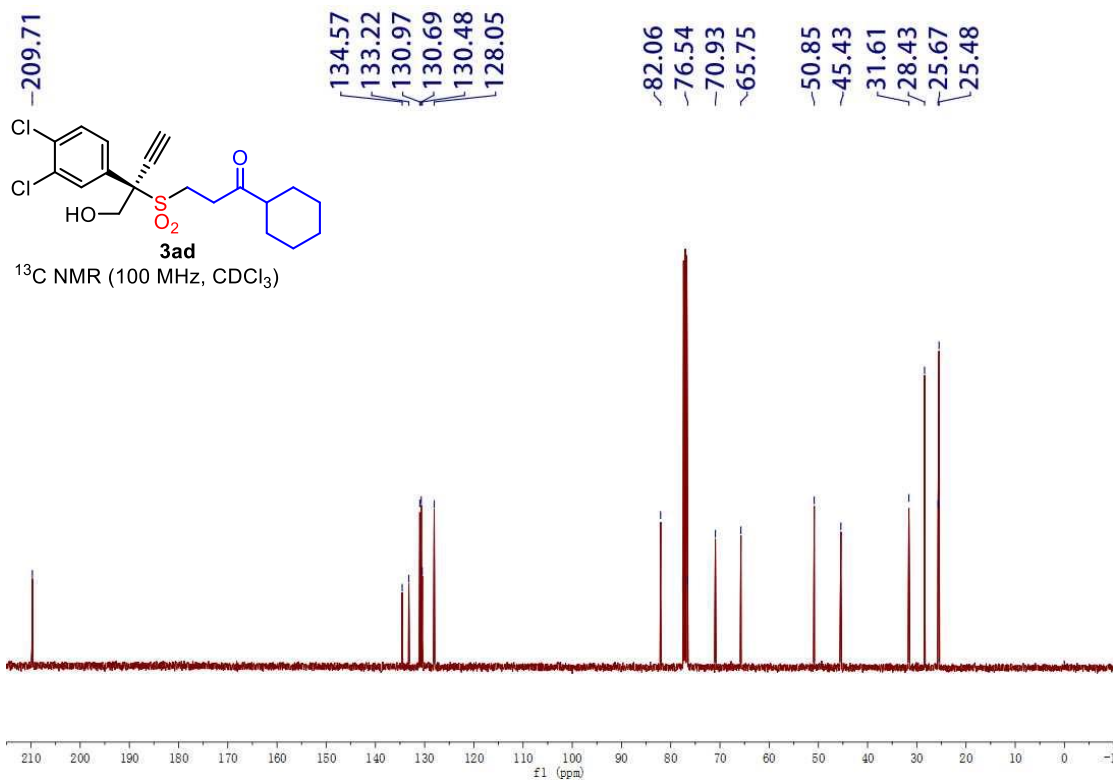

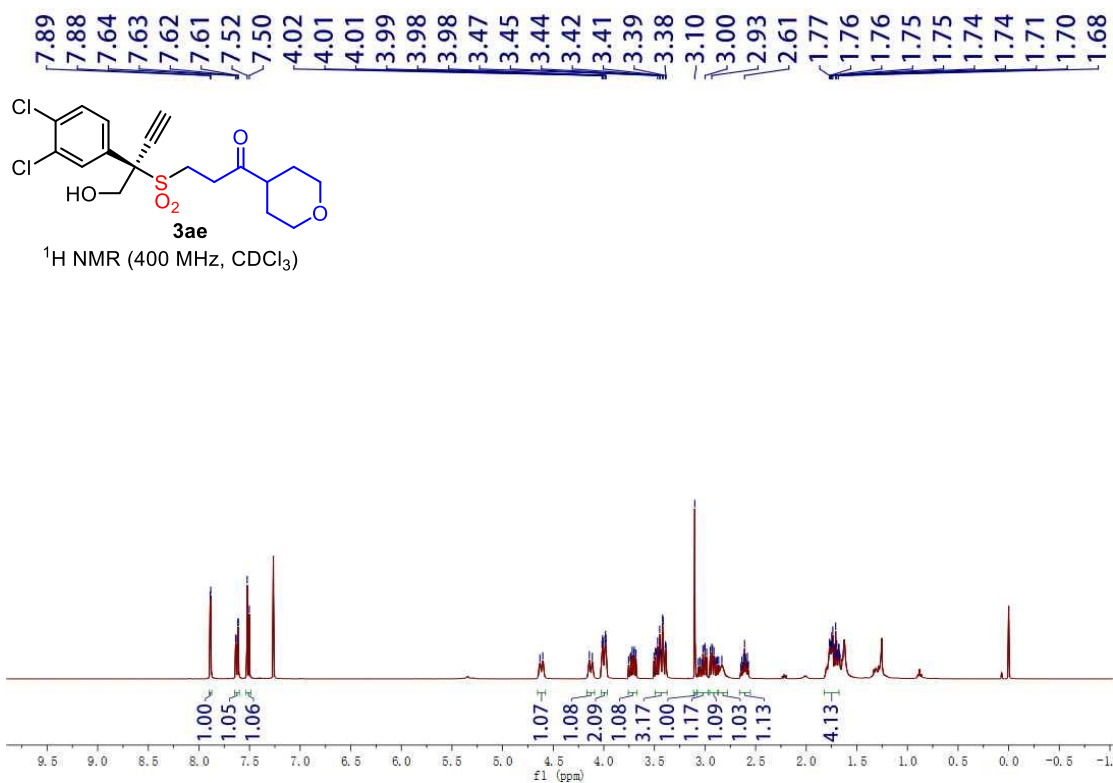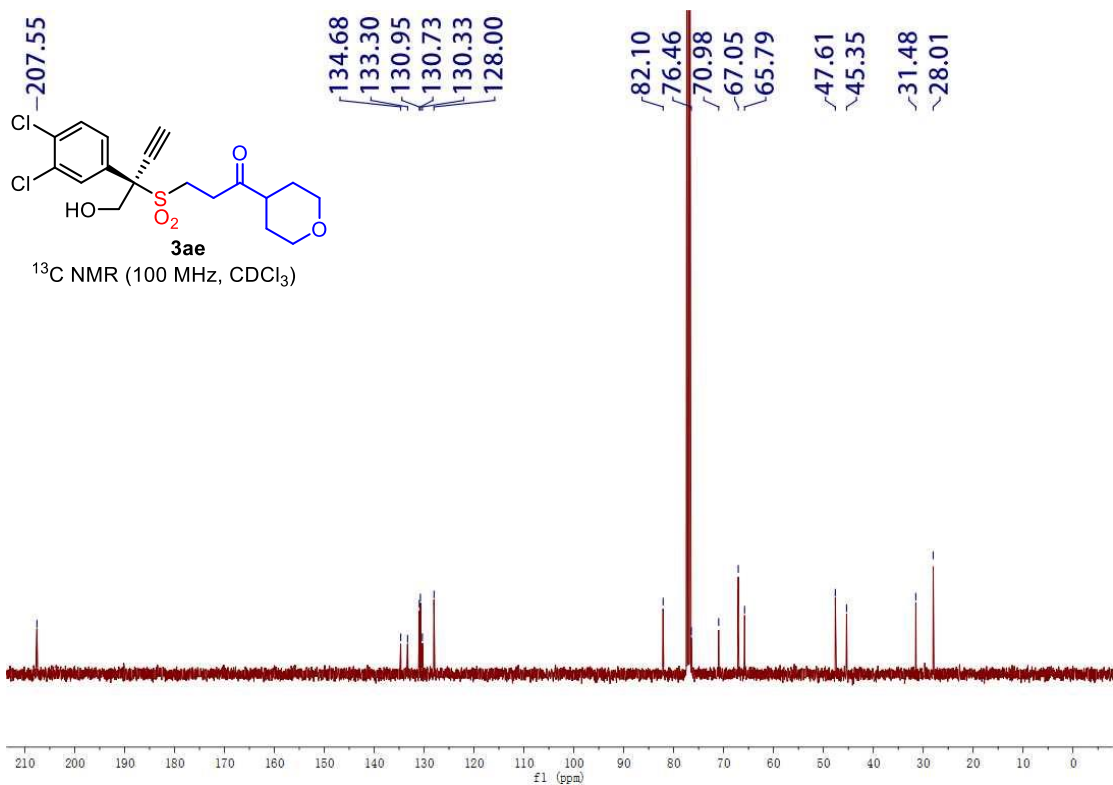

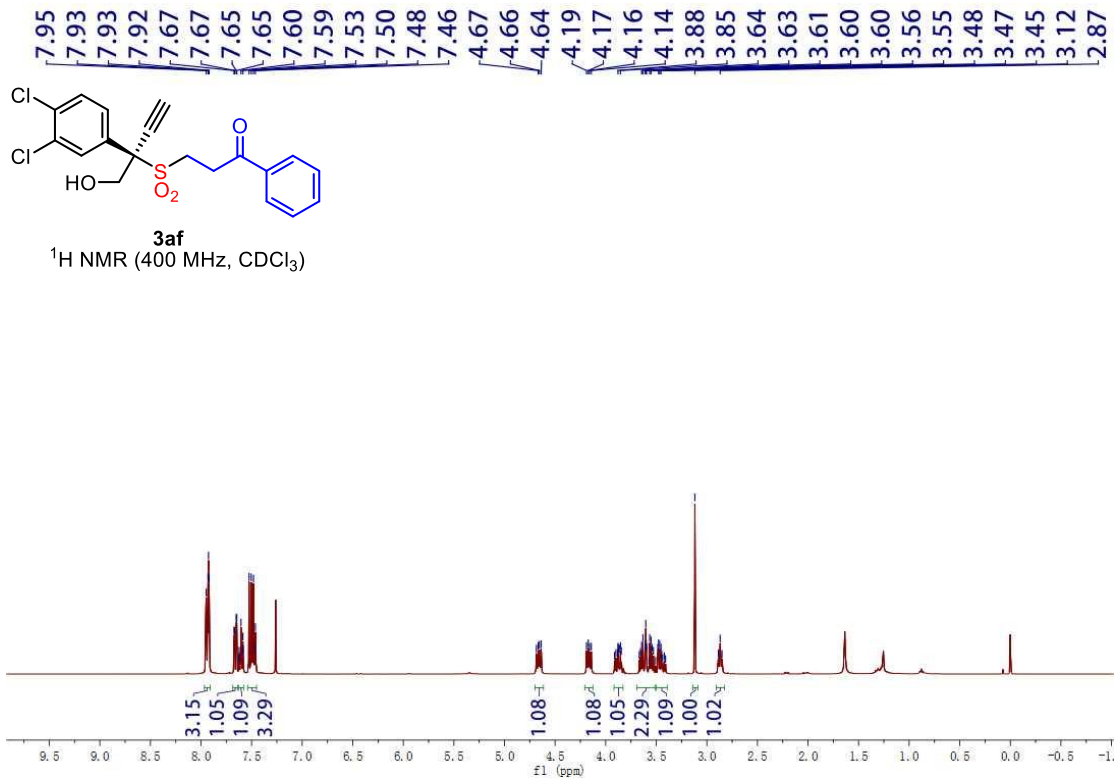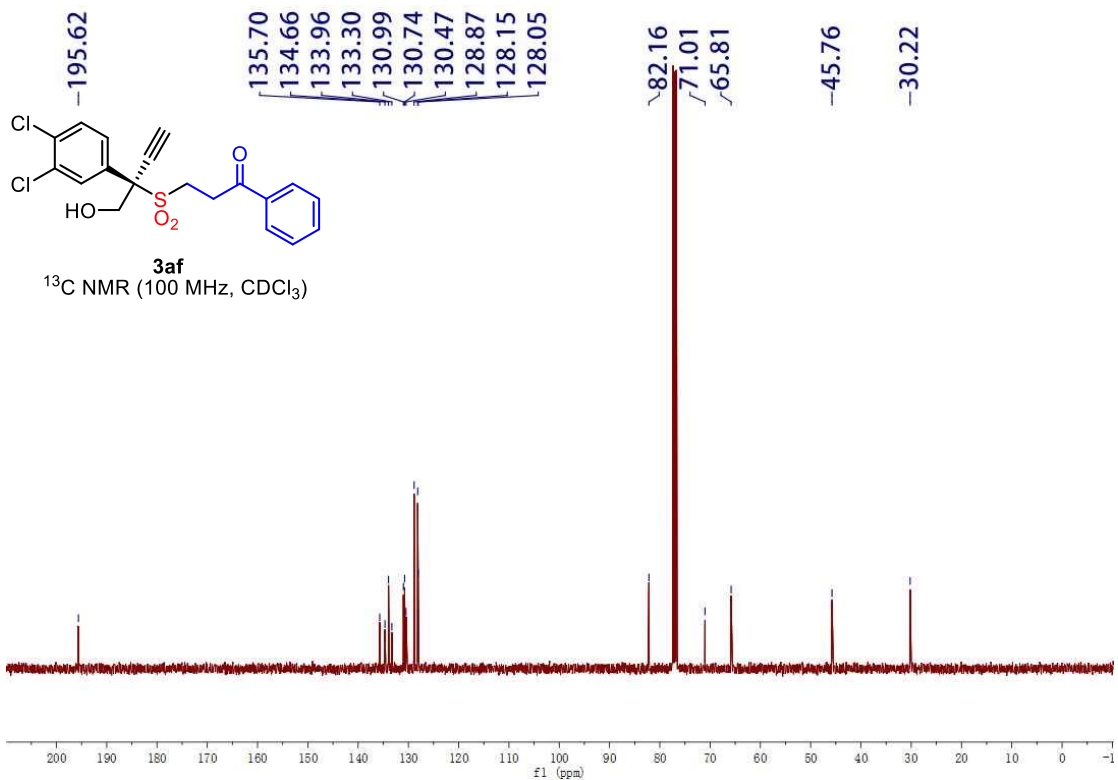



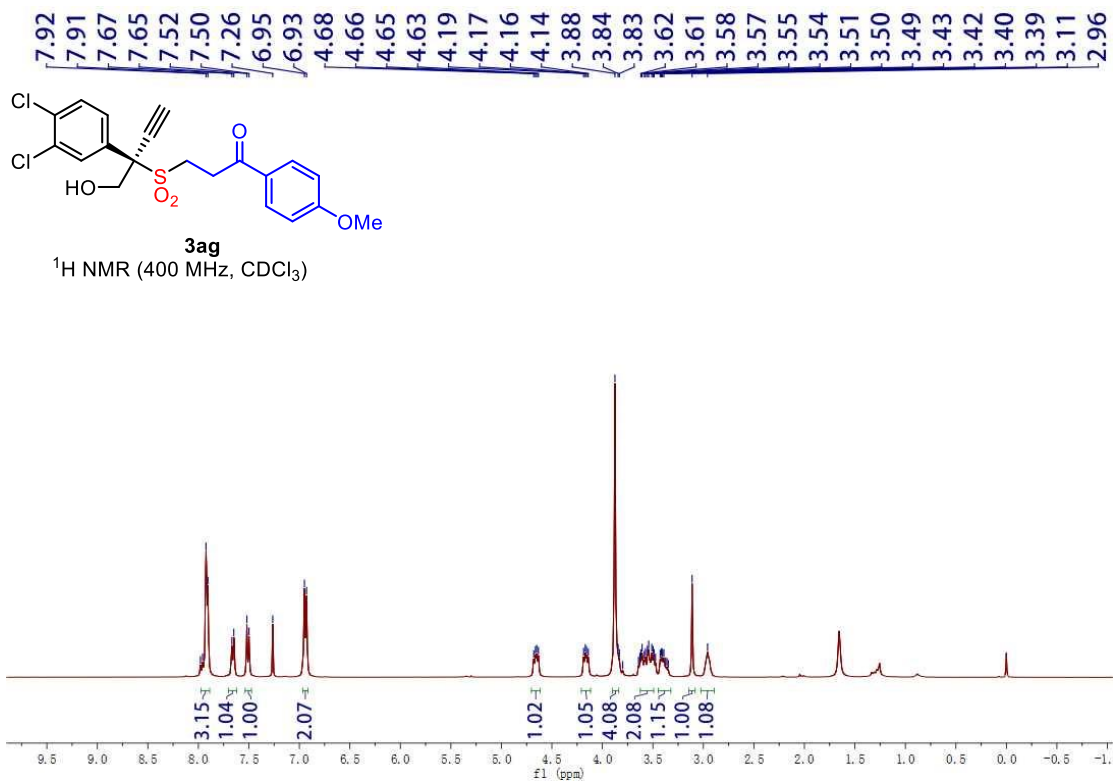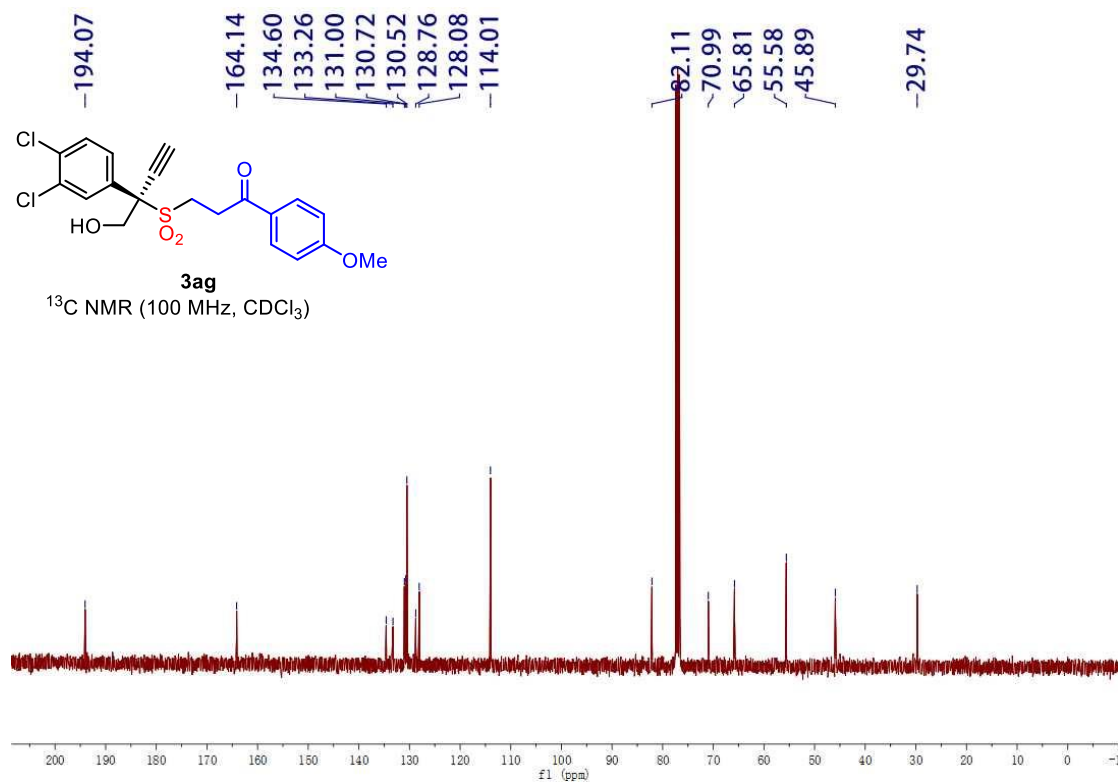

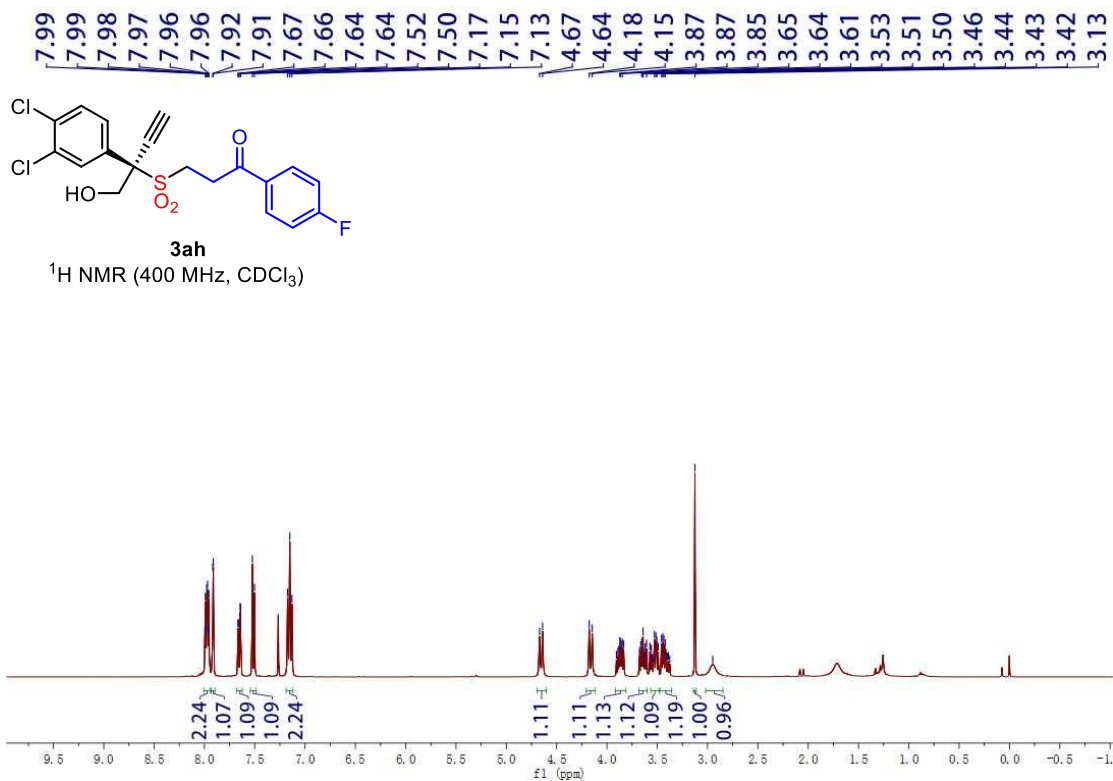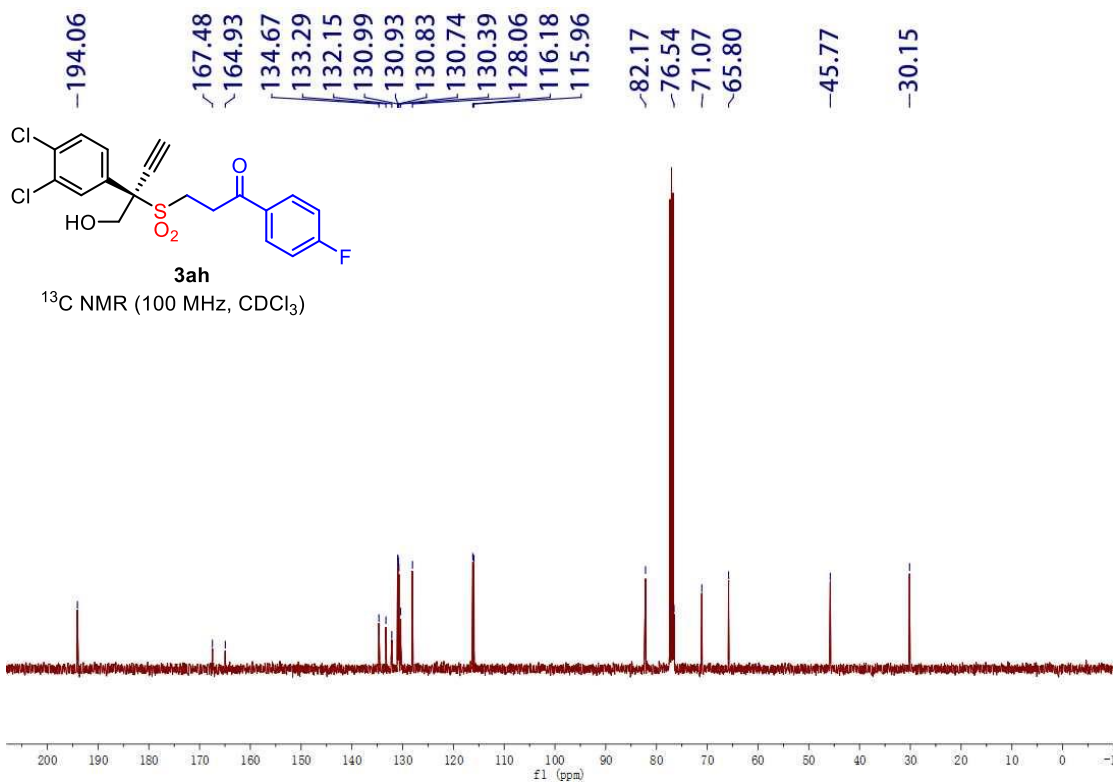

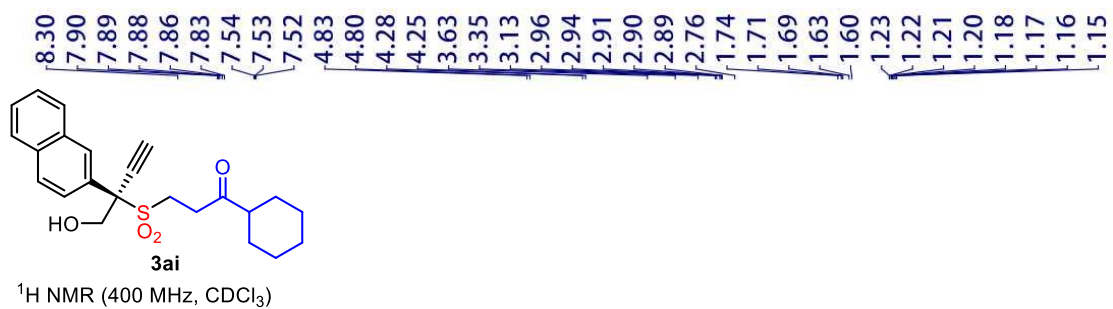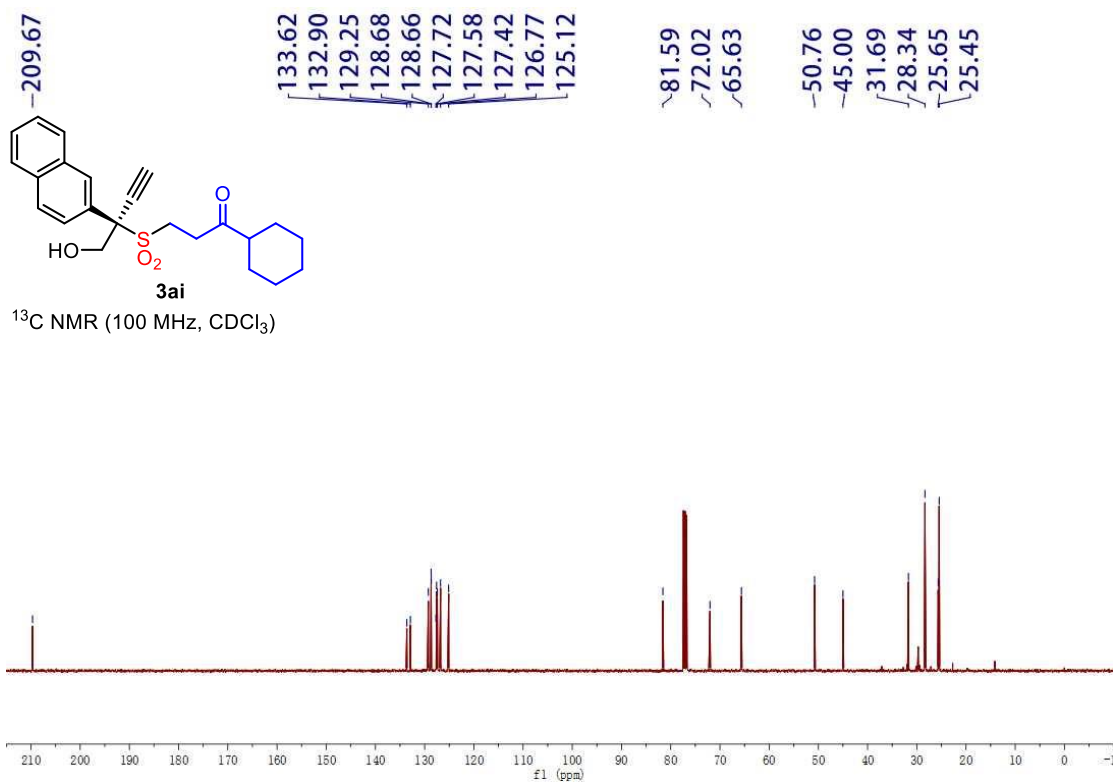

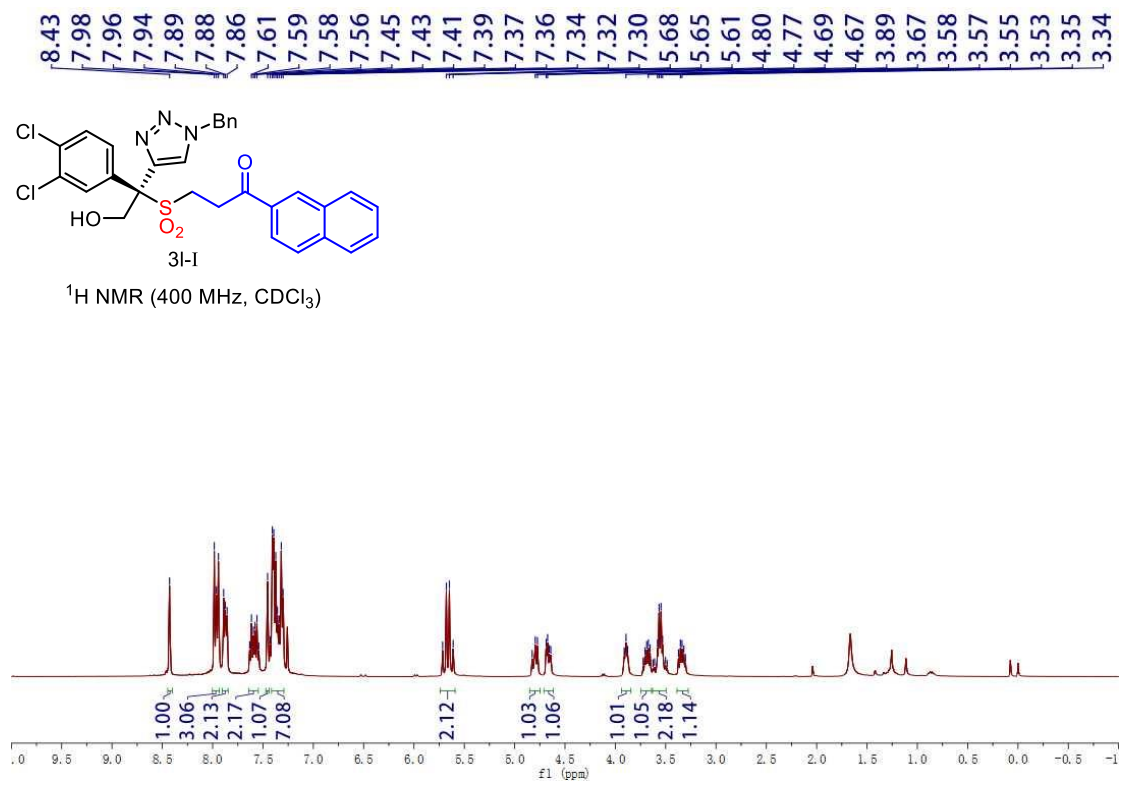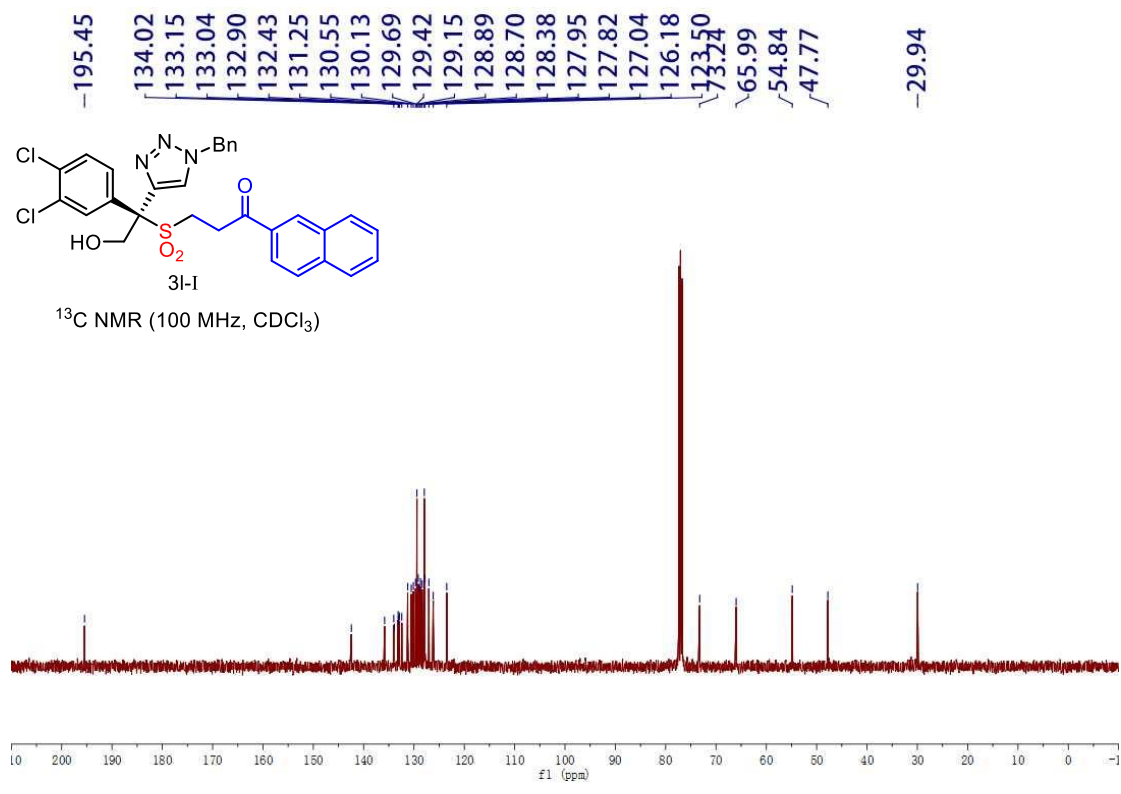

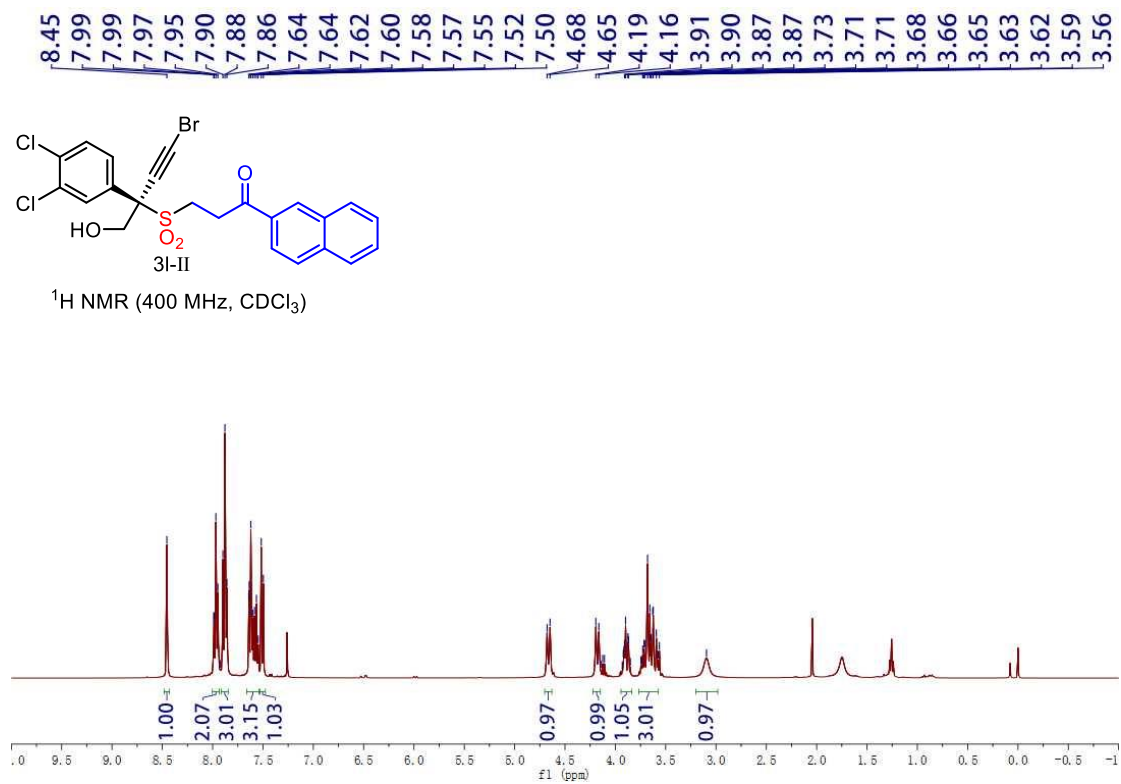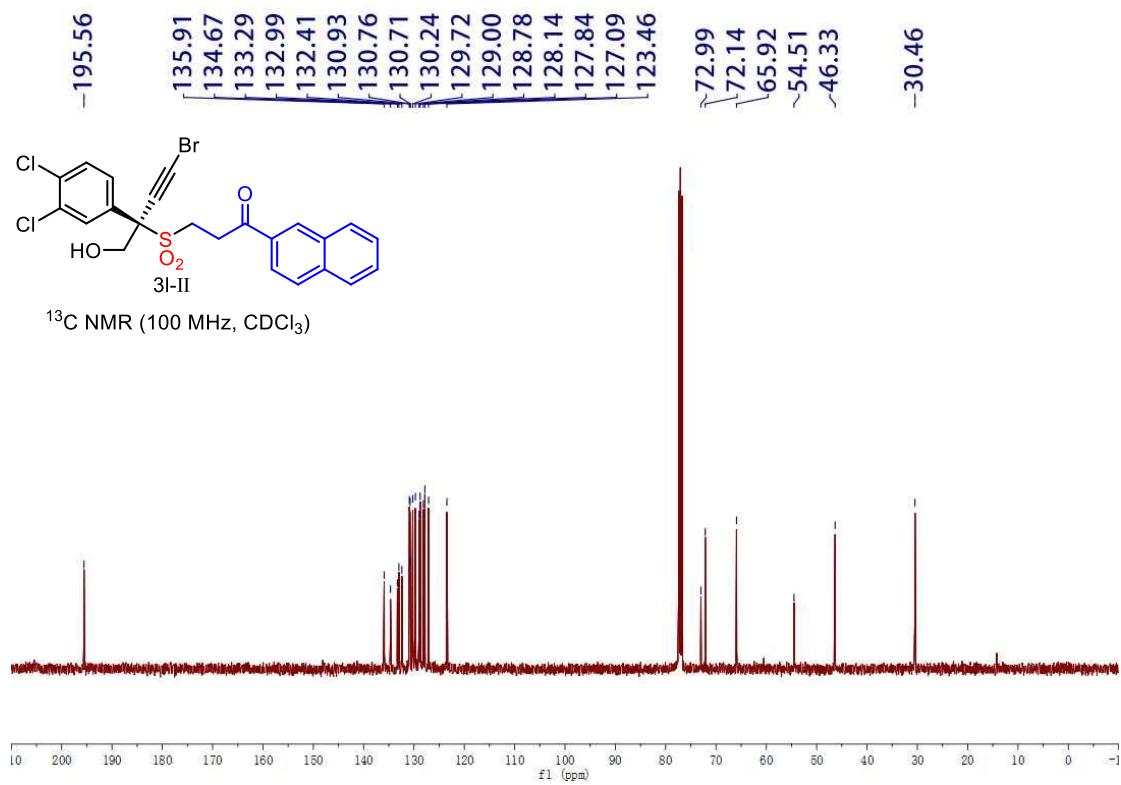

## 8. References

- (1) You, Y.; Li, T.-T.; Sun, T.-J.; Zhang, Y.-P.; Wang, Z.-H.; Zhao, J.-Q.; Yuan, W.-C. Enantioselective Construction of Vicinal Quaternary-Tetrasubstituted Carbon Stereocenters by Copper-Catalyzed Decarboxylative Propargylic Substitution. *Org. Lett.* **2022**, *24* (41), 7671–7676.
- (2) Zhang, C.; Ye, S.; Wu, J. Asymmetric Sulfonylation from a Reaction of Cyclopropan-1-ol, Sulfur Dioxide, and 1-(Alkynyl)naphthalen-2-ol. *Org. Lett.* **2024**, *26* (15), 3321–3325.
